# Supplementary material for: Rapid propagation of subduction initiation throughout the Iapetus Ocean
Source: Research Square preprint supplement (doi:10.21203/rs.3.rs-7803086/v1), 2025-10-23
Supplement: Supplementary file 1 [file 7f743f7fdc23f9f68b2e8171.xlsx]

## Sheet: Details_18Jul2023
Laboratory and sample preparation details
Laboratory name	Tectonics, Metamorphic Petrology & Orogeny (TeMPO) Laboratory, Johns Hopkins University
Sample type/mineral	Whole-rock glass
Sample preparation	Powdering of 40–100 g of fresh rock in tungsten carbide ring-and-puck-mill; flux melting of 0.4 g of resulting rock powder with 3.6 g of lithium tetraborate; glass disks broken and shards mounted in 1 inch epoxy round then ground to maximum exposure then polished to 0.3 µm SiC paste finish
Laser ablation system details
Make, Model and type	Teledyne (Photon Machines) Analyte G2
Ablation cell and volume	HelEx II active two-volume ablation cell
Laser wavelength (nm)	193 nm ArF Excimer
Pulse width	4 ns
Fluence	4.0 J cm-2
Repetition rate	10 Hz
Ablation duration	50 s
Analytical 'spot' shape and size	Square; 50 µm x 50 µm
Sampling mode / pattern	Constant speed line raster
Raster velocity	10 µm s-1
Cell carrier gas flows	0.3 L min-1 He flow into ablation cup; 0.5 L min-1 He flow into ablation cell
Inductively-coupled-plasma mass spectromer (ICP-MS) system details
Make, model, type, analytical mode	Agilent Technologies 8900 triple quadrupole ICP-MS, operating in single quad mode
Sample introduction	1 cm inner diameter PFA tubing with inline Teledyne 'SQUID' smoothing device, 2.5 mm quartz injector; 5 cm sampling depth; Ni cones, high-sensitivity skimmer insert
RF power	1550 W
Make-up gas flow and position	0.90 L min-1 Ar, between cell and torch
Detection system	Single ion-counting SEM
Masses measured (and dwell times)	29 (10 ms); 31,43,51,52,55,59,60,88 (50 ms); 45,47,63,66,71,72,85,89,90,93,95,118,133,137,139,140, 141,146,147,153,157,159,163,165,166,169,172,175,178,181,208,232,238 (100 ms)
Total integration time	3.761 s
‘Sensitivity’ as useful yield	0.003%–0.005% U [100 x (#ions detected / #atoms sampled); Schaltegger et al. (2015)]
IC Dead time	41.6 ns
Data processing details
Gas blank	15 s on-peak zero subtracted
Calibration and standardsl strategy	NIST612 as primary reference material for geochemistry, AGV-2G, BCR-2G and BHVO-2G to assess accuracy
Common-Pb correction	No common-Pb correction applied
Data processing packages	Iolite v4.6.1 (Paton et al., 2011), using the Trace Elements Next data reduction scheme and a mean–median fit to the standard data
Uncertainty level and propagation	Elemental abundances in "Data_" sheets are ppm with 2σ internal uncertainty calculated from counting statistics of the ICP-MS. Uncertainty for each element–non-primary reference material combination calculated from % difference between measured and accepted value (accuracy) added in quadrature to the 2σ internal uncertainty. Session uncertainty calculated by 2sd value of above-calculated uncertai…
Discordance criteria	Discordance reported as the relative difference between the measured 207Pb/235U and 206Pb/238U dates; calculated as |1–(206Pb/238U date)/(207Pb/235U date)| and reported as %
Interpreted age transition	The transition from preferred interpretation of 207Pb/206Pb (for older) to 206Pb/238U (for younger) dates set at 850 Ma
Quality control and validation (materials)	AGV-2G (Jochum et al., 2005)
	BCR-2G (Jochum et al., 2005)
	BHVO-2G (Jochum et al., 2005)
Quality control and validation (results)	AGV-2G: 12.3% (excluding Si, P, Ti, Mn, Cu, Ga, Ge, Mo, Sn)
	BCR-2G: 8.6% (excluding Si, P, Ti, Mn, Cu, Ga, Ge, Mo, Sn)
	BHVO-2G: 6.3% (excluding Si, P, Ti, Mn, Cu, Ga, Ge, Mo, Sn)
	All non-primary reference materials: 9.9% (excluding Si, P, Ti, Mn, Cu, Ga, Ge, Mo, Sn)
References
Jochum, K.P., Willbold, M., Raczek, I., Stoll, B. & Herwig, K., 2005. Chemical characterisation of the USGS reference glasses GSA-1G, GSC-1G, GSD-1G, GSE-1G, BCR-2G, BHVO-2G and BIR-1G using EPMA, ID-TIMS and LA-ICP-MS. Geostandards & Geoanalytical Research 3, 285–302.
Paton, C., Hellstrom, J., Paul, B., Woodhead, J. & Hergt, J., 2011. Iolite: freeware for the visualization and processing of mass spectrometric data. Journal of Analytical Atomic Spectroscopy 26, 2508–2518.
Schaltegger, U., Schmitt, A.K. & Horstwood, M.S.A., 2015. U–Th–Pb zircon geochronology by ID-TIMS, SIMS, and laser ablation ICP-MS: recipes, interpretations, and opportunities. Chemical Geology 402, 89–100.

## Sheet: Data_18Jul2023
	Si29_ppm_mean	Si29_ppm_2SE(int)	P31_ppm_mean	P31_ppm_2SE(int)	Sc45_ppm_mean	Sc45_ppm_2SE(int)	Ti47_ppm_mean	Ti47_ppm_2SE(int)	V51_ppm_mean	V51_ppm_2SE(int)	Cr52_ppm_mean	Cr52_ppm_2SE(int)	Mn55_ppm_mean	Mn55_ppm_2SE(int)	Co59_ppm_mean	Co59_ppm_2SE(int)	Ni60_ppm_mean	Ni60_ppm_2SE(int)	Cu63_ppm_mean	Cu63_ppm_2SE(int)	Zn66_ppm_mean	Zn66_ppm_2SE(int)	Ga71_ppm_mean	Ga71_ppm_2SE(int)	Ge72_ppm_mean	Ge72_ppm_2SE(int)	Rb85_ppm_mean	Rb85_ppm_2SE(int)	Sr88_ppm_mean	Sr88_ppm_2SE(int)	Y89_ppm_mean	Y89_ppm_2SE(int)	Zr90_ppm_mean	Zr90_ppm_2SE(int)	Nb93_ppm_mean	Nb93_ppm_2SE(int)	Mo95_ppm_mean	Mo95_ppm_2SE(int)	Sn118_ppm_mean	Sn118_ppm_2SE(int)	Cs133_ppm_mean	Cs133_ppm_2SE(int)	Ba137_ppm_mean	Ba137_ppm_2SE(int)	La139_ppm_mean	La139_ppm_2SE(int)	Ce140_ppm_mean	Ce140_ppm_2SE(int)	Pr141_ppm_mean
NIST612
NIST612_1	328148	19718.5	38.79	2.87023	40.3704	1.41627	43.345	1.13609	37.1525	1.35908	35.7487	1.01259	37.5469	1.45453	34.1194	1.27641	37.8979	1.1519	35.8247	1.07795	36.9346	1.14471	34.7148	0.856097	34.374	1.12575	29.9626	0.968566	74.605	2.70339	38.4318	1.25009	37.7628	1.0378	38.4435	1.52313	36.0391	1.24574	36.6401	1.17426	40.1666	1.49929	37.5483	1.10002	35.1617	0.960533	36.2469	1.07488	36.5124
NIST612_2	332568	15644.5	48.8643	2.89496	40.205	1.18644	43.9725	1.36933	37.3183	1.95889	36.8576	1.1679	37.8225	1.70438	35.4031	1.16765	38.4554	1.7678	37.8541	1.09802	38.6766	1.35659	36.4727	0.947082	35.6949	1.06431	30.5481	0.674336	75.866	2.47133	38.6147	1.15376	37.8946	1.26808	38.3674	0.986605	37.0077	0.954345	37.986	1.02919	41.7284	1.09538	39.2163	1.18617	35.7477	0.567022	37.2979	1.17078	37.3032
NIST612_3	329599	25976.6	49.2669	4.02776	39.952	1.94406	44.5229	2.78347	38.9913	1.56068	35.9551	1.46847	39.2526	2.72139	35.3301	1.5285	38.4468	1.7467	38.2539	1.39007	38.9328	2.0506	36.3438	1.63163	35.5168	0.970674	31.1651	1.25946	80.1117	2.66563	37.96	1.79994	38.2535	1.25101	39.5386	1.77275	37.1768	1.24042	38.5955	1.85136	42.5281	2.04448	39.0544	1.68849	35.6779	1.23778	38.283	1.71497	37.6937
NIST612_4	346231	12847.9	47.2874	5.27658	40.0598	1.64436	43.4785	1.87248	40.017	1.89025	36.5072	1.73743	38.6251	1.89048	35.8526	2.03236	37.7549	1.16569	37.9597	1.49511	38.992	1.38013	37.161	1.51387	36.0721	0.919214	31.5318	1.6326	77.8079	3.38046	38.9627	1.89268	37.9978	1.40494	39.0165	1.11164	37.4254	2.09941	38.3581	1.72054	42.9385	1.27411	39.4574	1.4075	36.1397	1.38878	38.7192	1.36915	37.8159
NIST612_5	327865	30975.9	46.9454	3.93255	39.9279	1.62401	44.5836	1.64193	38.515	1.99155	37.424	1.68525	39.525	1.93923	35.2912	1.29145	38.8591	1.67242	38.3137	1.49013	39.5023	1.54696	36.8729	1.55388	36.32	1.13691	30.8424	1.18436	79.7819	3.12102	37.7994	1.32627	38.0163	1.44628	38.6194	1.3987	37.7273	1.74908	38.7445	1.43504	43.0649	1.88622	39.4266	1.58614	36.4235	1.27087	38.2899	1.675	38.5601
NIST612_6	336548	15296	52.2664	4.68596	41.0486	0.988957	44.9125	1.37215	40.7972	1.35309	37.8146	1.27146	39.9591	1.30644	36.3839	1.57737	39.6317	1.20694	38.7498	1.08636	40.1565	0.967967	38.2689	0.89461	37.242	0.831558	32.3671	0.805417	79.7919	3.10446	39.3137	0.951535	38.6265	1.01582	39.9782	1.15943	39.0216	0.786358	40.3257	0.662722	43.6643	1.08894	40.9408	1.24829	36.9743	1.13284	39.756	0.914492	39.3124
NIST612_7	334444	14229.1	44.4586	5.08465	39.1841	1.36343	44.2761	1.29198	39.2787	1.07989	36.5036	1.81308	38.973	1.11188	36.2503	1.42285	37.866	1.31943	38.0904	1.14777	39.4301	0.931791	36.7869	1.07647	36.1878	1.09205	31.4681	0.836309	77.7936	3.93103	37.6754	0.673638	37.613	0.855042	38.171	1.23359	37.891	1.29923	38.5107	0.784721	42.6772	1.1387	39.8782	1.19315	35.5292	1.07578	38.7706	0.941785	37.9698
NIST612_8	342992	23951	43.641	3.13169	40.0389	1.26593	43.9434	1.16433	39.4178	1.3323	36.8839	1.06549	39.5627	1.24113	35.6425	1.16001	38.4946	1.37456	37.87	1.01557	39.295	1.55743	37.0512	0.926535	36.2417	0.98298	31.5349	0.866981	78.3349	2.30052	38.7072	1.17243	37.9168	0.868309	39.1024	1.02635	38.3418	1.2792	38.7788	0.988589	43.3202	1.19028	39.4453	1.17601	36.7411	0.866929	38.8474	1.00444	38.5433
NIST612_9	347965	20191.2	50.7123	7.78067	39.0734	1.57735	44.7991	1.88613	39.1538	2.0172	35.5675	1.21221	40.3986	2.41833	35.0685	1.24154	39.1522	2.24554	38.0682	1.29638	39.445	1.36324	37.5165	1.47711	36.183	1.31907	31.5328	0.868527	76.8552	4.05501	37.7262	1.40944	37.1811	1.47436	38.4618	1.48833	37.6703	1.5664	38.953	1.26586	42.8508	1.78876	39.6146	1.14726	35.8209	1.32803	38.598	1.10056	37.9904
NIST612_10	349126	27868.8	48.6065	4.80822	39.5559	1.00077	43.4833	1.00087	38.7146	1.07573	36.7436	1.40033	38.4691	1.23958	35.1534	0.914799	38.5557	1.32933	37.8765	1.11645	39.0507	0.630215	36.9844	0.588477	36.0569	0.967881	31.463	0.754889	76.4812	2.83043	37.6973	0.697775	37.4756	0.913372	38.374	1.07199	37.394	0.630466	39.0198	1.32141	43.2088	1.11329	39.1211	0.830031	36.1269	0.580436	38.3901	0.736436	38.0477
AGV-2G
AGV-2G_1	260063	13158.9	2361.85	174.946	13.8544	0.550193	7384.24	266.327	113.533	5.40499	15.558	0.812541	768.664	35.8508	15.1423	0.591871	17.1782	1.00057	42.6646	1.71347	103.834	4.23213	19.4495	0.770269	1.16291	0.0895849	64.56	2.34308	662.306	26.3353	19.1724	0.822689	235.88	8.34064	13.761	0.466497	1.88228	0.144712	1.94254	0.0958735	1.11501	0.0518469	1101.88	51.5023	37.8002	1.47265	64.8315	2.55195	7.8611
AGV-2G_2	271249	13260.7	2412.78	166.348	13.5683	0.57302	7503.09	252.882	118.032	4.96916	15.3233	0.811217	809.21	38.5079	15.41	0.56323	18.6755	0.716092	42.8462	1.53454	107.14	3.3421	20.4262	0.532465	1.26049	0.145136	66.6981	1.75177	664.728	32.8657	18.17	0.486923	227.705	8.50063	13.9396	0.495881	1.83623	0.117816	1.92493	0.0753045	1.117	0.055994	1078.03	78.1925	36.1744	2.88034	63.4826	6.67061	7.31964
AGV-2G_3	262945	19506.9	2445.03	160.538	13.7523	0.522926	7424.89	198.637	117.215	5.62225	15.4076	0.558836	800.607	22.5875	15.6125	0.64161	18.0877	0.953798	44.3754	1.31789	109.088	3.76633	19.9629	0.779004	1.20849	0.0747992	66.3567	2.46355	654.014	22.5952	18.8056	0.589515	229.294	5.64633	13.954	0.400814	1.91095	0.11312	1.9098	0.0933214	1.15483	0.0325623	1110.73	34.4343	38.2338	0.980943	66.5115	2.66894	7.8758
AGV-2G_4	266174	15120	2386.1	54.8853	13.6644	0.409159	7349.66	212.507	118.767	4.98065	16.0138	0.732384	774.509	31.4162	16.0045	0.576679	17.7864	0.823888	43.3011	1.16449	106.543	1.65098	20.0096	0.791646	1.37282	0.139144	66.397	1.78588	656.632	21.5063	18.7373	0.620319	226.674	6.77533	13.9567	0.345845	1.82852	0.0913499	1.87339	0.0735574	1.13323	0.0604694	1094.37	32.1489	37.7278	0.764065	65.6282	2.18135	7.72048
AGV-2G_5	263109	15361.5	2378.62	173.496	13.6591	0.644733	7270.57	316.37	118.449	2.68855	15.898	0.837173	778.893	33.0273	14.7014	0.669406	18.1302	0.606004	42.6323	2.47198	105.932	3.27469	19.5967	0.802123	1.15829	0.131218	65.6183	3.14047	654.102	25.1819	18.7564	0.618291	228.721	11.1481	13.7233	0.441477	1.89676	0.109146	1.89421	0.0930376	1.14514	0.0452683	1102.33	39.6026	37.6752	1.45585	64.9311	2.65591	7.69294
AGV-2G_6	269440	15841.5	2391.04	169.076	13.763	0.627296	7380.66	263.43	117.143	5.29031	15.5645	0.792218	782.336	39.8932	15.3617	0.718134	17.8346	1.18337	42.5061	1.44332	105.169	5.42305	20.3269	0.503345	1.10455	0.114318	66.2657	2.09577	660.25	29.2811	18.8946	0.827936	229.949	7.89874	13.8103	0.491544	1.85556	0.116816	1.83081	0.0640923	1.13125	0.0434568	1129.46	37.3586	37.4357	1.58113	65.754	2.39009	7.84171
AGV-2G_7	258880	17067.3	2359.26	157.143	13.3416	0.386231	7400.57	257.326	118.698	3.6765	15.0102	0.547607	797.337	34.9889	15.2717	0.64469	17.4349	0.705753	42.8479	1.58195	104.905	2.69837	19.7167	0.602491	1.10561	0.0949313	66.4731	2.10575	645.475	13.4462	18.8241	0.711933	228.334	7.97811	13.7637	0.34784	1.94875	0.100612	1.88121	0.0599692	1.13379	0.041137	1113.29	32.9816	37.5262	1.12228	65.6095	2.12196	7.69743
AGV-2G_8	259714	21076.1	2367.08	163.687	13.6542	0.506113	7235.15	225.538	118.697	5.60908	15.3875	0.703854	783.236	37.7376	15.5059	0.695158	17.1261	0.959555	42.8916	1.45745	105.334	3.52409	19.8092	0.680297	1.1447	0.0937412	66.9943	2.41189	652.507	32.0142	18.8914	0.493491	231.297	8.80788	13.572	0.435098	1.9058	0.114784	1.82956	0.0839627	1.11354	0.0556302	1120.04	42.7568	37.9316	1.43787	65.0328	2.32377	7.74194
AGV-2G_9	255772	12965.5	2390.63	111.856	13.5944	0.367618	7404.18	244.561	116.722	2.63243	16.0128	0.859168	780.905	33.826	15.1821	0.522166	18.0026	0.923286	42.2719	1.08304	106.249	2.65129	19.9678	0.722647	1.32375	0.0742257	65.9423	1.99132	667.758	21.0785	18.9129	0.630052	230.234	6.55614	13.6913	0.381941	1.86532	0.0992818	1.79925	0.0606324	1.15113	0.0502488	1118.56	38.5954	37.8421	1.21904	65.023	1.70261	7.98378
AGV-2G_10	254973	18899.3	2283.94	99.2091	13.9077	0.411718	7388.16	167.538	114.372	5.87055	15.629	0.701447	785.559	31.7673	15.4064	0.614503	17.8217	0.350292	42.2505	1.17707	104.148	2.43993	20.2305	0.378797	1.22586	0.105525	65.2291	1.80989	661.758	24.67	19.3067	0.594764	236.652	4.93729	13.5934	0.351347	1.8295	0.128873	1.9467	0.072028	1.13727	0.0302262	1113.93	34.9312	39.473	0.985204	65.4799	1.8881	7.92031
BCR-2G
BCR-2G_1	235413	14795.4	1771.39	82.9433	36.8654	1.07837	15682.2	429.715	429.857	10.4606	14.8637	0.580359	1525.91	55.7473	36.327	1.10395	10.5982	0.294216	15.1558	0.360369	153.765	4.25046	20.2181	0.647874	1.72769	0.0853677	42.7576	1.44046	338.114	12.2804	35.4533	1.31034	187.757	5.59312	11.7724	0.328307	243.622	7.0105	1.9672	0.0821117	1.04593	0.0404429	639.352	15.1589	25.1121	0.635038	48.1012	1.42365	6.3535
BCR-2G_2	225260	7505.45	1705.91	79.3411	35.9695	0.82733	15394.9	211.553	420.264	12.3402	14.5161	0.67039	1539.55	42.1609	34.324	0.983449	10.5713	0.347412	14.9203	0.351982	149.339	3.83859	20.0669	0.466165	1.54883	0.0831187	43.3924	0.490878	332.951	10.6136	35.4286	0.654847	189.403	2.62836	11.9199	0.247738	242.16	4.91826	1.94314	0.0599646	1.06848	0.0462142	646.279	17.6655	25.3754	0.627549	48.8812	1.40792	6.44337
BCR-2G_3	236182	12908.7	1709.09	117.673	36.276	1.18048	15905.1	517.857	422.402	20.8233	14.9215	0.298713	1539.42	74.3785	35.8047	1.16158	11.5062	0.75673	15.356	0.673566	152.329	4.2539	20.4895	0.765018	1.6576	0.0984547	43.791	1.47338	339.97	12.243	35.9974	0.801567	194.038	5.86254	12.0587	0.42634	243.575	5.86593	1.96593	0.061151	1.05383	0.0370569	661.793	22.7588	25.6662	0.826963	50.2328	1.85246	6.50228
BCR-2G_4	240554	14294.8	1685.19	116.724	36.3612	1.4647	15563.1	495.352	430.922	24.1959	14.47	0.364557	1526.83	56.6958	35.7039	1.62905	11.4016	0.550916	15.1511	0.448196	151.464	4.75106	20.5077	0.666022	1.72545	0.106987	44.2826	1.56868	338.093	11.9832	35.7224	1.31701	190.769	6.10177	12.0089	0.349337	245.919	7.05674	1.96072	0.0730683	1.06934	0.0404595	671.099	19.4459	25.2012	0.768038	50.1412	1.57469	6.54682
BCR-2G_5	227950	11757.1	1744.37	143.698	37.2435	1.58442	15752.7	518.363	431.124	25.9489	15.5479	0.814637	1533.46	86.0867	35.9855	1.65015	11.3243	0.626777	15.3756	0.542286	153.194	5.98321	21.0299	0.894841	1.57729	0.0933526	44.8409	1.51494	338.878	15.514	36.1306	1.47354	191.631	6.34991	12.0313	0.514066	249.024	9.36315	1.97096	0.0937264	1.09673	0.0377754	677.541	27.5619	25.7386	1.0307	50.2099	1.61959	6.75635
BCR-2G_6	226708	16928	1619.91	117.745	36.2628	1.22389	15693.8	455.528	426.413	24.9231	14.974	0.628237	1497.62	62.8955	37.0164	1.31766	11.0989	0.724276	15.2178	0.736408	151.277	4.539	20.5065	0.75171	1.66481	0.0797359	44.2397	1.63372	339.086	12.2717	35.6598	1.51398	190.707	6.44814	11.9877	0.429278	246.334	10.7326	1.94514	0.0859183	1.07486	0.0381502	661.489	23.5021	25.5049	0.826394	50.0389	1.81761	6.53797
BCR-2G_7	253005	20535.5	1803.04	100.089	37.5107	1.13399	16172.3	424.067	436.969	23.241	15.1721	0.660191	1554.04	87.2988	36.988	1.46473	11.4663	0.6892	15.5415	0.488908	155.694	4.63066	21.1552	0.864094	1.74703	0.122428	45.552	1.54803	347.623	14.7628	36.4259	1.41607	194.619	5.8841	12.3017	0.565844	254.978	10.6794	2.05835	0.078011	1.111	0.0430454	685.615	26.5557	26.5877	0.912091	51.1317	1.15621	6.64998
BCR-2G_8	230722	13353.5	1692.04	101.05	36.2407	1.34338	15822.7	669.455	427.308	23.7215	14.9739	0.499665	1535.67	106.693	35.6495	1.19903	11.1587	0.663467	14.8331	0.411333	152.452	6.54179	20.529	0.736798	1.69094	0.115577	44.1826	1.57636	333.389	16.703	35.3205	1.23963	189.528	6.55114	11.8701	0.526997	249.595	8.49516	2.03607	0.108266	1.11991	0.0577114	657.432	25.4383	25.3495	0.928156	50.5866	1.84864	6.59709
BCR-2G_9	236800	17162	1722.72	68.4347	36.4689	1.09349	15683.2	448.878	432.171	17.4047	15.0243	0.524171	1552.37	61.2892	35.0838	1.19846	11.4146	0.416343	15.0004	0.4574	152.801	5.82678	20.9043	0.574589	1.5801	0.0923943	43.8578	1.74392	346.82	13.0532	35.381	1.16278	189.012	6.71196	11.8708	0.354197	248.252	6.73138	1.99585	0.0900024	1.08473	0.0548965	666.89	24.0334	25.3732	0.782548	50.7495	1.59604	6.61602
BCR-2G_10	226016	13876.4	1666.64	54.3184	35.9926	0.441129	15630	384.245	428.112	9.35679	15.0057	0.375438	1518.75	51.2728	35.0529	1.47897	11.3526	0.527449	15.227	0.434424	150.987	3.54472	20.3142	0.503407	1.70764	0.0741213	43.1152	1.04972	346.209	9.73261	35.544	0.822025	191.015	4.39178	11.8422	0.288708	248.064	5.11183	2.00856	0.0620693	1.05755	0.0276246	663.254	10.957	25.5497	0.422792	50.3987	0.834442	6.55842
BHVO-2G
BHVO-2G_1	216490	9401.46	1337.48	60.2511	34.7794	0.922633	19369.3	574.57	305.203	8.10149	284.547	8.72929	1288.41	41.2287	44.009	1.10023	112.319	5.14057	115.029	3.34507	118.578	2.775	20.4488	0.592489	1.71298	0.114386	8.73425	0.26945	389.524	13.4496	25.8155	0.783345	171.93	5.40055	17.5496	0.416418	3.97558	0.163431	1.5779	0.0366106	0.0955852	0.00509359	126.81	2.94728	15.552	0.416907	35.4492	1.1585	5.05164
BHVO-2G_2	207940	7723.65	1316.17	76.7614	33.8955	1.58095	19131.5	662.58	316.539	15.498	276.131	13.8908	1274.23	50.5816	43.6446	2.29757	113.215	5.58203	114.276	4.0654	113.886	3.73317	20	0.630081	1.62127	0.139132	8.64947	0.410588	392.685	17.6689	25.1424	1.12332	172.281	5.809	17.3042	0.714554	3.9758	0.235077	1.57851	0.0870459	0.0944629	0.00970261	126.583	5.06588	15.3694	0.589031	35.3137	1.68467	5.134
BHVO-2G_3	215922	14481.2	1277.88	55.9096	33.845	1.20958	18862.5	555.984	305.202	15.3449	274.477	13.978	1312.44	62.354	42.0337	1.71948	113.58	4.46093	112.361	3.86779	115.311	4.28197	20.019	0.888699	1.69852	0.148579	8.54304	0.379952	399.644	15.9729	24.9985	1.09702	171.519	7.465	17.3715	0.592278	3.99387	0.165449	1.61308	0.11447	0.090159	0.00462069	126.424	4.23259	15.4158	0.521992	35.3496	1.01519	5.03253
BHVO-2G_4	216248	11674.5	1331.21	98.8543	35.2171	1.64992	19150.9	753.824	308.725	16.7231	279.135	8.37666	1309.14	68.179	42.778	1.76646	116.406	5.47376	114.348	4.49051	115.171	4.51303	20.2737	0.690778	1.75417	0.14126	8.67618	0.354365	398.586	14.2949	25.7264	0.89457	175.408	7.23505	17.6397	0.647971	4.07981	0.253475	1.55414	0.0734916	0.0918088	0.0100066	128.267	5.67134	15.6748	0.468468	35.812	1.50476	5.19373
BHVO-2G_5	226592	13246.6	1390.89	128.685	35.5645	1.65633	19507.8	823.902	325.078	23.2593	272.893	10.3045	1354.13	60.867	42.8255	1.9233	116.456	8.99489	115.71	3.45464	116.366	3.91818	20.4302	0.759896	1.76487	0.120046	8.73703	0.362195	397.891	11.9258	26.3239	0.885047	178.014	6.93847	17.7384	0.759005	4.06593	0.097277	1.60521	0.0506103	0.097437	0.00845007	131.098	3.93802	16.0026	0.619181	36.0753	1.31031	5.25452
BHVO-2G_6	210182	10213.8	1297	93.8311	34.7994	1.56343	19086.8	727.294	312.907	14.9955	276.508	14.1119	1303.6	67.5031	42.6881	1.92443	112.529	5.78997	112.959	4.6238	114.193	5.10449	19.9236	0.630398	1.83028	0.143748	8.64408	0.309045	401.661	14.6279	25.51	0.765648	175.293	6.19082	17.58	0.728404	4.00993	0.301447	1.53968	0.0737625	0.0958799	0.00690402	129.083	5.48917	15.8485	0.772382	36.0896	1.3826	5.17581
BHVO-2G_7	204879	5540.4	1246.12	77.2311	34.0328	1.02857	18922.6	519.862	302.036	11.7057	271.035	9.47503	1269.83	43.3041	42.1466	1.95521	110.593	5.42975	109.672	3.94801	111.514	3.31269	19.6161	0.752324	1.69059	0.121628	8.30392	0.247702	400.046	15.9583	25.3301	0.574022	172.86	5.69421	17.5219	0.634902	3.88725	0.114669	1.55062	0.0771183	0.0817922	0.00814525	128.862	5.25307	15.4636	0.361622	35.6858	0.999761	5.10654
BHVO-2G_8	220284	7271.34	1319.59	76.5984	35.2858	1.20739	19284.6	490.697	315.192	11.1969	270.958	8.08706	1321.69	66.7086	42.9311	1.36799	113.734	3.9732	110.405	2.91389	117.335	3.66302	19.8211	0.352147	1.66965	0.16628	8.49611	0.294118	401.452	10.3906	26.2791	0.792513	178.624	3.21593	17.642	0.525955	3.98845	0.115789	1.5961	0.0591916	0.0988688	0.00666892	129.703	3.77883	15.89	0.409522	36.2673	0.844143	5.25289
BHVO-2G_9	215420	7989.32	1284.88	88.7159	34.6479	1.23723	19207.6	631.416	304.999	12.7813	273.062	13.7294	1316.11	65.4749	43.2213	1.62976	111.834	6.84923	110.52	3.81354	114.78	4.64	19.9658	0.676577	1.66853	0.103959	8.53504	0.243115	396.439	15.6785	26.5288	0.738911	178.776	5.64911	17.8637	0.475112	3.84805	0.154812	1.56433	0.0483508	0.0859187	0.00898862	131.116	4.24268	15.9473	0.473493	36.4125	0.85878	5.29982
BHVO-2G_10	215965	9152.34	1297.73	58.1214	35.1713	1.19765	19091.3	552.013	309.598	18.5863	272.592	9.08015	1329.91	52.9913	42.4792	1.53286	113.123	4.63173	109.941	3.00554	115.822	4.03289	19.8796	0.662225	1.66849	0.178823	8.40792	0.214679	405.677	16.702	25.9339	0.755509	176.566	4.8952	17.7318	0.422665	3.9806	0.173149	1.55965	0.112149	0.0939639	0.00810815	129.574	3.56568	15.6858	0.544139	35.9441	1.27216	5.29023
NL22-04
NL22-04_1	328157	68772.6	125.376	104.36	12.6187	2.35178	1864.48	291.806	32.7749	5.32231	8.0978	4.1357	554.082	78.3253	63.0604	7.67535	39.9308	7.19483	5.49567	0.814771	40.5334	6.8291	11.0671	2.01541	-0.558658	1.2731	14.2839	2.33942	120.793	17.6292	12.562	2.1859	67.592	13.5916	0.960989	0.248561	1.03329	0.30871	0.988749	0.436149	0.190671	0.071789	175.315	37.1475	2.85874	0.663951	7.75138	1.93005	0.917644
NL22-04_2	338622	39402.3	242.559	85.1031	14.4127	1.90906	2130.19	316.615	40.0621	7.42424	9.59339	4.09083	625.21	79.6272	70.3443	6.91518	45.4473	6.70158	6.32533	1.19805	45.4728	6.75828	12.3395	1.77076	1.29737	1.67018	15.7327	2.07357	135.945	17.461	14.7037	2.21173	77.7088	11.8347	1.13696	0.200188	0.716613	0.287789	0.911795	0.282301	0.204677	0.0656116	200.843	21.6307	3.58277	0.322666	10.7791	2.44193	1.04784
NL22-04_3	319144	36125.1	377.728	84.066	14.8738	1.83889	2175.69	242.848	38.1407	4.43376	15.6571	7.39915	673.903	65.9508	73.8597	7.49622	52.8155	9.71114	6.14178	0.660547	43.8236	4.36323	12.7403	1.62103	0.568803	1.52648	15.8847	1.60756	146.818	19.6264	15.5207	1.60638	82.575	8.80891	1.11664	0.223156	0.694706	0.323289	0.784121	0.231486	0.251542	0.086641	211.462	19.596	3.87384	0.462112	9.39191	0.84645	1.1601
[truncated: 33 more columns]

## Sheet: Details_26Jan2024
Laboratory and sample preparation details
Laboratory name	Tectonics, Metamorphic Petrology & Orogeny (TeMPO) Laboratory, Johns Hopkins University
Sample type/mineral	Whole-rock glass
Sample preparation	Powdering of 40–100 g of fresh rock in tungsten carbide ring-and-puck-mill; flux melting of 0.4 g of resulting rock powder with 3.6 g of lithium tetraborate; glass disks broken and shards mounted in 1 inch epoxy round then ground to maximum exposure then polished to 0.3 µm SiC paste finish
Laser ablation system details
Make, Model and type	Teledyne (Photon Machines) Analyte G2
Ablation cell and volume	HelEx II active two-volume ablation cell
Laser wavelength (nm)	193 nm ArF Excimer
Pulse width	4 ns
Fluence	4.0 J cm-2
Repetition rate	10 Hz
Ablation duration	60 s
Analytical 'spot' shape and size	Square; 50 µm x 50 µm
Sampling mode / pattern	Constant speed line raster
Raster velocity	10 µm s-1
Cell carrier gas flows	0.3 L min-1 He flow into ablation cup; 0.5 L min-1 He flow into ablation cell
Inductively-coupled-plasma mass spectromer (ICP-MS) system details
Make, model, type, analytical mode	Agilent Technologies 8900 triple quadrupole ICP-MS, operating in single quad mode
Sample introduction	1 cm inner diameter PFA tubing with inline Teledyne 'SQUID' smoothing device, 2.5 mm quartz injector; 5 cm sampling depth; Ni cones, high-sensitivity skimmer insert
RF power	1550 W
Make-up gas flow and position	0.90 L min-1 Ar, between cell and torch
Detection system	Single ion-counting SEM
Masses measured (and dwell times)	29 (10 ms); 31,43,51,52,55,59,60,88 (50 ms); 45,47,63,66,71,72,85,89,90,93,95,118,133,137,139,140, 141,146,147,153,157,159,163,165,166,169,172,175,178,181,208,232,238 (100 ms)
Total integration time	3.761 s
‘Sensitivity’ as useful yield	0.003%–0.005% U [100 x (#ions detected / #atoms sampled); Schaltegger et al. (2015)]
IC Dead time	41.6 ns
Data processing details
Gas blank	15 s on-peak zero subtracted
Calibration and standardsl strategy	NIST612 as primary reference material for geochemistry, AGV-2G, BCR-2G and BHVO-2G to assess accuracy
Common-Pb correction	No common-Pb correction applied
Data processing packages	Iolite v4.6.1 (Paton et al., 2011), using the Trace Elements Next data reduction scheme and a mean–median fit to the standard data
Uncertainty level and propagation	Elemental abundances in "Data_" sheets are ppm with 2σ internal uncertainty calculated from counting statistics of the ICP-MS. Uncertainty for each element–non-primary reference material combination calculated from % difference between measured and accepted value (accuracy) added in quadrature to the 2σ internal uncertainty. Session uncertainty calculated by 2sd value of above-calculated uncertai…
Discordance criteria	Discordance reported as the relative difference between the measured 207Pb/235U and 206Pb/238U dates; calculated as |1–(206Pb/238U date)/(207Pb/235U date)| and reported as %
Interpreted age transition	The transition from preferred interpretation of 207Pb/206Pb (for older) to 206Pb/238U (for younger) dates set at 850 Ma
Quality control and validation (materials)	AGV-2G (Jochum et al., 2005)
	BCR-2G (Jochum et al., 2005)
	BHVO-2G (Jochum et al., 2005)
Quality control and validation (results)	AGV-2G: 16.5% (excluding Si, P, Ti, Mn, Cu, Ga, Ge, Mo, Sn)
	BCR-2G: 12.9% (excluding Si, P, Ti, Mn, Cu, Ga, Ge, Mo, Sn)
	BHVO-2G: 17.9% (excluding Si, P, Ti, Mn, Cu, Ga, Ge, Mo, Sn)
	All non-primary reference materials: 16.0% (excluding Si, P, Ti, Mn, Cu, Ga, Ge, Mo, Sn)
References
Jochum, K.P., Willbold, M., Raczek, I., Stoll, B. & Herwig, K., 2005. Chemical characterisation of the USGS reference glasses GSA-1G, GSC-1G, GSD-1G, GSE-1G, BCR-2G, BHVO-2G and BIR-1G using EPMA, ID-TIMS and LA-ICP-MS. Geostandards & Geoanalytical Research 3, 285–302.
Paton, C., Hellstrom, J., Paul, B., Woodhead, J. & Hergt, J., 2011. Iolite: freeware for the visualization and processing of mass spectrometric data. Journal of Analytical Atomic Spectroscopy 26, 2508–2518.
Schaltegger, U., Schmitt, A.K. & Horstwood, M.S.A., 2015. U–Th–Pb zircon geochronology by ID-TIMS, SIMS, and laser ablation ICP-MS: recipes, interpretations, and opportunities. Chemical Geology 402, 89–100.

## Sheet: Data26Jan2024
	Si29_ppm_mean	Si29_ppm_2SE(int)	P31_ppm_mean	P31_ppm_2SE(int)	Sc45_ppm_mean	Sc45_ppm_2SE(int)	Ti47_ppm_mean	Ti47_ppm_2SE(int)	V51_ppm_mean	V51_ppm_2SE(int)	Cr52_ppm_mean	Cr52_ppm_2SE(int)	Mn55_ppm_mean	Mn55_ppm_2SE(int)	Co59_ppm_mean	Co59_ppm_2SE(int)	Ni60_ppm_mean	Ni60_ppm_2SE(int)	Cu63_ppm_mean	Cu63_ppm_2SE(int)	Zn66_ppm_mean	Zn66_ppm_2SE(int)	Ga71_ppm_mean	Ga71_ppm_2SE(int)	Ge72_ppm_mean	Ge72_ppm_2SE(int)	Rb85_ppm_mean	Rb85_ppm_2SE(int)	Sr88_ppm_mean	Sr88_ppm_2SE(int)	Y89_ppm_mean	Y89_ppm_2SE(int)	Zr90_ppm_mean	Zr90_ppm_2SE(int)	Nb93_ppm_mean	Nb93_ppm_2SE(int)	Mo95_ppm_mean	Mo95_ppm_2SE(int)	Sn118_ppm_mean	Sn118_ppm_2SE(int)	Cs133_ppm_mean	Cs133_ppm_2SE(int)	Ba137_ppm_mean	Ba137_ppm_2SE(int)	La139_ppm_mean	La139_ppm_2SE(int)	Ce140_ppm_mean	Ce140_ppm_2SE(int)	Pr141_ppm_mean
NIST612
NIST612_1	352764	10542.3	51.2686	4.9803	40.4439	1.46083	44.4561	1.6381	38.3735	2.44567	36.2082	0.891843	38.5469	2.59693	36.0131	0.7894	38.4106	2.00635	38.2379	1.43559	38.4135	1.5534	35.9889	1.09764	35.8365	1.38639	30.2936	1.21366	76.8289	1.98467	37.4761	1.29003	37.5263	1.57706	38.3833	1.63057	36.7203	1.49749	38.0112	1.62653	41.7314	1.52391	38.5655	1.29455	35.4668	1.62868	37.7818	1.61843	36.573
NIST612_2	343851	27100.8	46.998	3.10335	39.7585	1.68904	43.9842	1.73456	39.8202	2.22293	37.4003	1.1988	38.5351	2.23916	36.2647	1.3075	39.9217	2.74397	38.3251	1.69141	38.9009	1.64642	36.8269	1.58276	35.8582	1.18799	31.1801	1.20839	76.2984	2.59799	37.9696	1.34599	37.7009	1.77986	38.8719	1.61603	36.8109	1.52793	38.0761	1.43385	41.8985	1.70891	38.6927	1.47646	35.9353	1.28692	37.2319	1.20492	37.6977
NIST612_3	341852	14407.3	44.5521	5.29793	40.4852	1.96796	44.3398	2.47075	38.5283	3.03727	36.9286	0.894423	38.9351	2.79604	35.2691	1.00278	39.8717	3.03202	38.6364	1.76384	39.0587	1.92047	37.5888	1.68108	36.4745	1.46264	32.1004	1.5136	78.1031	2.82763	38.6958	2.06693	37.8452	1.89554	38.8957	1.5987	37.5869	1.90677	39.4289	1.72109	43.1828	2.14125	39.4758	1.71379	36.7448	1.95148	39.337	1.85609	38.459
NIST612_4	344865	26566	47.8543	3.99248	39.3423	2.12793	43.6514	2.22089	38.6875	3.00706	36.2177	1.18534	38.349	2.71899	34.9654	1.46644	38.8098	2.84448	37.6388	1.4479	39.0843	1.99759	37.0955	1.7505	35.9386	1.83487	31.0199	1.37703	78.6201	4.76546	38.0874	2.06662	37.5485	1.80664	38.9175	2.37897	37.0703	1.60747	38.5496	1.63684	42.5625	2.09762	39.4005	1.8231	36.179	1.7775	38.6855	1.68253	37.7806
NIST612_5	343314	21753.6	50.3436	4.34849	39.8729	1.70343	43.2023	2.06528	38.7867	2.67914	36.6315	0.739576	38.5297	3.09984	35.9497	1.31576	39.2026	3.20364	38.0828	2.21412	38.975	1.6654	36.4803	1.62457	35.9624	1.55754	31.0868	1.44017	77.411	3.06466	38.0145	1.64418	38.0001	1.89025	38.7915	1.84438	36.5867	2.22892	38.376	1.68348	42.886	2.0594	39.3172	1.59748	35.3378	1.80363	38.4513	1.46898	37.715
NIST612_6	350988	33881.9	47.7148	4.98253	40.6191	1.77507	43.9984	2.07383	39.1339	2.62294	37.0774	1.07483	39.6266	2.96546	36.1319	0.824826	39.9806	3.11763	38.6267	1.74618	39.2009	1.47716	37.8771	1.75141	36.5128	1.58065	31.895	1.34268	79.7487	3.84151	38.9173	1.50969	39.549	1.89003	40.1979	2.00111	38.1972	1.85046	40.0272	1.5583	44.3444	2.30177	40.6803	1.95775	37.3376	1.922	39.619	1.77916	39.0739
NIST612_7	340881	18260.4	46.2785	4.84323	40.6921	1.77456	44.8805	1.74469	39.6582	2.79028	36.5343	1.13179	39.351	2.3326	36.0893	0.547834	39.0078	2.84826	39.0429	1.54149	40.1011	1.74697	37.9552	1.5521	36.7866	1.57647	32.3405	1.17069	80.6942	3.91228	39.0493	1.66715	39.4083	1.78437	39.7269	1.93657	37.7221	1.72807	39.3351	1.60035	43.5725	1.59311	39.9499	2.0019	36.9865	1.74646	38.8565	1.54797	38.7834
NIST612_8	333689	28040.8	46.3174	3.63829	40.1075	1.63595	42.8828	1.87223	38.0528	2.67212	36.0781	1.25924	38.756	2.55787	35.678	0.719283	39.106	2.39624	37.3555	1.31395	38.4744	1.45035	36.7064	1.34082	35.8672	1.31968	31.4476	1.0762	78.9909	3.31677	38.1492	1.52853	38.3556	1.68901	38.8753	1.48005	36.4655	1.13114	38.685	1.55819	42.6687	1.63645	39.2898	1.61634	35.7957	1.31407	38.207	1.35796	37.5909
NIST612_9	342148	18607.3	46.3069	6.148	40.4888	1.51539	43.5654	1.85492	38.9583	2.99449	35.5925	0.963711	38.5067	2.61896	34.9476	0.872131	38.6655	2.78133	37.2305	1.6829	38.9145	1.57935	36.2477	1.39901	35.6394	1.33879	31.3813	1.34768	78.522	2.87954	38.6807	1.67141	38.1721	1.73924	39.0961	1.48663	36.5572	1.77765	38.838	1.44741	41.9849	1.70563	39.4254	1.53293	36.1611	1.77415	38.6401	1.49149	37.6545
NIST612_10	347176	24538.8	46.1275	4.33546	40.4216	1.43665	44.3529	1.65336	38.7869	2.36549	36.8284	1.03378	38.584	2.13144	35.5413	0.558792	38.4769	2.50171	37.3982	1.33159	38.4451	1.28521	37.2254	1.06915	36.1318	1.08307	31.4322	1.05968	79.4533	3.13198	38.6567	1.3685	38.5811	0.969364	39.4417	1.61671	37.4329	1.3786	38.9191	1.2729	42.386	1.34211	40.2399	1.60394	36.5129	1.23633	38.4791	1.05776	38.307
AGV-2G
AGV-2G_1	274394	9278.18	2173.72	115.584	12.6482	0.306248	6625.06	127.578	119.465	3.08513	15.7272	0.42144	750.239	24.2302	15.6077	0.34791	17.6787	0.904674	45.5899	1.14877	98.7871	2.80962	19.9757	0.57126	1.46167	0.0851573	67.2194	1.68561	653.917	15.6309	17.0272	0.412343	208.129	6.25043	13.0931	0.320701	1.88799	0.105112	2.00986	0.0718833	1.15754	0.0391436	1118.18	30.0031	35.9885	1.05539	67.247	1.77069	7.45513
AGV-2G_2	286905	16572.5	2194.06	107.099	12.8356	0.346031	6798.5	129.309	122.486	2.80007	15.9254	0.674164	764.545	16.8308	15.9504	0.378159	18.7949	0.482001	47.5646	1.21291	101.689	2.60291	20.7859	0.524653	1.57918	0.0916755	68.8737	1.45025	665.539	13.8713	17.1506	0.417711	209.792	5.61573	13.3727	0.304278	1.89939	0.0794076	2.0097	0.069895	1.1638	0.0326608	1126.45	29.9017	36.8102	0.937985	67.4454	1.45592	7.63145
AGV-2G_3	260243	16951.1	2066.26	131.959	12.1918	0.278211	6663.49	174.108	119.223	3.55231	16.0559	0.471827	758.867	25.3341	16.1021	0.426457	18.2028	0.657399	46.8267	1.19537	100.034	2.14912	20.3255	0.487746	1.27718	0.0729892	68.388	1.58634	664.007	20.8364	17.0831	0.343211	209.147	5.68026	13.3066	0.228694	1.97723	0.104434	1.97845	0.0531169	1.17377	0.0294969	1122.88	23.2526	36.577	0.940219	68.3359	1.30681	7.69234
AGV-2G_4	288367	15189.3	2241.98	91.9277	12.6436	0.298913	6812.43	113.495	123.569	3.78797	16.7779	0.58567	774.315	19.8052	16.2304	0.276685	18.5317	0.495647	47.4237	1.29179	103.348	2.28393	20.8967	0.552566	1.5944	0.104177	68.9026	1.54364	673.478	15.9256	16.9181	0.502864	208.427	4.86525	13.2651	0.364408	1.96703	0.104037	1.95446	0.0656962	1.20872	0.0412495	1131.69	26.4263	36.8312	0.995234	68.0927	1.70151	7.72451
AGV-2G_5	283131	17902.6	2267.68	140.546	12.3229	0.414955	6700.36	160.495	123.487	4.70857	15.9099	0.464702	765.684	32.3379	15.6864	0.404054	18.7265	0.774966	47.0376	1.06068	102.117	2.7884	20.7542	0.412794	1.47936	0.0758802	69.5235	1.88562	662.459	20.6577	16.6296	0.568582	202.239	7.81173	13.2098	0.398793	1.88227	0.0920243	1.94696	0.0718425	1.18349	0.0357166	1124.55	27.4425	35.571	0.969665	68.1098	2.24182	7.47384
AGV-2G_6	270937	12928.1	2201.37	105.25	12.4287	0.37476	6736.75	188.325	120.533	3.69474	15.8042	0.618542	776.006	24.3319	16.2535	0.492856	18.3112	0.769376	46.9471	1.41981	102.124	2.67784	20.5555	0.560216	1.4302	0.131438	68.9634	1.83996	664.428	20.3615	16.7424	0.607735	203.631	5.54443	13.1896	0.442873	1.98391	0.112151	1.94535	0.100619	1.16291	0.0248753	1116.18	31.503	35.6944	0.953961	68.3039	2.3122	7.59636
AGV-2G_7	283671	19224.4	2242.75	151.024	12.3184	0.466916	6782.06	233.62	122.133	7.19916	15.7777	0.554554	776.133	41.395	16.1391	0.225572	18.0058	1.1022	46.9689	1.60059	102.38	3.26829	20.8971	0.764168	1.43763	0.109016	69.7032	2.32194	659.168	17.0473	16.4757	0.693438	204.19	6.4378	13.2403	0.507626	2.02539	0.113985	1.89324	0.0907816	1.1781	0.0488193	1131.18	41.7001	35.8372	1.20349	67.7844	1.99468	7.56685
AGV-2G_8	285215	22826	2227.5	165.299	12.5833	0.544668	6781.23	250.946	123.102	8.25468	16.1294	0.640976	783.162	52.2822	16.3957	0.425787	17.8988	1.29691	46.8524	2.29167	102.681	3.5789	21.1154	1.00971	1.39852	0.103985	69.6453	2.70874	659.149	26.5053	16.5878	0.731008	202.779	8.42816	13.5024	0.663119	1.9287	0.109609	1.9794	0.0953077	1.16761	0.0464436	1136.86	56.0152	36.1187	1.3877	68.8059	3.0437	7.61493
AGV-2G_9	276164	13337.8	2213.94	109.841	12.4505	0.423365	6775.99	217.105	123.996	6.63812	15.9426	0.531749	776.592	36.5855	15.9611	0.362971	18.6506	1.214	47.2807	1.36179	102.7	3.57108	20.9839	0.761742	1.38928	0.083648	69.3222	2.18588	660.362	23.4441	16.5411	0.606699	203.396	6.02964	13.2929	0.40878	1.90751	0.0974089	2.021	0.0819743	1.19345	0.0466384	1133.39	38.8592	36.0739	1.38447	67.9375	2.17441	7.57003
AGV-2G_10	281099	17791	2294.81	159.961	12.4332	0.344725	6811.53	211.776	124.518	6.34547	16.3774	0.486193	791.185	34.2304	16.2744	0.396907	19.0138	0.837309	47.5311	1.94094	103.625	3.08046	20.5706	0.93511	1.48304	0.107082	70.1406	1.48159	673.745	20.6726	16.5299	0.473585	205.175	5.72233	13.2381	0.444296	1.86923	0.265916	2.04637	0.104268	1.17582	0.0525421	1123.37	38.7002	35.2237	1.41842	68.6745	2.63308	7.575
BCR-2G
BCR-2G_1	247249	7187.43	1565.82	45.3194	33.2064	0.554441	14578.5	189.916	431.064	10.458	15.5314	0.306589	1498.42	31.0456	37.3608	0.577325	11.17	0.421517	15.8525	0.263844	148.43	2.29032	21.8108	0.403593	1.68736	0.0965835	46.1235	0.713392	336.657	5.08785	31.8719	0.660189	168.142	2.98648	11.3733	0.231904	254.411	3.50187	2.03943	0.0540034	1.11163	0.0405393	656.56	10.6789	24.0162	0.42467	50.9991	0.904011	6.30769
BCR-2G_2	246585	10572.3	1567.77	79.6054	32.5666	0.762162	14391	268.544	420.632	13.0885	15.7587	0.441622	1492.79	53.9394	37.201	0.581678	11.4339	0.527555	15.6751	0.391184	145.79	2.69548	21.3324	0.550476	1.72919	0.0874688	45.597	1.06057	333.119	6.43764	30.4633	0.807302	163.385	4.04034	11.3645	0.252407	250.033	5.11755	2.04857	0.0908927	1.1366	0.0255023	657.401	13.8295	23.5279	0.667154	50.6635	1.15654	6.19768
BCR-2G_3	255287	9725.95	1628.59	72.2902	32.7439	0.94022	14733	362.455	433.556	15.5716	16.207	0.322914	1539.48	60.7322	38.0997	0.750533	11.6943	0.781976	15.9313	0.42729	150.207	4.58827	22.0445	0.612955	1.56587	0.101177	47.0685	1.33919	341.239	9.90208	31.4115	0.885478	168.725	3.86356	11.5772	0.342195	257.153	7.10772	2.10072	0.0805354	1.13401	0.0398011	673.217	19.2933	23.935	0.794581	52.4602	1.39882	6.36697
BCR-2G_4	250799	11886.6	1599.99	77.207	32.6847	0.854726	14692.4	387.845	434.516	17.6083	15.9797	0.442012	1545.98	70.8246	37.9118	0.557293	11.8067	0.455838	15.7809	0.550463	154.206	4.16805	21.8828	0.749536	1.65394	0.079401	46.5121	1.16268	334.278	9.40666	31.3287	0.724134	167.705	5.23119	11.489	0.308711	253.089	7.97715	2.07425	0.0889479	1.12916	0.0548424	668.718	19.7136	24.1394	0.850109	52.4353	1.51707	6.43946
BCR-2G_5	254813	11694.3	1598.58	90.9987	33.32	1.05323	14954.3	390.235	443.087	15.97	15.9738	0.474138	1554.65	71.5715	38.7204	0.908389	12.186	0.635179	16.2623	0.596741	152.897	3.60806	22.3236	0.546507	1.73698	0.120519	47.3339	1.07498	347.64	7.88537	31.3511	0.862916	169.389	4.45364	11.7617	0.271076	259.643	6.82374	2.05043	0.0726019	1.16528	0.0356536	678.176	17.4365	24.2629	0.604246	52.8071	1.42324	6.46454
BCR-2G_6	243557	7895.69	1569.21	71.546	31.9007	0.520787	14584.5	226.873	430.482	10.5492	15.7282	0.35874	1518.9	36.6898	37.5254	0.737634	11.5039	0.489979	15.783	0.368945	147.626	3.39134	21.6893	0.471869	1.78678	0.103077	46.7392	1.11599	339.054	6.57068	30.3527	0.553434	164.497	3.37303	11.4454	0.219133	253.846	4.4266	2.05155	0.0765575	1.12225	0.0287596	664.341	14.5443	23.5832	0.475762	51.5951	0.980456	6.28192
BCR-2G_7	245134	13941.9	1545.43	79.0645	31.5758	0.511533	14666.1	209.557	433.644	12.9582	15.4244	0.375505	1507.3	54.7035	37.996	0.741908	11.7326	0.58016	15.665	0.454278	148.443	3.57825	21.6246	0.566609	1.62881	0.0922414	46.2719	1.25326	339.989	7.09719	29.2497	0.647795	159.927	3.72899	11.5155	0.245484	254.638	6.78998	2.03968	0.0706392	1.13732	0.0273187	666.621	17.4866	23.3042	0.626094	51.36	1.29	6.28115
BCR-2G_8	253121	9454.89	1619.14	60.0132	32.717	0.702265	14782.4	283.938	433.616	12.7422	16.0425	0.353425	1541.44	48.8174	38.0328	0.439841	11.7586	0.409757	15.5301	0.304556	149.462	2.29033	21.8037	0.387938	1.76643	0.0765827	46.7348	0.85674	341.321	7.32148	31.1857	0.629061	168.063	2.87679	11.5919	0.209745	254.607	5.18525	2.08201	0.0689206	1.13536	0.031559	665.144	11.6535	23.7995	0.573053	51.8968	0.947791	6.41038
BCR-2G_9	246607	9404.79	1615.57	64.0152	33.1753	0.715184	14808.8	292.953	438.038	16.9288	15.9499	0.409218	1556.98	54.1851	38.6057	0.508152	11.7692	0.582448	15.9851	0.329173	151.583	3.01358	22.3051	0.463071	1.67953	0.0970284	46.9922	0.743847	344.594	8.89948	31.7329	0.696186	170.14	4.04024	11.6315	0.178171	255.444	5.19584	2.06239	0.0573339	1.14766	0.0308595	676.684	12.106	24.0374	0.557817	52.5422	0.846083	6.4752
BCR-2G_10	246695	9207.45	1579.45	78.9423	32.963	0.801474	14781.8	275.372	440.839	16.2257	15.9601	0.468867	1539.66	50.844	38.2024	0.395402	11.7912	0.569936	16.2488	0.626387	152.427	3.21339	22.1668	0.38927	1.56274	0.0921795	46.4984	0.99385	336.349	6.16571	31.3209	0.66566	168.086	4.27049	11.5179	0.301783	255.187	5.27028	2.1034	0.0524351	1.12168	0.0308246	668.639	17.0305	24.0578	0.474264	51.7307	1.10602	6.35674
BHVO-2G
BHVO-2G_1	226782	7585.06	1196.76	33.0046	30.7	0.711886	17736.8	334.677	330.665	8.45401	287.82	7.07797	1314.84	38.6034	45.6907	0.862477	118.986	2.90759	117.374	2.4175	113.176	2.3475	21.2389	0.440727	1.8635	0.125646	8.86647	0.211338	389.715	9.29306	21.6922	0.516529	148.044	3.30003	16.7226	0.369172	4.06211	0.102736	1.64396	0.0606461	0.0987117	0.00569486	128.19	2.6557	14.1921	0.409971	36.4701	0.655251	4.93123
BHVO-2G_2	227418	11995.2	1137.02	79.1547	31.3409	0.685078	18471.3	403.275	345.675	10.2056	304.2	9.42534	1419.09	45.214	48.3366	1.08006	125.812	4.14553	126.538	3.79469	121.492	3.29965	23.3449	0.773602	2.09575	0.0823304	9.90877	0.253713	433.129	11.7377	23.2789	0.613759	159.198	4.58067	18.5939	0.570276	4.48103	0.176731	1.74889	0.0729716	0.108628	0.00747001	142.48	4.93694	15.8301	0.48754	40.8583	1.26983	5.43893
BHVO-2G_3	234448	7503.28	1191.61	57.7732	30.5771	0.723867	18455.9	386.736	340.171	8.90596	302.979	5.13582	1390.04	47.008	48.7199	0.781726	125.282	3.96298	125.333	2.66206	120.779	2.82477	22.7197	0.423686	2.04012	0.0882326	9.62529	0.211256	423.639	11.9677	22.6622	0.547746	156.35	4.28051	18.2804	0.478326	4.46378	0.150156	1.74338	0.0654651	0.102833	0.00859929	140.057	3.34507	15.3466	0.404664	39.5368	0.656947	5.37184
BHVO-2G_4	238292	11350.9	1223.26	47.1459	29.8679	0.790984	17727.5	352.891	328.291	9.57604	293.738	7.57186	1333.98	39.6029	46.2567	1.09709	119.016	3.75284	118.767	2.09138	114.87	2.92514	21.3463	0.427522	1.79003	0.0904982	9.06279	0.181732	395.206	11.8341	20.8256	0.573797	145.373	2.47964	16.8781	0.374809	4.19332	0.131896	1.63019	0.0641422	0.0930905	0.00676082	128.989	2.66085	14.2565	0.291079	36.8285	0.848371	5.02363
BHVO-2G_5	236307	13783.9	1201.13	61.4217	29.9157	0.768764	17665.5	371.304	337.247	14.0836	291.186	7.1903	1338.91	45.6358	45.7848	0.856211	119.995	4.39741	117.886	3.57682	115.942	3.37308	21.6951	0.706915	1.86548	0.201755	9.04375	0.269829	395.59	12.1525	21.0449	0.614316	143.704	4.27788	17.1578	0.459161	4.05539	0.187068	1.65278	0.0619614	0.0943655	0.0128478	130.957	3.17079	14.1151	0.39525	32.4691	0.920364	4.97203
BHVO-2G_6	234668	8303.1	1216.44	49.0776	29.9365	0.799213	18176.7	282.543	333.957	10.1851	292.589	7.21298	1358.67	41.2744	46.9462	0.6063	121.215	4.68748	120.5	2.89254	118.819	3.01205	21.9454	0.544546	1.93207	0.0889819	9.1557	0.179434	402.201	11.42	21.2835	0.515492	145.237	3.21278	17.1435	0.430798	4.28975	0.13929	1.68478	0.0651108	0.0970365	0.00663954	130.578	3.47995	14.4507	0.345181	37.3037	0.878789	5.00999
BHVO-2G_7	233437	9356.57	1232.66	73.5593	30.0241	0.700357	18177.1	362.194	337.889	8.88316	294.761	6.08299	1369.38	42.3679	45.8603	0.736729	122.209	2.6256	120.664	2.52134	116.899	1.72467	21.81	0.3851	1.74206	0.128182	9.12778	0.139816	401.206	10.3685	21.066	0.403227	142.9	2.83534	17.2212	0.279474	4.15416	0.115313	1.7174	0.034122	0.0983876	0.00934504	132.736	2.15876	14.379	0.257547	37.8006	0.830982	5.05336
BHVO-2G_8	231849	14069.2	1185.11	38.7879	29.143	0.609255	17485.8	271.392	322.029	8.42963	282.451	6.71276	1332.23	41.5094	44.7191	0.669389	118.131	2.91397	114.801	2.05787	113.664	2.30087	21.0183	0.296517	1.82796	0.0934913	8.90405	0.166506	383.317	7.01987	20.3709	0.391927	139.61	2.38776	16.89	0.326844	4.06087	0.131855	1.63055	0.0689199	0.0905524	0.0072707	127.927	2.74134	13.976	0.361648	36.248	0.643789	4.90059
BHVO-2G_9	240743	9488.01	1266.2	49.8996	30.0068	0.754404	18276.6	433.531	338.943	8.03498	298.55	8.93685	1383.78	32.3949	47.44	1.38899	123.574	3.63359	121.997	3.61099	118.46	2.88427	22.2519	0.653216	1.90972	0.112671	9.44636	0.294224	404.611	10.0747	21.2321	0.617936	145.73	5.04905	17.6426	0.403627	4.21762	0.227847	1.74797	0.0804647	0.101413	0.00689404	133.252	4.0223	14.5128	0.39895	38.3122	1.23303	5.12222
BHVO-2G_10	229617	10432.7	1238.79	85.2247	29.1426	0.801715	18092.6	451.201	331.926	11.2639	295.202	7.3943	1367.83	54.1925	47.7434	1.29168	121.884	4.86761	120.877	2.84941	117.668	3.38146	22.14	0.637387	1.88306	0.110053	9.27596	0.264208	395.562	11.6094	20.5532	0.41478	141.991	4.03598	17.2751	0.4615	4.12689	0.173225	1.68355	0.10311	0.100517	0.0072021	131.387	4.0246	14.2006	0.378186	37.1527	0.74288	5.02905
NL22-01
NL22-01_1	344344	33463.9	142.62	35.5134	6.11435	0.545664	1517.04	90.5012	15.5094	2.56359	17.7347	2.53183	242.654	18.0298	3.92091	1.44909	4.25957	3.52132	12.2135	2.6157	79.0729	30.3172	107.511	37.575	1.44053	0.749769	7.79511	2.20739	95.9748	6.59645	44.3285	3.46704	186.837	17.32	5.13353	0.737643	1.10099	0.354739	2.4628	0.4129	0.713941	0.257732	47.6028	4.85343	10.7067	1.06679	26413.5	15288.7	4.47283
NL22-01_2	294750	13576.5	163.448	37.9353	4.89286	0.358156	1442.98	163.349	12.9897	1.20943	15.7513	3.67885	212.113	13.2726	3.02553	0.698368	5.77184	2.26013	9.16198	1.00167	84.318	36.2104	129.745	66.1951	0.912355	0.5259	7.21086	1.9769	91.5744	6.28704	41.1668	4.48509	170.425	17.7507	4.33736	0.460647	0.49086	0.248529	2.05739	0.410077	0.530337	0.206644	43.7793	4.70736	10.103	1.04276	19602.7	8867.41	4.04884
NL22-01_3	361575	59065.5	161.701	30.5836	5.30149	0.667839	1334.22	183.673	12.6159	2.49045	14.0415	2.25216	206.954	26.4219	3.44482	0.989037	12.438	4.75559	9.22043	1.42318	72.3468	21.8458	77.3363	27.9926	1.40313	0.630043	5.1528	1.05319	89.4444	13.3864	39.4028	5.31237	163.111	23.2888	4.56979	0.692521	0.669929	0.251046	1.91074	0.356076	0.852388	0.309992	43.387	6.42914	9.52954	1.49902	25422.7	15189.3	4.3227
[truncated: 33 more columns]

## Sheet: Details_15Jan2025
Laboratory and sample preparation details
Laboratory name	Tectonics, Metamorphic Petrology & Orogeny (TeMPO) Laboratory, Johns Hopkins University
Sample type/mineral	Whole-rock glass
Sample preparation	Powdering of 40–100 g of fresh rock in tungsten carbide ring-and-puck-mill; flux melting of 0.4 g of resulting rock powder with 3.6 g of lithium tetraborate; glass disks broken and shards mounted in 1 inch epoxy round then ground to maximum exposure then polished to 0.3 µm SiC paste finish
Laser ablation system details
Make, Model and type	Teledyne (Photon Machines) Analyte G2
Ablation cell and volume	HelEx II active two-volume ablation cell
Laser wavelength (nm)	193 nm ArF Excimer
Pulse width	4 ns
Fluence	4.0 J cm-2
Repetition rate	10 Hz
Ablation duration	60 s
Analytical 'spot' shape and size	Square; 50 µm x 50 µm
Sampling mode / pattern	Constant speed line raster
Raster velocity	10 µm s-1
Cell carrier gas flows	0.3 L min-1 He flow into ablation cup; 0.5 L min-1 He flow into ablation cell
Inductively-coupled-plasma mass spectromer (ICP-MS) system details
Make, model, type, analytical mode	Agilent Technologies 8900 triple quadrupole ICP-MS, operating in single quad mode
Sample introduction	1 cm inner diameter PFA tubing, 2.5 mm quartz injector; 5 cm sampling depth; Ni cones, high-sensitivity skimmer insert
RF power	1550 W
Make-up gas flow and position	0.90 L min-1 Ar, between cell and torch
Detection system	Single ion-counting SEM
Masses measured (and dwell times)	29 (10 ms); 31,43,51,52,55,59,60,88 (50 ms); 45,47,49,63,66,71,72,85,89,90,93,95,118,133,137,139, 140,141,146,147,153,157,159,163,165,166,169,172,175,178,181,208,232,238 (100 ms)
Total integration time	3.862 s
‘Sensitivity’ as useful yield	0.003%–0.005% U [100 x (#ions detected / #atoms sampled); Schaltegger et al. (2015)]
IC Dead time	41.6 ns
Data processing details
Gas blank	15 s on-peak zero subtracted
Calibration and standardsl strategy	NIST612 as primary reference material for geochemistry, BCR-2G, BHVO-2G and NIST610 to assess accuracy
Common-Pb correction	No common-Pb correction applied
Data processing packages	Iolite v4.6.1 (Paton et al., 2011), using the Trace Elements Next data reduction scheme and a mean–median fit to the standard data
Uncertainty level and propagation	Elemental abundances in "Data_" sheets are ppm with 2σ internal uncertainty calculated from counting statistics of the ICP-MS. Uncertainty for each element–non-primary reference material combination calculated from % difference between measured and accepted value (accuracy) added in quadrature to the 2σ internal uncertainty. Session uncertainty calculated by 2sd value of above-calculated uncertai…
Discordance criteria	Discordance reported as the relative difference between the measured 207Pb/235U and 206Pb/238U dates; calculated as |1–(206Pb/238U date)/(207Pb/235U date)| and reported as %
Interpreted age transition	The transition from preferred interpretation of 207Pb/206Pb (for older) to 206Pb/238U (for younger) dates set at 850 Ma
Quality control and validation (materials)	BCR-2G (Jochum et al., 2005)
	BHVO-2G (Jochum et al., 2005)
	NIST610
Quality control and validation (results)	BCR-2G: 13.5% (excluding Si, P, Ti, Mn, Cu, Ga, Ge, Mo, Sn)
	BHVO-2G: 12.1% (excluding Si, P, Ti, Mn, Cu, Ga, Ge, Mo, Sn)
	NIST610: 5.4% (excluding Si, P, Ti, Mn, Cu, Ga, Ge, Mo, Sn)
	All non-primary reference materials: 11.7% (excluding Si, P, Ti, Mn, Cu, Ga, Ge, Mo, Sn)
References
Jochum, K.P., Willbold, M., Raczek, I., Stoll, B. & Herwig, K., 2005. Chemical characterisation of the USGS reference glasses GSA-1G, GSC-1G, GSD-1G, GSE-1G, BCR-2G, BHVO-2G and BIR-1G using EPMA, ID-TIMS and LA-ICP-MS. Geostandards & Geoanalytical Research 3, 285–302.
Paton, C., Hellstrom, J., Paul, B., Woodhead, J. & Hergt, J., 2011. Iolite: freeware for the visualization and processing of mass spectrometric data. Journal of Analytical Atomic Spectroscopy 26, 2508–2518.
Schaltegger, U., Schmitt, A.K. & Horstwood, M.S.A., 2015. U–Th–Pb zircon geochronology by ID-TIMS, SIMS, and laser ablation ICP-MS: recipes, interpretations, and opportunities. Chemical Geology 402, 89–100.

## Sheet: Data_15Jan2025
	Si29_ppm_mean	Si29_ppm_2SE(int)	P31_ppm_mean	P31_ppm_2SE(int)	Sc45_ppm_mean	Sc45_ppm_2SE(int)	Ti47_ppm_mean	Ti47_ppm_2SE(int)	V51_ppm_mean	V51_ppm_2SE(int)	Cr52_ppm_mean	Cr52_ppm_2SE(int)	Mn55_ppm_mean	Mn55_ppm_2SE(int)	Co59_ppm_mean	Co59_ppm_2SE(int)	Ni60_ppm_mean	Ni60_ppm_2SE(int)	Cu63_ppm_mean	Cu63_ppm_2SE(int)	Zn66_ppm_mean	Zn66_ppm_2SE(int)	Ga71_ppm_mean	Ga71_ppm_2SE(int)	Ge72_ppm_mean	Ge72_ppm_2SE(int)	Rb85_ppm_mean	Rb85_ppm_2SE(int)	Sr88_ppm_mean	Sr88_ppm_2SE(int)	Y89_ppm_mean	Y89_ppm_2SE(int)	Zr90_ppm_mean	Zr90_ppm_2SE(int)	Nb93_ppm_mean	Nb93_ppm_2SE(int)	Mo95_ppm_mean	Mo95_ppm_2SE(int)	Sn118_ppm_mean	Sn118_ppm_2SE(int)	Cs133_ppm_mean	Cs133_ppm_2SE(int)	Ba137_ppm_mean	Ba137_ppm_2SE(int)	La139_ppm_mean	La139_ppm_2SE(int)	Ce140_ppm_mean	Ce140_ppm_2SE(int)	Pr141_ppm_mean
NIST612
NIST612_1	349919	15870.2	46.5123	2.6171	39.114	0.809024	44.1938	0.916762	37.4791	1.08242	36.799	1.09015	38.1613	0.832921	36.3569	0.905596	38.8258	0.84223	39.4565	0.88193	38.6716	0.689399	36.2903	0.886068	36.1371	0.539281	30.8031	0.507797	77.0937	1.66181	37.2731	0.932446	37.2684	0.800674	38.5328	0.803133	37.177	0.839009	37.9238	1.04657	42.4223	0.780366	38.2103	0.90078	35.6339	0.880988	37.9796	0.799493	37.0138
NIST612_2	348578	22081.9	46.4737	4.06434	40.197	1.09369	44.5982	0.997541	39.3373	1.4466	36.9899	1.24019	38.7434	1.16687	35.5743	0.9512	40.6595	1.66661	39.5743	1.1103	39.3015	1.02437	37.6259	1.04261	37.0667	0.853505	31.5239	0.965509	78.8553	2.36012	38.6648	0.909909	38.4564	1.18859	38.7737	1.00858	38.3183	1.01256	39.4581	1.20585	43.1577	1.22304	40.5436	1.17386	36.2197	1.14711	39.1319	1.28217	38.4791
NIST612_3	340427	15870.6	53.9471	2.5979	40.3628	1.06857	43.9676	1.48759	39.4399	1.3456	37.1368	1.26066	38.7174	1.33258	35.7147	0.900928	40.5774	1.23614	38.9046	1.157	39.3176	1.16156	37.4284	1.0831	37.1371	1.19606	31.8849	0.817807	78.2213	2.76525	38.7203	1.28488	38.2348	1.01495	39.4748	1.37965	37.9821	0.905364	39.2494	1.14735	43.7536	1.19088	39.5437	1.36451	36.2622	1.07373	39.2534	0.899453	38.5609
NIST612_4	364990	23906.9	51.1852	2.63416	40.5068	0.95624	45.0017	1.03944	40.235	1.07266	36.6694	1.29109	39.1443	1.28504	35.9035	0.829786	39.4604	1.35667	39.3416	0.880759	39.5698	1.37448	37.3409	0.82757	36.5994	1.001	31.5417	0.944308	79.3544	1.84361	38.4097	0.971655	38.2221	1.55444	40.0631	0.996728	38.1306	0.825728	39.3004	1.03275	43.9399	1.29622	40.243	0.99596	37.1722	0.825579	39.0107	1.21539	38.5651
NIST612_5	348680	20535.9	47.9199	2.72681	41.033	1.28222	43.9849	1.31052	39.8535	1.21472	36.9871	1.33961	38.772	1.38257	36.3789	0.81064	40.0403	1.27966	39.4165	0.874479	39.8197	1.14211	38.0184	1.00201	36.8684	0.871184	32.3555	0.944569	79.4097	2.14818	39.0228	1.23764	39.1624	1.07152	39.9002	1.01221	38.4347	1.21997	39.4452	1.13528	43.7093	1.1305	40.8379	1.21145	36.6858	1.02683	39.2319	1.21824	38.6896
NIST612_6	339195	21750.2	47.6621	3.15445	40.1852	1.32767	44.1834	1.56102	38.6214	2.09391	36.6145	1.48605	38.6474	1.79041	35.0076	1.17049	39.3948	2.08939	37.951	1.98021	39.4882	1.54699	36.7058	1.3947	36.299	1.21128	31.5387	1.47259	78.4763	2.50711	38.5197	1.60068	38.3245	1.60698	38.9513	1.3853	37.6993	1.76652	39.2171	1.59673	43.323	2.10352	39.4813	1.84643	36.5849	1.34295	38.8253	1.68196	38.143
NIST612_7	337893	17580	44.7779	3.75817	40.5901	1.34927	45.4046	1.39328	39.6544	1.31963	37.6113	1.16681	39.103	1.65997	35.8712	1.10368	39.6029	1.36276	39.2387	1.04837	39.368	1.00076	37.4644	1.03394	36.7847	0.812982	32.0877	0.883871	79.873	2.46341	38.4148	0.895477	38.5235	1.16459	39.6125	1.18173	38.1222	0.903843	39.863	0.921248	43.1951	0.994129	40.3674	1.05474	36.7834	0.647055	38.6108	1.11433	38.5355
NIST612_8	345307	20002.3	47.658	2.90815	39.5616	1.04717	43.6086	1.00979	38.4513	1.12629	35.9117	1.07204	37.3223	1.19942	35.7787	0.803019	37.6258	1.64172	37.3153	0.775827	38.6835	0.820534	36.272	0.722648	36.1726	0.59289	31.4595	0.593165	77.2534	2.37668	38.2838	0.817287	37.4051	0.874404	38.4538	0.598374	37.1211	1.04743	38.4651	0.670035	42.3089	1.13697	39.1267	0.880814	35.6363	0.729398	38.1656	0.763776	37.1717
NIST612_9	333000	18038.9	50.6911	3.73324	40.2698	1.16097	44.6983	1.358	39.1822	1.55703	36.7683	1.11466	38.9759	1.31625	35.9947	1.10982	38.8922	1.17881	38.5188	1.04563	39.6984	1.04645	37.5374	1.07641	37.0936	1.00026	31.7456	0.872023	80.2429	2.38139	38.7301	0.915854	38.2138	1.08028	39.9936	1.31591	38.2033	1.19386	38.937	1.26129	43.4403	1.23333	40.2038	1.23117	36.3475	1.10024	38.6074	1.34021	38.0986
NIST612_10	338885	17252.5	47.2599	2.6559	39.2059	1.35778	43.5894	0.842926	38.5204	1.61832	35.4602	1.05222	38.2359	1.27543	35.2226	1.15756	37.7898	1.728	36.825	1.11612	39.1509	0.985573	35.9571	0.544296	35.9628	1.01778	31.0944	0.796881	77.4776	2.07882	38.0398	1.09866	37.393	1.01906	38.1194	0.93188	37.0687	0.818493	38.1459	1.05161	42.11	1.23455	39.0191	1.2095	35.3863	1.02323	37.993	0.9636	37.2171
NIST612_11	339235	8934.04	44.4987	2.26078	40.0514	0.973008	45.3232	0.855889	39.2424	1.11223	36.941	1.0274	39.4579	0.88875	35.1424	0.795068	38.264	1.27367	37.6068	0.61133	39.6607	0.847879	37.4415	0.663391	36.8313	0.737187	31.7042	0.645195	79.9413	2.3848	38.6634	0.83674	37.8479	0.917637	39.1992	0.917932	37.5063	1.01624	39.3598	0.824584	43.1278	1.0134	39.4774	0.839405	36.502	0.595318	38.3763	0.801333	37.7953
NIST612_12	314861	16327.2	45.6165	2.90055	38.9976	1.48502	43.4692	1.63214	38.7678	1.72559	35.5545	1.20405	37.9935	1.84767	34.0807	1.08645	38.2339	1.84031	36.055	1.23752	38.1105	1.35379	35.7832	1.27727	34.9722	1.00898	31.125	0.969645	76.842	2.42815	37.6611	1.10268	37.1326	1.22821	38.1411	1.16471	36.6217	1.17765	37.5226	1.1529	41.7917	1.31183	39.0074	1.12892	34.8392	1.23386	38.0426	1.00286	37.1043
NIST612_13	333903	21841.9	43.3629	3.13944	40.6985	1.35278	44.339	1.74022	38.8276	2.54274	36.9547	1.53718	39.2623	1.65985	35.6983	1.05106	39.2668	1.87261	36.8711	1.42035	39.7594	1.49525	37.4947	1.60369	36.4075	1.28409	32.0941	1.01771	80.6815	2.57531	38.7492	1.41396	38.5855	1.46837	39.3621	1.39759	37.8959	1.22932	38.7454	1.60384	43.791	1.46706	40.0197	1.79928	36.4647	1.29946	39.471	1.52986	38.3212
NIST612_14	317395	17373.8	41.9772	2.64873	39.7693	1.46934	42.9727	1.29125	37.5031	1.87576	35.7602	0.722832	38.1926	1.72274	34.4949	0.998225	37.1384	1.93593	35.6798	1.00099	38.0979	1.24769	36.1552	1.10331	34.9826	1.2996	30.9624	0.943726	79.0824	2.65909	37.587	1.36585	37.4459	1.40653	38.3873	1.09669	36.2637	1.28204	37.5756	1.00212	42.2309	1.50216	38.4409	1.18375	35.4307	1.19952	37.8864	1.42161	37.1121
NIST612_15	315096	26125.7	42.6758	2.96485	39.4337	1.58466	44.2652	1.18766	38.31	1.69124	36.4573	1.28244	38.5326	1.60922	34.7326	0.983036	36.9222	2.11538	36.5544	1.02261	39.3295	1.59507	36.601	1.0701	35.994	1.01296	31.2071	0.97524	78.277	2.8014	37.7286	0.915285	37.453	1.46922	38.4569	1.11262	36.5361	1.58565	38.6732	1.08992	42.0218	1.37517	38.8921	1.12512	35.6364	0.746009	38.1633	1.20304	37.8039
BCR-2G
BCR-2G_1	277320	13804.4	1896.18	114.673	32.1408	0.973718	14974.8	463.054	440.427	22.649	16.1165	0.637648	1552.11	79.325	39.4535	1.12107	12.4392	0.828237	17.172	0.59921	153.208	4.15081	22.5313	0.642223	1.86436	0.131153	47.4607	1.66373	334.322	9.52484	29.7735	0.733945	161.609	5.51437	11.7756	0.376847	264.951	8.84612	2.11223	0.0980559	1.15942	0.0441028	673.776	19.1081	23.7149	0.673982	52.8784	1.68384	6.46581
BCR-2G_2	288896	25238.4	1889.89	112.239	31.646	1.08833	15529	552.502	461.09	21.7463	16.7639	0.915567	1596.66	62.1778	41.2126	1.4381	12.7615	0.617808	18.3042	0.731691	160.797	5.46584	23.4954	0.742844	2.00321	0.105818	48.6072	1.60421	343.98	12.172	29.9578	1.00536	163.416	6.01253	11.8998	0.402538	274.322	5.94594	2.16197	0.109629	1.21929	0.0459083	686.973	22.0223	24.0633	0.76169	53.6194	1.64065	6.52952
BCR-2G_3	280716	16951.1	1848	126.357	32.3504	1.18798	15493.2	500.159	465.567	23.7689	16.9829	0.687225	1572.41	71.8447	39.9683	1.8732	12.7725	0.48649	17.7654	0.533797	160.586	6.27228	23.1077	0.811585	2.00001	0.131588	49.1485	1.45854	342.501	11.6361	30.7436	1.17779	163.348	5.47892	11.9061	0.483818	276.53	8.60204	2.18174	0.108664	1.22401	0.053577	699.484	24.4607	23.7737	0.722438	53.4117	1.67241	6.54123
BCR-2G_4	271439	15779.5	1865.74	131.497	31.9604	0.960083	15398.9	416.89	454.175	17.0218	16.5466	0.499954	1570.79	77.0058	39.4646	1.08528	12.3137	0.455491	17.566	0.555124	156.814	5.70425	23.468	0.673675	1.81053	0.0980026	48.8058	1.53357	337.96	9.63593	30.2842	0.721646	161.165	4.18959	11.9628	0.388228	267.416	5.81097	2.23217	0.112203	1.2139	0.0381837	680.298	20.0127	24.1294	0.578577	52.5391	1.50324	6.54326
BCR-2G_5	275665	14885	1851.87	84.5543	31.7325	0.519848	15098.8	309.832	444.823	13.2439	16.3582	0.575301	1591.47	54.6002	39.5247	1.30889	12.1921	0.381452	17.3581	0.154921	157.861	4.90693	22.4052	0.455299	1.98488	0.0751933	48.5936	1.03753	334.822	8.81914	30.011	0.636047	161.887	1.81974	11.8277	0.247444	268.245	5.76921	2.17051	0.0670214	1.1725	0.0332159	675.796	13.3331	23.3898	0.510004	52.8721	1.11466	6.32827
BCR-2G_6	266075	10010.1	1867.98	123.367	32.0696	1.12451	15418	402.876	457.675	20.6273	16.3866	0.476566	1619.37	62.9605	39.4914	0.918003	12.2248	0.418242	17.3794	0.539986	155.434	5.76546	22.7571	0.488891	2.07158	0.151706	48.8848	1.58601	338.871	9.89996	30.4529	0.816938	165.782	5.37332	11.9444	0.361059	269.137	9.056	2.20816	0.103597	1.18569	0.0427212	682.829	18.4413	24.031	0.656036	52.7943	1.71832	6.48808
BCR-2G_7	279249	14124.1	1750.73	64.1146	31.6986	1.01222	15395.6	476.501	456.792	18.2082	16.0595	0.522171	1573.41	62.5418	38.4145	1.28596	12.1742	0.535508	17.2875	0.544317	152.276	3.83332	22.7035	0.620581	1.91221	0.110495	48.7057	1.22266	340.012	11.7524	30.2798	0.937657	164.98	4.56911	11.6595	0.325411	265.273	7.98531	2.13893	0.0656231	1.18031	0.0418283	677.055	17.9111	23.5807	0.648221	52.2809	1.4455	6.36845
BCR-2G_8	259168	15131.2	1789.1	75.6247	31.5934	0.859503	15367.8	294.282	455.755	16.4088	15.9588	0.53047	1574.66	42.9163	38.3173	1.44849	12.0759	0.617162	17.1238	0.507866	151.367	4.01144	22.4199	0.675129	1.95886	0.0872075	47.8747	0.998632	337.597	9.04667	30.2712	0.736255	162.923	4.05026	11.5809	0.253858	264.814	5.18192	2.08098	0.0718386	1.16607	0.0384656	672.32	13.5143	23.4698	0.444656	52.6433	1.27962	6.32393
BCR-2G_9	260176	15910.2	1712.57	71.6423	31.408	0.971631	15103	364.964	447.076	18.1347	15.7085	0.644969	1551.82	58.1791	38.3582	1.0498	11.8517	0.48667	16.7358	0.41906	152.576	4.49621	22.3889	0.632541	1.88737	0.119864	47.3773	1.12298	334.813	10.4116	29.8273	0.874944	162.211	4.26358	11.4046	0.273465	261.444	6.94578	2.15236	0.0758452	1.17693	0.0325449	666.071	18.3055	23.4171	0.724847	51.5454	1.56126	6.35877
BCR-2G_10	263999	16100.4	1821.48	90.7585	31.8978	0.98159	15349.2	475.369	443.615	23.3049	15.5518	0.497905	1602.03	70.7274	38.1857	1.18092	11.9775	0.587334	17.0603	0.563225	153.034	3.71698	22.4259	0.878694	2.06758	0.134526	48.2643	1.11883	346.778	9.39438	30.926	0.516459	164.549	6.93194	11.9737	0.290951	261.398	6.62667	2.14283	0.0717658	1.17796	0.0386412	676.963	21.2598	24.3383	0.676702	51.7895	1.17034	6.58683
BCR-2G_11	252256	17021.3	1708.17	105.7	31.6449	1.09012	15073.5	534.572	439.544	34.1051	15.4942	0.324565	1558.51	79.3278	37.7279	0.806507	11.5086	0.714406	16.4513	0.701053	147.973	3.40429	22.42	1.02575	2.12204	0.0955706	46.2894	1.99937	341.635	13.2646	30.2308	1.19172	164.442	7.16032	11.4733	0.281733	257.261	9.70313	2.07795	0.0807161	1.13987	0.0412576	676.258	25.5157	23.4355	0.80818	51.1761	1.79729	6.42439
BCR-2G_12	257230	26553.9	1764.01	113.66	32.962	1.1342	15584.9	620.028	455.034	29.2962	16.0822	0.570367	1581.35	93.1462	37.9801	1.46827	11.8821	0.656031	16.8348	0.648212	153.565	6.06634	22.3335	0.650031	2.15074	0.091509	48.4387	1.87094	345.012	16.3342	31.1799	1.09315	168.076	6.56882	11.8706	0.384341	265.214	9.2694	2.14591	0.101364	1.18578	0.0383831	686.733	25.7249	24.2598	0.930425	52.699	1.66312	6.51677
BCR-2G_13	257979	21519.2	1727.34	125.982	31.9869	1.49362	15389.3	717.294	443.08	32.9486	15.0736	0.438129	1581.56	121.127	37.7425	1.27079	11.4801	0.835461	16.3328	0.772805	152.657	6.13901	21.978	0.966841	1.90759	0.144802	47.3779	1.81512	341.973	13.9127	30.7827	1.32427	164.003	5.89265	11.6833	0.519908	260.786	10.2498	2.08574	0.0784881	1.16625	0.0604645	675.699	27.0222	23.9544	0.834143	52.5108	2.1338	6.49493
BCR-2G_14	255616	17748.6	1733.64	122.579	31.9768	1.41351	15613.3	704.532	448.44	27.7359	15.6277	0.661137	1576.36	119.152	38.202	1.57345	11.707	0.980425	16.6063	0.740525	152.004	6.28092	22.4692	0.868285	2.00397	0.139325	47.2373	1.98209	342.488	13.026	31.0813	1.46611	164.392	6.86311	11.6872	0.575437	262.066	11.7343	2.06231	0.114016	1.15437	0.0484692	676.942	32.0374	24.126	1.03848	52.6731	1.98741	6.36481
BCR-2G_15	255403	16021.8	1729.59	144.399	32.1094	1.29623	15162.6	581.557	440.965	29.6314	15.1557	0.5854	1562.38	110.691	37.3086	1.2346	11.5892	0.698184	16.3102	0.69867	155.843	7.1651	22.4596	0.938177	1.99969	0.173221	47.8143	1.85601	335.922	10.3581	30.6843	1.11892	163.976	6.67991	11.3802	0.445191	260.059	10.9964	2.16188	0.120356	1.19895	0.0603527	670.149	29.9325	23.7665	0.925545	52.5138	1.9964	6.41811
BHVO-2G
BHVO-2G_1	242938	11237.3	1385.26	81.9377	32.0636	1.17327	18262.8	436.177	331.619	17.5662	291.985	7.94635	1295.12	52.3733	45.289	1.06928	122.297	6.48555	124.034	3.72112	113.392	3.76487	21.6918	0.724541	1.13086	0.0906279	9.45619	0.329899	385.565	11.4236	22.9134	0.754042	155.536	5.07504	17.0852	0.49031	4.27409	0.188856	1.66644	0.0570002	0.0969241	0.00747352	128.572	4.10237	14.7098	0.429596	36.7646	1.16223	5.00718
BHVO-2G_2	229673	9966.97	1285.66	79.6944	31.4393	1.43244	18050.8	559.841	324.779	14.6789	283.221	9.18151	1333.85	55.1558	44.4647	1.52123	119.602	5.45321	122.759	3.97508	111.139	3.86745	21.3951	0.788012	1.20031	0.177598	9.33339	0.31627	385.992	13.6129	22.685	0.789446	154.193	5.79644	16.9608	0.726833	4.06821	0.183359	1.63882	0.0815665	0.0983616	0.00734485	129.731	4.70258	14.6009	0.554436	36.5307	1.19885	5.09285
BHVO-2G_3	243938	12197.7	1363.43	66.0461	31.4495	0.928032	18412	437.454	340.452	14.7337	289.144	9.58872	1332.53	61.5919	46.0892	1.48101	122.311	5.51651	126.058	2.89134	116.05	3.05092	22.1383	0.703816	1.18906	0.147918	9.57179	0.282869	397.405	9.10122	22.3111	0.484936	156.325	4.24388	17.2148	0.482234	4.2062	0.119943	1.66382	0.0600513	0.104402	0.00797645	130.84	4.03524	14.704	0.345775	37.5725	1.08143	5.21469
BHVO-2G_4	241238	14221.6	1389.7	79.9253	31.2735	1.34201	18299.5	541.074	335.99	18.1053	282.587	8.11636	1322.79	70.1899	45.2158	0.778439	122.333	6.12873	124.234	4.42516	114.646	4.70612	21.9076	0.854484	1.16257	0.0897983	9.45893	0.30606	393.059	15.0137	22.5235	0.695213	153.976	5.57159	17.2535	0.590164	4.2256	0.110621	1.67658	0.0744183	0.0937643	0.00911202	131.077	3.97267	14.7284	0.502053	37.6514	1.10937	5.13469
BHVO-2G_5	249551	16838.7	1391.24	64.8891	31.1364	0.923785	18763.8	517.252	341.096	15.4725	294.253	8.2038	1356.33	43.5394	46.231	1.25063	121.101	6.10366	125.354	3.45486	115.739	2.97043	22.3038	0.652953	1.10965	0.167415	9.32556	0.256517	402.415	12.0792	23.1316	0.714239	154.087	4.76093	17.5756	0.482427	4.22705	0.183993	1.68816	0.0704313	0.0986927	0.00930595	132.373	4.00741	14.8835	0.343173	37.0237	1.10188	5.23834
BHVO-2G_6	236030	15860.2	1361.82	59.7076	31.0651	0.936146	18664.4	599.915	335.069	12.8299	293.244	10.4679	1348.34	45.6401	45.7185	1.04456	116.903	3.97904	123.308	3.23997	111.74	3.79003	21.6678	0.774513	1.10731	0.136967	9.32529	0.248842	401.581	13.0722	23.0561	0.623614	153.692	3.89458	17.3979	0.408891	4.15595	0.135554	1.69815	0.0719192	0.100734	0.00821385	130.757	4.32775	14.677	0.469473	36.6275	0.729893	5.10919
BHVO-2G_7	234316	12927.2	1319.63	88.099	31.623	0.97691	18634.8	498.055	338.055	14.0192	288.449	9.49293	1298.95	44.3509	44.4251	0.946907	116.169	5.45188	112.955	3.16969	108.756	2.1479	21.4917	0.664254	1.08779	0.154014	9.49653	0.245539	399.435	15.3321	23.1181	0.570132	157.746	4.13173	17.1642	0.578455	4.22656	0.138719	1.63213	0.0766856	0.0940258	0.00603252	130.06	3.40193	14.5692	0.284563	36.8571	1.14095	5.13473
BHVO-2G_8	244316	14528.2	1346.29	63.7704	31.8008	0.950045	18735.6	426.49	341.497	11.0916	289.959	10.3354	1342.18	45.1636	44.0213	0.718709	117.89	5.56964	115.579	2.85383	110.572	2.68295	21.6899	0.581571	1.25126	0.19527	9.49528	0.25772	402.383	13.1673	23.2665	0.649691	157.513	4.32	17.2734	0.424101	4.25495	0.122556	1.653	0.04898	0.0976629	0.00951717	131.3	3.97019	14.871	0.376731	37.2274	1.20093	5.15912
BHVO-2G_9	233748	15516.6	1383.77	91.9449	31.7562	0.894574	19013.9	591.792	342.014	15.8739	300.265	11.2503	1389.96	53.7721	46.3214	1.57081	120.961	5.48666	119.789	3.32672	117.874	3.43789	22.4856	0.753591	1.38828	0.151413	9.72709	0.351144	408.008	10.7416	23.2598	0.670307	155.612	4.04388	17.5539	0.636513	4.22046	0.122999	1.68763	0.0924804	0.109874	0.00907044	134.646	4.43103	15.1056	0.492585	38.0064	1.26446	5.23056
BHVO-2G_10	225573	14338.2	1315.27	81.2652	30.8317	1.17635	18378.3	546.764	335.603	17.7851	282.247	10.2732	1342.76	60.5927	44.8285	1.41242	118.708	5.70859	114.974	4.35841	62.533	2.50268	21.4896	0.818417	-7.04095	0.256338	9.28047	0.267356	398.589	14.9308	22.5382	0.766467	153.195	4.52367	17.232	0.537253	4.18145	0.140725	1.65108	0.074276	0.100991	0.00872187	129.614	3.92522	14.5001	0.538949	36.8895	1.13319	5.06439
BHVO-2G_11	231826	10729.3	1367.72	86.4248	31.1472	1.26914	18650.9	620.887	340.621	21.6179	286.217	8.17885	1373.8	82.0889	44.7333	1.35406	117.573	7.93388	119.471	4.43493	112.182	4.52495	22.0449	0.830552	1.33029	0.1437	9.39723	0.323756	404.894	14.4132	22.69	0.791407	153.787	5.97743	16.9591	0.630549	4.19513	0.175578	1.70409	0.0737758	0.110684	0.00679746	133.556	6.98	14.6372	0.439175	37.5147	1.46667	5.16114
BHVO-2G_12	238623	13492.6	1316.73	61.0404	31.2751	0.800168	18785	448.983	343.183	13.198	290.219	6.71897	1359.26	40.7789	45.5539	1.1495	119.757	2.95274	120.958	3.20942	116.074	2.40503	21.89	0.676897	1.65916	0.139817	9.43421	0.230608	401.833	13.1174	22.8601	0.551669	155.123	4.96825	17.309	0.383191	4.21096	0.175561	1.651	0.0694276	0.102711	0.00591699	132.142	3.37525	14.593	0.327574	37.2087	1.04448	5.06309
BHVO-2G_13	235897	9852.18	1330.14	44.0601	31.6904	0.799459	18664.7	264.563	346.08	7.30595	287.703	5.98689	1342.12	20.9588	45.0301	1.13841	118.116	3.04493	121.126	2.47224	116.06	2.00232	22.0474	0.355176	1.34103	0.138669	9.34301	0.172439	400.749	9.18727	23.2221	0.440571	155	3.27719	17.3292	0.357412	4.33431	0.143792	1.61444	0.0407425	0.103513	0.0062973	132.562	2.28782	14.5724	0.244847	37.4041	0.688818	5.07385
BHVO-2G_14	228579	7205.33	1304.69	46.4507	31.666	0.537625	18408.3	351.684	336.602	10.4227	285.477	6.80348	1332.67	37.9387	44.3657	0.677868	117.265	3.50132	118.965	2.34909	113.448	2.22572	21.6107	0.49881	1.42609	0.139868	9.31355	0.195294	404.276	10.4273	22.7073	0.39672	157.804	3.1085	17.0565	0.312852	4.32696	0.215264	1.6307	0.0523321	0.095214	0.00628815	129.998	2.53977	14.4702	0.266592	36.8363	0.850616	4.97044
BHVO-2G_15	225983	7489.82	1280.75	43.6609	31.813	0.735759	18519.4	247.389	329.095	7.62473	280.658	6.87969	1334.15	29.9756	43.3482	0.861689	115.522	3.10591	117.104	2.31943	112.865	2.05944	21.1422	0.410659	1.61458	0.156005	9.30371	0.174465	390.913	9.13307	23.2499	0.297497	155.256	2.6169	17.0188	0.316689	4.19612	0.142033	1.62097	0.0691589	0.0984656	0.00758142	129.272	2.27342	14.8103	0.240454	36.3452	0.463615	5.04661
NIST610
NIST610_1	338763	24448.1	514.558	29.2539	483.919	16.6797	516.022	15.025	470.208	21.8987	427.507	6.04487	461.989	21.351	430.473	12.46	476.895	21.6766	458.103	11.8396	466.316	15.7078	441.471	13.2094	404.869	11.0066	420.472	12.7406	519.261	18.3488	442.967	14.6891	440.862	13.1961	476.622	17.3525	423.507	16.1401	450.183	14.3521	366.42	12.8772	455.276	16.1648	439.928	12.8776	463.009	18.0527	448.659
NIST610_2	326184	23958.2	490.907	24.2493	477.212	16.6217	503	13.6239	458.951	20.1521	416.399	12.6203	458.21	18.4307	426.562	10.0537	469.631	18.2795	439.722	12.9955	463.229	14.0836	437.601	12.6056	400.742	12.7141	417.664	12.8861	510.15	19.4169	443.114	12.0096	437.554	13.7711	466.595	15.0819	422.71	12.3159	441.57	13.2571	370.202	10.984	446.508	13.6213	434.211	13.0653	455.694	15.5242	444.259
NIST610_3	338422	23591.6	492.526	28.0574	484.33	12.4777	512.695	13.0752	458.905	14.3915	431.685	14.0462	447.267	13.5167	439.39	11.4354	464.104	16.8078	447.909	15.1034	458.29	12.9679	444.72	14.9384	402.604	12.5126	415.636	9.45796	517.029	20.571	449.14	12.7493	437.959	15.8633	466.057	14.434	421.723	12.0182	444.442	15.0758	373.912	11.2311	452.96	14.6534	433.093	11.2307	463.852	14.3113	445.661
NIST610_4	333560	12988.8	488.076	24.4848	477.04	13.7146	502.632	11.5208	462.721	17.7459	414.554	15.1196	453.655	15.9453	424.629	12.246	463.78	10.6352	442.219	15.4962	455.827	11.6277	442.75	12.4979	400.949	13.1421	419.348	11.8582	529.143	19.0858	451.491	14.2861	437.443	9.55172	471.998	15.9129	424.203	10.1809	452.667	15.3093	367.816	9.82557	454.944	13.1439	435.939	15.3848	453.003	11.9066	449.278
NIST610_5	327316	24442.4	463.812	27.7606	473.112	17.05	506.008	13.0797	461.173	15.7832	414.482	13.2132	456.832	13.3639	427.991	11.0014	460.615	21.4266	437.351	14.5402	456.547	11.0032	443.114	12.9292	405.271	12.3476	416.854	12.1339	512.955	16.6599	444.422	11.771	439.542	12.3339	464.542	15.75	423.9	11.3424	438.261	15.738	373.158	9.92191	451.119	14.1681	439.743	13.7686	454.934	13.424	450.182
NIST610_6	349183	19368.2	502.497	11.4919	489.082	10.9433	520.522	11.7603	482.202	11.679	434.613	14.1428	466.255	13.7538	433.507	8.98825	471.726	16.5657	455.641	12.3255	465.958	11.3721	458.105	9.77174	410.128	9.30322	438.64	13.0368	535.579	13.0713	462.28	9.9801	449.819	12.3519	482.07	7.67748	432.11	11.5458	457.614	9.65196	376.27	8.89854	465.931	9.2904	442.854	9.31623	465.378	14.1722	460.988
NIST610_7	310050	15495.8	484.323	26.2759	481.039	11.807	504.088	7.50941	464.782	18.1015	430.688	8.95412	456.698	17.1294	420.847	9.49309	465.725	15.0518	434.351	9.76196	466.256	10.8356	446.854	8.90316	403.615	7.56576	430.11	8.48633	521.034	9.77293	445.507	9.77696	442.358	12.5154	472.417	8.37034	427.669	9.19244	446.378	11.5192	377.003	8.96272	454.768	8.65907	433.288	10.7794	465.318	8.43645	445.606
NIST610_8	320998	23500.4	454.324	16.7954	476.857	14.7731	511.262	13.0198	468.232	16.4684	419.479	13.8289	458.004	14.8555	428.229	12.0704	444.016	13.6121	435.523	9.9068	456.883	12.5562	443.022	10.1342	402.856	7.39492	415.099	7.11043	524.618	11.1172	452.573	10.9394	426.629	8.78546	467.997	12.9136	413.043	8.83774	439.426	10.5688	372.637	10.0113	446.238	9.71878	432.547	12.1575	456.581	9.92592	444.227
NIST610_9	328060	13297	501.837	25.7367	486.662	12.8251	514.601	12.6043	476.326	18.309	427.536	8.43462	456.715	14.2404	433.213	11.5542	460.502	14.7043	445.646	10.5261	477.949	10.5298	453.354	10.1412	413.102	8.19402	433.901	11.9781	536.919	12.371	458.468	11.7523	441.518	13.7559	483.865	10.4693	422.606	7.37599	454.851	12.2732	379.586	8.08336	456.905	12.561	442.856	9.72953	465.084	10.2732	455.411
NIST610_10	327752	12759.3	463.185	20.9992	476.239	16.6075	515.455	12.4934	465.782	22.8355	423.07	9.79105	469.618	20.3011	421.111	9.16122	452.346	24.8215	441.171	17.2138	460.541	11.0224	449.149	13.987	405.221	9.70343	435.443	15.2496	519.998	13.6204	453.073	11.5677	443.639	13.1612	476.151	12.5866	423.265	12.7119	446.776	10.0785	375.027	10.3097	452.562	14.6774	439.761	10.3715	461.069	13.9838	448.333
NIST610_11	329476	20889.6	482.804	30.3126	496.047	20.7119	520.873	23.1735	483.604	27.5368	437.398	16.4471	476.838	24.9917	434.936	12.8913	472.751	29.8239	445.538	18.0488	474.143	20.0054	463.719	18.8945	412.372	16.317	440.793	16.1174	532.107	23.376	465.838	18.8144	452.238	19.0287	485.332	20.7258	433.301	14.9416	455.325	18.7319	387.249	14.5233	463.307	17.8764	451.85	19.7664	473.621	18.0555	465.545
NIST610_12	328572	24359.3	455.251	21.143	481.419	15.4023	501.869	10.4746	471.992	24.7108	404.001	9.45696	470.658	18.1118	427.72	12.5364	447.492	19.1302	428.631	11.2677	463.119	14.156	443.016	8.91748	400.571	11.3982	428.169	11.6701	514.95	11.8648	457.281	12.608	440.417	12.8021	469.935	12.0919	424.649	11.0275	439.051	11.1487	376.882	10.0355	448.609	12.1627	438.62	11.1769	460.902	12.5368	446.032
NIST610_13	306716	22419	437.242	33.8143	486.561	18.6201	508.227	16.4761	469.11	22.9244	426.083	16.5179	453.049	18.9654	424.334	13.9488	449.591	20.5507	432.394	14.5403	457.612	12.6165	458.349	14.791	401.921	12.0594	433.016	16.1404	530.565	23.4541	451.524	12.7981	437.78	15.5457	473.985	16.2	422.568	14.3558	448.394	14.1156	378.886	11.6899	457.526	15.0104	437.609	18.0682	466.384	13.2637	454.639
NIST610_14	324863	20666.2	453.556	25.8246	471.928	13.7451	503.909	15.1985	457.342	13.7251	420.656	17.2577	463.228	14.6617	420.685	11.7028	452.257	16.7668	426.962	12.8135	455.941	11.4008	446.684	15.8685	399.652	8.35452	428.026	13.6887	525.762	13.5232	449.001	13.1396	435.635	13.3684	468.901	14.7509	418.346	12.3235	438.439	12.7822	378.067	12.2614	443.511	13.8424	436.096	13.0338	459.055	14.5399	445.576
NIST610_15	310843	20089.1	468.833	29.5086	491.551	13.9831	502.192	13.86	469.232	18.9742	421.493	16.9297	465.371	17.7973	433.146	8.56274	460.057	16.3159	430.159	15.1036	461.296	12.3455	457.095	14.2347	404.443	11.0583	436.1	11.5761	530.201	21.1582	462.348	13.5496	450.156	11.2618	472.289	18.0489	427.589	7.63252	447.714	14.6467	383.736	9.53922	461.416	13.562	437.552	14.3138	469.663	12.3372	457.397
GH19-02
GH19-02_1	246737	18121	688.919	52.7749	26.1604	0.952355	6234.57	210.593	177.688	7.79823	421.973	22.2	1319.11	50.2421	46.3188	1.87399	169.825	7.78741	36.6012	1.68158	114.332	3.96238	15.9144	0.661384	1.56951	0.62216	21.2598	0.724376	81.4419	3.64713	22.7326	0.782175	120.668	4.74387	7.9113	0.4285	2.97791	0.288258	0.934456	0.0965031	0.418501	0.0377759	188.137	5.76111	16.9641	0.725444	39.6553	1.49805	4.80883
GH19-02_2	250174	15991.9	697.97	52.1843	25.5474	1.03463	6212.05	146.504	183.149	8.673	422.19	16.6359	1330.38	56.4777	46.1777	1.85131	176.141	9.48178	33.3368	1.13505	113.603	3.50394	16.1024	0.710137	1.68898	0.601865	21.3681	0.639027	82.2478	3.24492	22.6323	0.665763	120.087	4.9399	7.68589	0.296988	3.21588	0.197539	1.01284	0.176582	0.442954	0.0396584	186.036	6.69552	17.0418	0.51625	38.6781	1.49216	4.58752
GH19-02_3	236643	11848.9	675.779	35.5549	26.8339	0.683363	6282.54	180.374	187.62	6.20906	422.46	14.2981	1331.64	47.2124	46.0242	1.19593	174.82	6.37855	32.9672	1.29849	118.907	3.96885	16.2681	0.411112	1.71322	0.615469	21.3234	0.752846	81.8112	3.04986	23.242	0.557759	120.417	3.19359	7.7519	0.211982	3.1234	0.232972	0.749244	0.142578	0.419712	0.0400396	188.286	4.28608	17.1547	0.483897	38.7102	0.758969	4.63338
UN18-05
UN18-05_1	235109	17723.8	66.8054	16.8309	44.1539	1.85595	6880.16	234.952	251.695	10.279	362.317	15.8922	1252.96	40.5534	82.5342	2.53343	134.31	5.36372	51.2954	1.90911	80.6141	6.84767	13.7157	0.751435	0.593049	0.789998	0.796532	0.0774174	149.062	6.37618	13.4976	0.511392	16.3994	0.563436	0.214143	0.0277054	1.96829	0.131077	0.681637	0.0949385	0.020972	0.0256962	9.07311	0.56294	0.649572	0.0471575	2.61184	0.280861	0.508416
UN18-05_2	232417	7609.93	76.1892	16.8865	45.6323	1.08183	6982.25	146.193	254.938	8.44084	371.323	9.05197	1226.75	25.4673	85.9554	2.117	135.323	5.3892	51.6996	1.57253	80.3006	3.08488	13.8453	0.494015	0.635335	0.774973	0.725923	0.0864998	148.933	3.51713	13.8567	0.333992	16.6399	0.375231	0.234262	0.0319671	1.85359	0.257661	0.702773	0.173123	0.0275898	0.0198628	9.20698	0.587982	0.683648	0.0477706	2.53369	0.100577	0.528135
UN18-05_3	225915	11816.9	103.11	14.1934	45.495	1.39405	6900.43	167.999	262.059	8.47032	361.971	13.4476	1270.83	30.1396	86.8046	2.09981	136.685	6.44146	50.6178	1.60483	80.9649	3.41193	13.8557	0.509349	1.11523	0.612525	0.716738	0.0728238	148.417	5.73617	13.7078	0.494	16.6172	0.522575	0.22066	0.0220968	2.00725	0.164742	0.774464	0.109847	0.0280145	0.0226234	8.88048	0.393223	0.662656	0.034324	3.07541	0.856191	0.533168
[truncated: 33 more columns]

## Sheet: Details_5Sep2025
Laboratory and sample preparation details
Laboratory name	Tectonics, Metamorphic Petrology & Orogeny (TeMPO) Laboratory, Johns Hopkins University
Sample type/mineral	Whole-rock glass
Sample preparation	40–100 g of fresh rock was powdered in a tungsten carbide ring-and-puck-mill; 0.4 g of rock powder was flux melted with 3.6 g of lithium tetraborate; glass disks produced by quenching of the melt were broken, shards were mounted in epoxy, and the mounts ground to expose shards then polished to a 0.3 µm SiC paste finish
Laser ablation system details
Make, Model and type	Teledyne (Photon Machines) Analyte G2
Ablation cell and volume	HelEx II active two-volume ablation cell
Laser wavelength (nm)	193 nm ArF Excimer
Pulse width	4 ns
Fluence	4.0 J cm-2
Repetition rate	10 Hz
Ablation duration	60 s
Analytical 'spot' shape and size	Square; 50 µm x 50 µm
Sampling mode / pattern	Constant speed line raster
Raster velocity	10 µm s-1
Cell carrier gas flows	0.3 L min-1 He flow into ablation cup; 0.5 L min-1 He flow into ablation cell
Inductively-coupled-plasma mass spectromer (ICP-MS) system details
Make, model, type, analytical mode	Agilent Technologies 8900 triple quadrupole ICP-MS, operating in single quad mode
Sample introduction	1 cm inner diameter PFA tubing, 2.5 mm quartz injector; 5 cm sampling depth; Ni cones, high-sensitivity skimmer insert
RF power	1550 W
Make-up gas flow and position	0.90 L min-1 Ar, between cell and torch
Detection system	Single ion-counting SEM
Masses measured (and dwell times)	29 (10 ms); 31,43,51,52,55,59,60,88 (50 ms); 45,47,49,63,66,71,72,73,85,89,90,93,95,133,137,139,140, 141,146,147,153,157,159,163,165,166,169,172,175,178,181,208,232,238 (100 ms)
Total integration time	3.862 s
‘Sensitivity’ as useful yield	0.003%–0.005% U [100 x (#ions detected / #atoms sampled); Schaltegger et al. (2015)]
IC Dead time	41.6 ns
Data processing details
Gas blank	20 s on-peak zero subtracted
Calibration and standardsl strategy	NIST612 as primary reference material for geochemistry, AGV-2G, BCR-2G, BHVO-2G and NIST610 to assess accuracy
Common-Pb correction	No common-Pb correction applied
Data processing packages	Iolite v4.6.1 (Paton et al., 2011), using the Trace Elements Next data reduction scheme and a mean–median fit to the standard data
Uncertainty level and propagation	Elemental abundances in "Data_" sheets are ppm with 2σ internal uncertainty calculated from counting statistics of the ICP-MS. Uncertainty for each element–non-primary reference material combination calculated from % difference between measured and accepted value (accuracy) added in quadrature to the 2σ internal uncertainty. Session uncertainty calculated by 2sd value of above-calculated uncertai…
Discordance criteria	Discordance reported as the relative difference between the measured 207Pb/235U and 206Pb/238U dates; calculated as |1–(206Pb/238U date)/(207Pb/235U date)| and reported as %
Interpreted age transition	The transition from preferred interpretation of 207Pb/206Pb (for older) to 206Pb/238U (for younger) dates set at 850 Ma
Quality control and validation (materials)	AGV-2G (Jochum et al., 2005)
	BCR-2G (Jochum et al., 2005)
	BHVO-2G (Jochum et al., 2005)
	NIST610
Quality control and validation (results)	AGV-2G: 10.0% (excluding Si, P, Ti, Mn, Cu, Ga, Ge, Mo)
	BCR-2G: 14.3% (excluding Si, P, Ti, Mn, Cu, Ga, Ge, Mo)
	BHVO-2G: 16.8% (excluding Si, P, Ti, Mn, Cu, Ga, Ge, Mo)
	NIST610: 6.5% (excluding Si, P, Ti, Mn, Cu, Ga, Ge, Mo)
	All non-primary reference materials: 13.6% (excluding Si, P, Ti, Mn, Cu, Ga, Ge, Mo)
References
Jochum, K.P., Willbold, M., Raczek, I., Stoll, B. & Herwig, K., 2005. Chemical characterisation of the USGS reference glasses GSA-1G, GSC-1G, GSD-1G, GSE-1G, BCR-2G, BHVO-2G and BIR-1G using EPMA, ID-TIMS and LA-ICP-MS. Geostandards & Geoanalytical Research 3, 285–302.
Paton, C., Hellstrom, J., Paul, B., Woodhead, J. & Hergt, J., 2011. Iolite: freeware for the visualization and processing of mass spectrometric data. Journal of Analytical Atomic Spectroscopy 26, 2508–2518.
Schaltegger, U., Schmitt, A.K. & Horstwood, M.S.A., 2015. U–Th–Pb zircon geochronology by ID-TIMS, SIMS, and laser ablation ICP-MS: recipes, interpretations, and opportunities. Chemical Geology 402, 89–100.

## Sheet: Data5Sep2025
	Si29_ppm_mean	Si29_ppm_2SE(int)	P31_ppm_mean	P31_ppm_2SE(int)	Sc45_ppm_mean	Sc45_ppm_2SE(int)	Ti49_ppm_mean	Ti49_ppm_2SE(int)	V51_ppm_mean	V51_ppm_2SE(int)	Cr52_ppm_mean	Cr52_ppm_2SE(int)	Mn55_ppm_mean	Mn55_ppm_2SE(int)	Co59_ppm_mean	Co59_ppm_2SE(int)	Ni60_ppm_mean	Ni60_ppm_2SE(int)	Cu63_ppm_mean	Cu63_ppm_2SE(int)	Zn66_ppm_mean	Zn66_ppm_2SE(int)	Ga71_ppm_mean	Ga71_ppm_2SE(int)	Ge72_ppm_mean	Ge72_ppm_2SE(int)	Ge73_ppm_mean	Ge73_ppm_2SE(int)	Rb85_ppm_mean	Rb85_ppm_2SE(int)	Sr88_ppm_mean	Sr88_ppm_2SE(int)	Y89_ppm_mean	Y89_ppm_2SE(int)	Zr90_ppm_mean	Zr90_ppm_2SE(int)	Nb93_ppm_mean	Nb93_ppm_2SE(int)	Mo95_ppm_mean	Mo95_ppm_2SE(int)	Cs133_ppm_mean	Cs133_ppm_2SE(int)	Ba137_ppm_mean	Ba137_ppm_2SE(int)	La139_ppm_mean	La139_ppm_2SE(int)	Ce140_ppm_mean	Ce140_ppm_2SE(int)	Pr141_ppm_mean
NIST612
NIST612_1	368285	21322.7	47.8507	2.7766	40.3685	1.32936	43.3652	1.59419	37.737	1.99769	36.0516	0.964958	39.3404	2.02136	35.9852	0.960028	40.9461	2.05513	38.9197	1.14598	39.6642	1.371	36.2249	1.26196	35.1689	1.37003	35.4314	1.46097	30.44	1.08964	77.1789	2.22809	37.7252	1.42714	37.1451	1.43488	38.4241	1.4446	37.1937	1.56304	41.87	1.74644	39.058	1.27643	35.4482	1.29715	37.799	1.47173	37.1574
NIST612_2	350379	20613	49.1211	2.31411	40.0168	1.02115	43.1075	1.09156	37.9436	1.50999	36.1763	0.74754	38.2268	1.44693	35.9104	0.674218	39.4192	1.70817	38.724	0.937743	39.3946	1.07818	36.7715	0.955872	36.1017	0.962848	35.7754	1.00098	30.6254	0.74096	78.2713	2.22591	38.0476	1.14324	37.4842	1.19456	38.4715	1.06572	37.2452	0.970439	42.3418	1.02386	39.4905	1.20111	36.0406	0.917695	38.5057	0.98329	37.4904
NIST612_3	339803	19288.6	49.7955	3.50182	40.5658	1.4235	43.5851	1.56441	38.7582	2.10806	36.1832	0.934505	39.6557	2.13492	35.2891	0.871124	40.1129	2.07987	38.9744	1.41011	39.6567	1.41287	37.1914	1.60986	36.5961	1.38109	36.5793	1.1283	31.2151	1.15541	78.8722	2.70311	38.7173	1.47578	38.0474	1.36585	38.7524	1.39706	37.6998	1.41609	43.0541	1.6807	40.2756	1.48527	36.2367	1.28275	38.679	1.37831	38.0838
NIST612_4	335861	14718.4	48.0042	3.17579	40.4343	1.303	44.6926	1.94223	39.6137	2.83346	36.4301	1.32623	39.052	2.74672	35.3972	0.770562	39.5502	2.44203	38.4931	0.950934	39.1319	1.05211	36.6899	1.05192	35.8341	1.21816	36.5386	1.66633	31.1243	1.01595	77.2642	1.81669	39.0161	2.0938	38.2929	1.91025	38.4675	1.14545	37.6971	2.14764	43.9253	2.27776	40.0089	1.97811	36.7106	1.81328	39.1409	1.89018	38.1645
NIST612_5	331361	18289.4	47.805	2.51382	39.9927	1.15403	43.7621	1.31752	38.3076	2.19829	36.3529	0.63049	38.2519	1.9554	35.6391	0.684476	38.639	2.28294	37.9019	1.13285	39.1291	1.15227	36.8316	1.09097	35.9637	1.19608	35.955	1.03331	31.0728	0.806956	77.0548	2.03363	37.946	1.40681	37.6819	1.51076	38.8327	1.39451	36.8814	1.11772	43.1477	1.31735	39.1514	1.28103	36.2557	1.16323	38.7386	1.37605	37.7336
NIST612_6	333351	18114.1	45.997	2.67037	40.6415	1.21597	45.651	1.48265	39.1861	2.09923	37.0352	0.698339	38.8502	1.88169	36.0209	0.757825	38.89	1.99793	38.4111	1.26824	39.7615	1.33321	37.5986	1.12768	36.824	1.26996	36.682	1.09514	31.8586	1.01747	79.2621	1.3466	38.978	1.19951	38.2379	1.15136	39.6139	1.15094	37.7754	1.07155	43.4965	1.3266	40.0699	1.35458	36.56	1.06309	39.1364	1.0138	38.3939
NIST612_7	336691	22971.1	46.4684	2.00397	39.9846	0.874117	43.8098	1.10301	38.7829	1.60526	36.5069	0.829956	38.3451	1.45444	35.3716	0.832196	38.475	1.42894	37.3312	0.933161	39.0113	0.940224	37.106	0.911286	36.2228	1.02219	36.5966	1.26101	31.4966	0.939292	78.0249	1.47218	38.1684	1.17602	37.726	1.18574	39.0297	1.25327	37.2691	1.21324	42.8773	1.33897	39.1123	1.26984	36.2188	1.04648	38.4325	1.09563	37.9263
NIST612_8	328726	18987.5	48.6414	2.61495	40.7186	1.32334	45.4029	1.97325	40.3745	2.7116	37.4043	1.29055	38.5106	1.38105	36.1235	1.38262	39.1755	2.5445	37.2263	0.975669	39.4687	1.02136	37.3147	1.0194	36.4701	0.954403	37.5105	1.71991	31.7813	0.786903	79.4125	1.97897	39.4924	1.66911	39.0719	1.68653	39.1993	1.04225	37.838	0.843481	44.2981	1.98214	40.7046	1.85267	37.106	1.54797	38.6534	1.11536	38.9897
NIST612_9	327328	14486.5	45.5802	1.231	40.0559	0.714572	44.6025	0.839505	39.2699	0.666293	36.3743	0.732402	38.7416	0.907896	34.9315	0.626122	38.6833	1.10699	36.736	0.597928	38.7404	0.766149	37.1738	0.742127	36.1933	0.66433	36.3421	0.67622	31.8242	0.698126	77.9458	1.71664	38.6114	0.748039	37.8776	0.637482	39.3737	0.708528	37.655	0.850798	43.2489	0.887847	39.5039	0.774851	36.3003	0.748578	38.8438	0.787742	38.1166
NIST612_10	316020	15574.5	43.5119	2.11834	39.7293	0.850352	43.9132	1.06003	38.2222	1.20937	36.0609	0.516855	38.1493	1.20928	34.6829	0.451595	37.6028	1.37692	36.1937	0.97982	38.4162	1.075	36.8671	0.914726	35.9988	0.803025	35.6137	0.866605	31.3638	0.774879	78.622	1.46267	37.9636	0.938641	37.7889	0.866042	38.5692	0.823741	37.1407	0.975786	42.8408	0.999337	39.157	0.761744	36.0057	0.803279	38.2716	0.787207	37.9236
NIST612_11	323958	12732.8	47.2142	2.12605	40.1973	0.678695	44.9213	0.796025	39.5715	0.822795	36.6578	0.703812	39.1908	1.12517	35.3961	0.602862	38.1667	1.15151	36.8381	0.58894	39.1841	0.731124	37.2578	0.599611	36.5291	0.532744	36.689	0.805914	32.1379	0.583788	79.2741	1.24581	38.9295	0.748955	38.4752	0.69833	39.574	0.775473	38.5266	0.630307	43.5996	0.761329	39.9951	0.840696	36.2199	0.554199	38.9493	0.570303	38.5819
AGV-2G
AGV-2G_1	295810	11762.8	2308.48	151.545	13.1607	0.364933	6772.29	209.215	116.465	4.85803	16.0757	0.385866	754.261	30.7281	15.8079	0.377998	18.5877	0.816161	45.0257	1.11581	104.415	2.66878	20.1593	0.471114	1.38208	0.0742018	1.74089	0.132805	66.0365	1.54592	638.47	12.0283	17.8876	0.462403	214.503	5.34647	13.4605	0.340852	1.89441	0.066941	1.16966	0.0359686	1119.07	27.0215	36.8114	0.770223	67.8565	1.27602	7.75582
AGV-2G_2	294973	14396.2	2329.36	100.548	12.9906	0.455158	6822.94	250.879	118.651	5.95575	17.05	0.473985	760.809	37.3464	16.1163	0.535522	18.7508	0.933594	45.8381	1.50796	106.176	3.68492	20.7259	0.732323	1.33757	0.0942924	1.55426	0.119363	69.1249	2.21701	647.872	23.2163	17.5677	0.678438	215.318	9.59545	13.4135	0.455464	2.00982	0.0967821	1.2076	0.0437671	1140.16	43.8182	37.354	1.62219	68.0192	2.34133	7.75673
AGV-2G_3	297923	15992.9	2461.61	119.69	12.9007	0.373769	7059.12	195.835	127.094	6.38547	17.0351	0.614161	793.185	36.0041	16.3835	0.507012	19.1327	1.08593	46.2445	1.60068	106.886	3.21508	21.4046	0.630066	1.26339	0.0883855	1.7932	0.188494	71.6688	2.04487	659.351	20.9511	17.5388	0.472722	215.487	6.6317	13.7195	0.484037	2.01588	0.127625	1.23591	0.0411817	1158.37	34.6797	36.9595	1.2406	69.2178	2.54165	7.87897
AGV-2G_4	282445	20583.6	2400	88.0282	12.817	0.338608	6965.07	192.624	124.558	5.32852	16.9789	0.531659	768.688	30.3442	16.0753	0.473093	18.6946	0.899443	45.9768	1.22145	106.712	3.05885	21.2622	0.501697	1.37234	0.0762538	1.57299	0.116962	70.0801	1.84461	654.806	18.4856	17.4848	0.393041	213.114	5.80174	13.65	0.328421	2.03788	0.0878292	1.21	0.0355632	1133.75	33.6303	36.5626	0.756929	68.1771	1.64837	7.65991
AGV-2G_5	293265	15806.3	2399.1	117.706	12.9783	0.391536	7062.61	247.37	126.337	7.13778	16.709	0.618292	801.211	43.7981	16.3531	0.672294	18.6612	1.05334	45.8157	1.24215	107.342	3.21013	21.3505	0.788814	1.3858	0.111001	1.61696	0.114028	70.7085	1.99767	656.283	15.3521	17.5657	0.48483	214.825	7.4607	13.956	0.528269	2.00188	0.125836	1.21401	0.0421558	1139.78	29.6978	36.9626	1.05529	69.4634	2.40617	7.71937
AGV-2G_6	272063	16128	2320.88	149.407	12.9297	0.427086	7120.24	224.666	127.218	7.17594	16.9661	0.629308	802.924	46.1748	16.2928	0.467036	19.1423	0.871982	46.7488	1.90658	105.483	3.06479	21.5168	0.694713	1.44297	0.106536	1.68857	0.144063	70.935	2.59332	668.764	20.9219	17.7236	0.633789	217.068	8.28987	13.9431	0.525675	2.11127	0.13058	1.21594	0.0480426	1150.85	37.1427	37.1661	1.30603	69.7242	2.38471	7.78681
AGV-2G_7	281686	14034.9	2316.12	110.215	12.7955	0.318228	7014.62	147.135	122.834	6.28612	16.4478	0.441694	766.804	32.8726	15.91	0.621683	18.3151	0.998342	45.3875	1.27402	103.145	2.24753	20.9549	0.510284	1.4159	0.0793068	1.81943	0.121524	70.1307	1.74067	655.777	19.9552	17.6169	0.396528	212.564	5.51637	13.5952	0.338381	2.07004	0.11356	1.22271	0.031606	1124.9	21.1195	36.4823	0.805108	68.0762	1.60735	7.71673
AGV-2G_8	276786	15352	2296.73	122.348	12.707	0.368658	7045	195.55	124.856	7.10691	16.1242	0.246125	788.868	37.2121	15.7859	0.319508	18.5516	1.24053	45.9955	1.36311	102.69	3.33196	21.0446	0.763838	1.33052	0.0524762	1.64975	0.126161	69.9231	1.85548	642.212	9.7615	17.6702	0.459405	213.158	5.51187	13.5878	0.400792	2.02449	0.0728471	1.20079	0.0371606	1132.69	33.1687	36.5582	0.905649	68.4986	2.06516	7.71912
AGV-2G_9	279658	14894.3	2285.41	141.685	12.7778	0.366012	7082.26	233.577	123.933	6.23071	16.1962	0.406614	779.7	38.6121	16.0955	0.435306	19.1223	1.20938	46.1427	1.33905	103.377	2.96296	21.4139	0.689124	1.35862	0.0630158	1.82039	0.108167	70.6102	2.20121	664.131	17.1266	17.6299	0.522258	214.279	6.8447	13.595	0.411535	1.98099	0.0924656	1.21745	0.042689	1140.14	37.7691	36.8345	1.25197	68.5862	2.47004	7.74902
AGV-2G_10	281888	14889.6	2324.1	155.237	12.8798	0.373151	7145.32	262.546	126.904	8.59775	16.3816	0.407996	788.14	48.8089	15.6937	0.54502	18.5371	1.02242	46.4342	1.75216	103.704	3.45416	21.4083	0.739441	1.50151	0.0854758	1.72072	0.106455	71.6428	2.67785	671.421	19.2193	17.7714	0.670217	217.126	9.17765	13.8059	0.488749	2.0275	0.0858782	1.25294	0.0629114	1143.91	37.3984	37.1878	1.2649	69.2072	2.52976	7.89891
AGV-2G_11	281226	18399	2294.11	143.41	12.9205	0.470177	7196.86	206.396	125.126	6.45713	16.8164	0.310233	785.857	34.877	16.1498	0.39909	18.6669	1.04869	46.8324	1.58069	103.555	3.37241	21.3322	0.692659	1.47696	0.117209	1.68126	0.132079	71.9345	1.78544	675.644	16.4992	17.9683	0.590384	217.99	7.51862	13.7394	0.46199	1.9626	0.0714593	1.23416	0.0358823	1152.02	34.9075	37.1191	1.1219	69.4796	2.40179	7.8566
BCR-2G
BCR-2G_1	270551	56042.1	1767.9	278.863	35.0857	3.36356	14506.1	1039.58	466.717	105.644	15.3416	0.689913	1738.74	422.634	37.8774	1.48684	12.2209	1.76749	16.9839	1.31766	164.18	13.2712	22.2096	1.95042	1.60505	0.202806	1.99503	0.228819	45.7487	3.79088	333.54	25.7412	32.6031	2.73423	171.754	13.7494	11.9084	1.03526	255.185	22.098	1.13839	0.0983857	676.764	54.8587	24.9258	2.08556	51.8357	4.51253	6.61982
BCR-2G_2	261251	32629.7	1847.53	269.326	34.3071	3.49065	15195.6	1029.41	462.267	65.5596	15.8096	0.575108	1636.95	214.843	40.1126	1.2328	13.2436	1.74532	17.779	1.22738	168.361	12.5199	22.9329	1.5453	1.72482	0.174384	1.69382	0.240555	48.4311	3.19095	339.843	23.106	31.1427	1.96646	167.054	11.9032	12.2582	0.832904	272.882	17.4258	1.23674	0.0839775	700.895	43.1722	24.6399	1.64192	53.6544	3.31703	6.66871
BCR-2G_3	269661	22574.1	1801.14	150.255	31.5444	1.5896	14802	737.444	447.159	43.0729	16.1556	0.564145	1571.45	153.482	39.1501	1.04735	12.4352	1.19828	17.6187	0.953534	163.938	9.54608	22.655	1.19516	1.54572	0.119683	1.89877	0.199782	48.212	2.62575	331.864	13.1973	29.3506	1.66515	157.878	8.28101	11.7664	0.603385	266.013	15.2326	1.19528	0.0743797	671.863	38.2446	23.4705	1.26298	52.3409	2.71042	6.4292
BCR-2G_4	277865	15972.3	1807.75	125.521	32.1254	1.07319	15309	568.112	468.705	32.4583	16.002	0.279605	1649.01	138.514	38.3873	0.884799	13.0758	1.16975	17.4004	0.610203	163.973	5.48203	22.7954	0.761095	1.62022	0.170655	2.02499	0.116173	49.0131	1.47437	334.522	12.8769	30.5862	1.55132	164.545	8.79041	11.9126	0.366193	274.406	7.81218	1.22168	0.050954	681.792	24.2002	24.5894	1.46734	54.3775	3.15028	6.60504
BCR-2G_5	273490	18420.8	1769.05	138.237	31.3027	1.13643	14949.3	580.752	452.237	32.6842	16.1188	0.444175	1551.13	104.12	38.5688	0.982607	12.3247	0.865737	17.224	0.664235	159.409	5.70364	22.6633	0.730687	1.63286	0.0994062	2.09685	0.123569	48.2684	1.84488	337.431	13.1337	29.6206	1.23657	157.731	6.18136	11.7565	0.47214	266.522	9.79405	1.20704	0.0499565	675.02	26.5626	23.5044	0.942635	52.4045	2.19578	6.44707
BCR-2G_6	262641	10879.7	1771.66	89.5789	31.7142	0.993118	15285.7	420.265	470.225	35.1343	15.8441	0.341828	1599.2	106.07	39.4218	1.52379	12.0477	0.868631	17.6188	0.822014	164.778	7.66447	23.0938	0.549607	1.78026	0.196084	1.89577	0.236176	49.3992	2.12492	340.209	9.02568	30.105	1.03852	161.881	6.08001	12.1095	0.466997	273.581	11.2984	1.21734	0.0615447	690.682	27.8811	23.8181	0.957283	53.0653	2.27631	6.51988
BCR-2G_7	255849	13335.7	1758.75	98.3138	31.9423	1.02164	15243.2	488.351	459.028	26.3924	15.876	0.513356	1575.28	88.184	38.169	1.09832	12.1235	0.699234	17.0576	0.60734	159.874	6.28267	23.0202	0.899192	1.61394	0.149621	1.95521	0.115407	48.7438	1.66015	338.32	12.9627	30.1802	1.0274	162.432	5.8561	12.069	0.469412	272.137	11.0018	1.20747	0.0466782	684.196	26.6865	23.7994	0.865847	52.8619	2.04108	6.44238
BCR-2G_8	257939	11436.2	1753.31	84.7388	32.0172	1.03322	15300.3	500.948	459.387	23.4346	16.1796	0.347057	1587.72	76.8536	38.9996	0.88644	12.1988	0.685945	16.8438	0.469337	160.346	5.82087	22.835	0.882508	1.79009	0.222436	2.02098	0.140584	49.4369	1.65476	339.465	7.51049	30.5066	0.963036	161.55	4.17815	12.0511	0.407854	273.352	10.3664	1.21203	0.0414164	678.277	22.2088	23.9416	0.729685	52.7943	1.77772	6.49414
BCR-2G_9	259114	9829.84	1747	79.916	31.8344	0.969652	15223	450.977	457.623	20.7615	15.8289	0.278311	1571.83	72.7872	38.3525	1.03274	11.919	0.711422	16.927	0.519106	158.528	4.20846	22.7112	0.70214	1.59454	0.101409	2.00037	0.145995	48.8174	1.47837	344.449	9.1115	30.3346	0.911436	162.496	4.72541	11.9738	0.360105	270.757	7.81076	1.07399	0.0462033	680.789	20.4989	23.8263	0.767831	52.5531	1.59187	6.42309
BCR-2G_10	250712	12795.2	1722.38	58.0249	31.1036	0.617271	15160.9	298.969	454.385	17.8537	15.6346	0.312468	1559.92	43.2871	38.461	0.758442	12.0105	0.408933	17.0029	0.360867	157.246	2.53384	22.7266	0.536632	1.70501	0.114798	1.96262	0.125943	48.7087	1.34132	334.359	6.68429	29.7289	0.591217	159.547	2.97118	11.8287	0.220038	269.536	6.45474	1.19772	0.0342401	669.33	11.7358	23.4437	0.377062	52.2053	0.946906	6.41133
BCR-2G_11	259028	10209.5	1782.62	71.1264	31.7681	0.607982	15495.5	263.33	470.992	14.6328	16.2849	0.463807	1596.73	44.4696	38.3514	0.760257	12.2777	0.358418	16.87	0.35821	160.859	3.71976	23.2847	0.643996	1.78252	0.18513	1.93445	0.137967	49.277	0.913715	343.534	6.78815	30.5472	0.405382	163.898	3.0074	12.1693	0.252663	274.805	7.20293	1.22918	0.0376621	687.141	12.2897	23.9306	0.380875	53.3268	1.04694	6.45641
BHVO-2G
BHVO-2G_1	241207	11580	1384.32	81.5148	32.5209	1.09287	17846.3	763.175	327.413	21.6893	287.341	7.16672	1350.14	78.8608	46.0089	1.39855	127.26	8.59306	126.96	4.62883	118.204	4.8777	21.3855	0.672197	1.63738	0.0819094	1.90654	0.160335	8.96356	0.382443	393.787	14.8	23.3909	0.743316	158.106	5.35738	17.3767	0.550254	4.03925	0.181176	0.0996394	0.00629695	132.099	4.30822	15.3253	0.497904	37.7058	1.31439	5.28453
BHVO-2G_2	248038	13558.9	1313.77	80.9873	30.7843	0.863702	17799.9	635.774	331.777	22.4717	297.356	9.6913	1342.18	89.1027	45.7829	1.14744	124.978	8.15977	125.801	3.77318	118.673	4.29744	21.9929	0.906761	0.803	0.210145	0.931919	0.17961	9.33932	0.330779	392.558	11.9424	22.0907	0.644202	150.987	4.8516	17.1869	0.560717	4.21411	0.149096	0.100844	0.00561485	132.094	4.5111	14.8044	0.522319	38.2576	1.4908	5.10701
BHVO-2G_3	243900	16110.5	1346.14	100.278	30.779	1.38521	18110.1	825.552	346.789	32.152	304.438	7.26019	1367.64	108.122	46.9349	1.40135	127.064	9.67533	128.259	6.20905	119.915	5.86457	22.2035	0.980062	0.877778	0.177302	0.966837	0.2517	9.4318	0.43722	396.316	14.3918	21.8883	1.09071	148.335	6.93483	17.4166	0.766472	4.35317	0.197206	0.103953	0.0070669	132.886	6.15129	14.7094	0.637719	37.8828	1.74292	5.12071
BHVO-2G_4	253960	20710.3	1382.16	136.558	30.0786	1.29943	18225.5	833.509	348.825	27.9156	308.379	7.90852	1381.38	107.759	46.5036	0.756106	126.495	9.68343	126.865	5.6824	121.573	5.58284	22.4141	1.14398	0.984602	0.193974	1.17424	0.21592	9.56269	0.366069	389.631	16.0253	21.2966	0.979768	143.836	6.55986	17.3653	0.829225	4.41137	0.158802	0.103034	0.00380775	133.241	6.11417	14.4802	0.675248	37.9743	1.62985	5.07936
BHVO-2G_5	240884	20339.1	1324.23	117.487	30.8693	1.44774	18487.5	910.89	360.966	33.7723	305.692	9.5365	1389.07	133.513	46.7515	1.1779	129.521	13.1872	129.531	6.29414	122.145	7.17067	22.535	1.21899	0.775143	0.178332	1.16174	0.275187	9.67012	0.52516	400.367	20.5025	21.5399	1.03971	147.969	8.12924	17.6866	0.865679	4.44997	0.279472	0.110708	0.00838029	134.763	7.42518	14.8139	0.856655	38.415	2.13845	5.1682
BHVO-2G_6	247709	22918.9	1290.07	142.587	30.3505	1.98042	18528	1253.1	349.572	39.742	308.273	11.5063	1366.16	165.563	46.1154	1.99643	123.529	14.5554	124.66	7.83184	120.233	7.56919	22.1895	1.49986	0.933087	0.184558	1.44517	0.261014	9.58636	0.629317	398.121	24.6009	21.6989	1.5072	146.517	9.51763	17.2733	1.04978	4.3773	0.294103	0.0974224	0.00935096	133.62	9.07502	14.4827	0.916434	37.8147	2.46353	5.06259
BHVO-2G_7	237723	17728.7	1332.28	119.619	31.6907	1.67296	18508.8	922.122	343.219	33.2923	292.879	6.85625	1356.67	130.428	45.7811	1.07712	124.112	11.9136	124.86	5.9884	118.246	5.40946	21.9383	1.10666	0.498248	0.259235	0.720611	0.217973	9.26215	0.46023	398.599	19.2887	23.1094	1.26476	155.82	8.22024	17.6295	0.893167	4.23279	0.211322	0.101908	0.00785175	132.466	6.71839	15.1419	0.830135	38.0818	2.05207	5.19401
BHVO-2G_8	247305	18456.6	1379.75	115.212	30.475	1.6114	18639.9	970.483	357.325	32.0099	310.239	7.76417	1418.47	132.103	47.1427	1.30844	126.713	11.5777	129.252	6.49069	121.933	6.6679	22.5632	1.16616	1.13505	0.149042	1.30561	0.229757	9.70579	0.486217	405.326	17.7757	22.0528	1.09734	149.004	7.20387	17.8089	0.922938	4.43865	0.302652	0.110862	0.0084531	133.879	6.21985	14.6181	0.691497	38.7227	1.73291	5.15087
BHVO-2G_9	234275	16857.1	1371.66	99.6207	29.8792	1.21197	18628.1	858.662	357.805	33.45	312.6	6.14324	1390.68	133.238	46.4848	0.997208	126.477	10.6238	126.816	5.24422	123.266	6.65626	22.414	1.12028	1.0935	0.223924	1.38925	0.29094	9.80963	0.48056	401.042	15.6884	21.5934	0.964288	145.741	6.91869	17.6323	0.843456	4.42212	0.258759	0.103793	0.00879541	132.705	6.18027	14.5365	0.664461	38.1621	1.89614	5.08882
BHVO-2G_10	236690	20748.5	1343.73	119.011	30.2506	1.52086	18642.4	980.763	358.495	33.0117	314.593	9.48981	1401.49	127.094	46.6616	1.35591	122.57	10.3825	125.681	6.8293	122.109	6.57568	22.696	1.24384	1.04384	0.165464	1.23925	0.183617	9.93357	0.488033	404.161	17.5827	21.9188	1.12864	148.582	8.54182	17.5968	0.868865	4.41948	0.221823	0.106499	0.00917551	133.764	6.60764	14.6171	0.695105	38.7855	1.77442	5.1509
BHVO-2G_11	239820	19557.9	1312.16	113.781	29.5512	1.44563	18454.9	1014.87	358.882	31.3474	307.656	6.45004	1381	129.081	46.6791	1.07835	123.367	10.8517	124.776	6.15339	120.778	6.45239	22.4004	1.07599	1.07182	0.248415	1.09997	0.243158	9.75448	0.508276	401.559	16.4004	21.4657	0.978839	145.383	7.47326	17.5246	0.904409	4.4884	0.267024	0.107318	0.00610376	132.243	7.26435	14.3615	0.717437	37.9044	1.84183	5.12707
NIST610
NIST610_1	341047	15674.3	503.522	34.697	503.088	19.9381	509.017	23.0739	465.693	42.1246	421.42	6.93665	469.415	42.2045	428.138	8.70549	491.649	39.1357	436.807	20.3898	493.497	22.1625	444.989	16.6702	393.617	16.2074	395.482	15.721	411.637	18.1803	524.316	21.267	469.427	21.2702	448.474	18.6933	476.375	21.0228	427.453	17.2286	373.1	15.3346	453.797	17.4878	444.167	17.4507	453.236	19.8657	452.53
NIST610_2	338091	20834.9	473.502	21.7415	484.418	13.3293	500.47	15.5496	452.336	25.435	415.062	6.29866	456.598	26.4035	417.334	9.13761	469.017	23.145	425.048	13.2539	470.788	15.8734	438.362	14.7735	392.821	13.0474	393.134	12.946	409.534	13.8122	510.591	13.9774	460.99	14.2683	441.686	15.7764	467.829	14.064	421.439	15.3823	368.027	11.1227	451.606	13.8616	438.363	13.0961	448.882	13.8624	444.173
NIST610_3	338579	19941.6	465.393	12.8979	485.361	6.59666	502.399	8.83465	452.349	9.77689	415.385	5.98204	454.725	11.4459	415.867	5.10965	461.588	11.8994	424.981	6.97264	464.556	7.92477	439.944	5.44554	393.834	6.09838	394.055	5.94816	414.867	6.80343	520.844	9.15922	464.056	6.31564	443.92	8.17959	471.722	6.62976	420.918	7.13125	372.802	6.52349	449.586	6.41393	441.061	6.43971	452.952	7.15441	448.282
NIST610_4	329820	13420.5	466.953	11.3148	486.195	6.77333	499.091	7.7805	459.026	8.90403	423.77	5.83083	455.896	7.71785	420.361	6.61154	457.435	7.76852	424.399	3.50737	458.253	6.08777	438.587	5.37858	393.124	5.50458	394.847	4.84433	415.849	5.54839	518.363	11.8138	462.071	5.36696	449.51	5.12669	472.781	5.87901	427.635	6.78052	373.506	4.96839	449.519	5.44119	438.387	6.28596	455.024	5.92869	446.994
NIST610_5	344891	17154.3	455.014	23.9441	494.429	14.9183	509.033	14.2175	466.768	22.4507	427.867	10.41	455.85	19.5616	428.142	10.2481	452.72	20.5078	427.077	11.8399	462.065	13.2767	444.638	14.4217	399.176	11.4842	399.916	13.1987	425.565	11.6724	524.962	14.943	470.171	15.4566	451.613	14.9248	477.046	14.8858	427.739	12.8062	378.69	12.1262	451.008	12.9332	443.341	13.52	462.138	13.9306	448.099
NIST610_6	324917	13189	451.569	21.2351	488.743	15.4726	502.282	13.4944	457.622	25.4725	432.407	8.8216	445.37	22.4505	427.002	7.55705	447.595	17.9967	424.11	11.6252	452.862	13.4148	439.134	12.5117	391.647	12.2806	392.421	10.1654	421.55	10.4316	523.332	13.5815	464.438	14.4656	448.219	12.6536	473.768	13.3589	421.14	11.514	375.578	11.0566	442.82	13.9836	438.125	13.5982	451.067	12.9532	444.798
NIST610_7	323975	15487.7	450.512	16.798	495.91	9.29918	510.809	7.7582	468.57	14.0173	427.109	7.04174	454.377	11.4269	426.013	4.84074	452.208	12.7293	431.672	8.30691	458.519	8.88526	447.519	7.45576	396.814	7.59987	399.181	7.59992	427.021	7.46542	530.054	12.4188	474.719	7.83294	456.368	8.08074	480.464	9.40705	426.219	8.83051	381.358	5.57142	449.637	8.45794	446.453	7.8993	465.273	9.36068	454.915
NIST610_8	319637	18459.2	450.468	18.4553	501.206	14.399	515.919	16.8942	482.28	27.4421	428.465	8.81784	463.538	28.7224	418.517	7.17505	451.052	26.4613	414.157	12.4988	456.493	14.6282	450.316	13.1235	395.971	13.025	396.335	12.5121	433.608	14.8103	538.275	14.4435	480.563	16.4206	463.554	13.6409	489.177	16.3107	431.948	13.9031	385.696	12.9141	458.279	14.8976	452.436	14.7732	467.805	13.4276	462.727
NIST610_9	315871	19331.7	441.204	31.7062	498.999	21.8408	512.474	23.5201	481.231	39.9264	429.773	10.5987	459.9	36.8312	424.848	12.6036	454.382	37.8173	413.827	19.5007	448.887	21.4581	453.57	20.4344	397.096	17.985	397.441	18.3431	439.555	19.3964	526.347	24.7802	479.467	20.8439	459.713	18.0116	488.801	23.3648	433.835	21.1353	389.071	18.5695	453.046	20.2391	449.627	19.7081	468.197	20.8335	462.618
NIST610_10	319700	14938.8	446.445	18.4668	496.061	14.1783	508.739	13.4029	472.452	19.0848	426.922	7.9286	457.208	18.9498	424.622	8.53232	442.476	16.3156	416.405	11.7851	450.014	13.3349	445.979	13.8822	393.108	11.8986	392.983	11.4009	429.878	13.1707	527.45	16.6504	476.494	17.1195	458.195	17.4686	484.184	16.8968	426.533	14.1891	383.076	12.9779	451.181	15.7877	448.479	15.0534	465.447	15.761	458.612
NIST610_11	304761	11369.8	431.236	15.9325	481.401	12.2062	500.968	14.212	459.847	20.7972	425.799	9.20415	451.833	19.0072	416.921	8.20986	434.275	18.779	412.026	11.4543	445.538	11.1649	440.011	12.7281	390.228	9.64153	389.324	9.79305	425.956	11.7732	526.811	12.1253	471.226	13.3709	451.999	12.5003	478.999	14.9204	420.3	11.7056	378.131	10.0359	443.525	12.4103	445.37	11.7533	460.951	11.0884	452.584
MD19-22
MD19-22_1	286848	36927.2	365.607	45.7675	26.1346	1.9953	3687.39	279.145	113.879	16.0193	59.3634	2.20394	826.286	115.504	64.6805	2.51399	43.0665	5.3939	40.6892	2.81573	69.1232	5.73001	16.3902	1.31299	1.19451	0.365951	0.449514	0.582461	4.08149	0.309055	193.022	14.2274	29.7486	1.98613	389.892	27.331	5.70238	0.377628	1.97227	0.218437	0.739664	0.0435812	82.4257	6.29829	7.62093	0.545481	18.5534	1.82008	2.83002
MD19-22_2	292931	27702.1	357.649	38.1427	26.2376	1.49645	3766.77	222.084	114.833	11.0986	63.3281	3.23947	839.268	91.6503	68.7163	3.43709	45.0591	4.90689	43.0165	3.02596	72.3904	6.11324	17.0775	1.28415	0.450102	0.324807	1.8449	0.749036	4.22432	0.226999	199.043	11.6819	30.5417	1.64278	410.947	35.6567	5.88578	0.584566	1.92774	0.221273	0.811494	0.0804452	81.5676	4.12206	7.94093	0.627734	18.9926	1.67373	2.91759
MD19-22_3	274966	25683.3	369.478	44.5818	26.6304	1.66357	3811.58	254.694	116.69	13.4953	62.8137	3.17777	849.215	102.213	66.2658	2.34653	45.4939	4.90317	43.1779	3.00032	75.0007	6.24665	17.0692	1.31201	0.442688	0.360735	1.63618	0.5038	4.40458	0.39027	200.842	16.4157	31.6037	2.62524	418.945	34.6365	6.00674	0.558548	1.9121	0.169342	0.785608	0.0821243	87.505	7.58506	8.28179	0.758063	19.4376	1.72078	2.83359
PSB19-01
PSB19-01_1	208268	11556.9	78.5344	12.3142	51.5948	1.73147	1182.2	32.1554	107.437	4.64189	670.021	18.022	1678.61	61.9653	67.245	2.38307	144.567	8.24416	124.808	3.0333	88.1937	2.80223	12.1919	0.380644	1.08268	0.457346	1.56046	0.53016	5.021	0.214508	134.87	5.3681	19.6122	0.78858	51.1049	1.47942	0.114147	0.0245068	0.362403	0.101009	0.67579	0.041025	52.58	1.63673	5.96621	0.23717	11.2672	0.411228	1.82133
PSB19-01_2	211074	12289.2	92.6591	18.4776	50.2854	1.30332	1138.22	28.6968	105.412	3.61986	641.936	14.4077	1665.02	67.073	66.1585	1.47889	141.424	3.33124	123.88	2.96681	83.3848	2.36609	11.5123	0.30582	1.39246	0.522362	1.69904	0.398801	5.026	0.168409	131.869	5.0509	19.0584	0.670229	49.2566	1.4651	0.137102	0.0266753	0.354831	0.115562	0.592228	0.0264002	51.7577	1.54454	5.83894	0.158866	10.8582	0.371372	1.82009
PSB19-01_3	201766	11320.6	70.6624	12.5878	50.5997	1.75928	1160.83	39.9182	106.258	6.00019	661.234	18.9206	1667.04	74.3293	66.4326	1.68371	144.571	7.40403	125.012	4.06366	85.3675	3.4236	12.0446	0.474653	2.02032	0.434253	2.24318	0.43931	4.97239	0.153788	133.001	4.48424	19.2445	0.824054	50.0472	1.87163	0.126593	0.0210673	0.345477	0.0824628	0.665703	0.0524561	51.694	1.21787	5.84624	0.197815	10.9611	0.331026	1.79057
[truncated: 33 more columns]
