# Supplementary material for: Rapid propagation of subduction initiation throughout the Iapetus Ocean
Source: Research Square preprint supplement (doi:10.21203/rs.3.rs-7803086/v1), 2025-10-23
Supplement: Supplementary file 2 [file f23febb3629959b46e8a6502.xlsx]

## Sheet: Data_Boise_CAIDTIMS
										Radiogenic Isotope Ratios									Isotopic Dates
	LA-ICP-MS	Th	206Pb*	mol %	Pb*	Pbc	Pb*	206Pb		208Pb	207Pb		207Pb		206Pb		corr.		207Pb		207Pb		206Pb
Sample	labels	U	x10-13 mol	206Pb*	(pg)	(pg)	Pbc	204Pb		206Pb	206Pb	% err	235U	% err	238U	% err	coef.		206Pb	±	235U	±	238U	±
(a)		(b)	(c)	(c)	(c)	(c)	(c)	(d)		(e)	(e)	(f)	(e)	(f)	(e)	(f)			(g)	(f)	(g)	(f)	(g)	(f)
MD19-22
z2	z8	0.738809	0.266806	0.992753	7.09251	0.161641	43.8782	2489.64		0.231505	0.0565569	0.248859	0.590912	0.304083	0.0758109	0.0794535	0.76269		473.303	5.50496	471.45	1.14683	471.07	0.360933
z3	z7	0.70536	0.606515	0.990686	15.9895	0.473243	33.787	1937.11		0.221024	0.0564528	0.210387	0.589824	0.261714	0.0758108	0.07322	0.772282		469.226	4.65722	470.755	0.985894	471.069	0.332616
z1	z6	0.633507	0.559259	0.994016	14.4836	0.279411	51.8361	3015.15		0.198512	0.0566058	0.216819	0.591079	0.277126	0.0757667	0.12208	0.660505		475.217	4.79463	471.557	1.04535	470.805	0.554274
					Weighted mean from dates in bold (95% confidence interval): 471.03 ± 0.48 (0.50) [0.71] MSWD = 0.4, pof = 0.68, n = 3h
PSB19-01
z6	z3	1.07537	0.840468	0.99483	24.1861	0.362533	66.7141	3489.47		0.336978	0.0565719	0.13704	0.590148	0.190002	0.0756927	0.0722358	0.821214		473.89	3.03114	470.962	0.715996	470.362	0.32767
z3	z13	1.06528	1.35152	0.997806	38.8023	0.246634	157.327	8223.53		0.33382	0.0565144	0.0974485	0.589352	0.156603	0.0756676	0.0721108	0.895763		471.64	2.15626	470.454	0.589639	470.211	0.327002
z1	z11	1.10283	1.88693	0.998121	54.6331	0.294739	185.361	9604.35		0.34559	0.0564487	0.092628	0.58853	0.15375	0.07565	0.0728842	0.90907		469.065	2.05051	469.928	0.578385	470.105	0.330438
z7	z16	1.1002	1.14473	0.998833	33.1253	0.110984	298.469	15462.6		0.344767	0.0564914	0.084455	0.588875	0.145287	0.0756371	0.0691212	0.933865		470.739	1.86904	470.149	0.546751	470.028	0.313328
z2	z14	1.2716	2.24752	0.998544	67.5461	0.272021	248.312	12389.9		0.398477	0.0564558	0.0810333	0.588457	0.143106	0.0756312	0.0694004	0.943067		469.341	1.79375	469.882	0.538302	469.993	0.31457
z4	z6	1.25609	0.417175	0.995781	12.4951	0.146707	85.1704	4275.99		0.393624	0.0564169	0.172151	0.587657	0.226771	0.0755804	0.0748156	0.807224		467.814	3.81174	469.37	0.852286	469.689	0.338904
					Weighted mean from dates in bold (95% confidence interval): 470.07 ± 0.17 (0.22) [0.55] MSWD = 1.9, pof = 0.10, n = 6h
NL22-01
z6	z12	0.346518	3.14991	0.999411	75.6915	0.154016	491.451	30642.3		0.108529	0.0567678	0.0690946	0.604784	0.132336	0.0773023	0.0690069	0.958341		481.532	1.52627	480.265	0.506398	480	0.319202
z5	z6	0.298217	3.1492	0.999184	74.6854	0.213369	350.03	22118.6		0.0934018	0.0567935	0.0689935	0.604895	0.131814	0.0772816	0.0699643	0.949451		482.53	1.52377	480.336	0.504457	479.876	0.32355
z3	z16	0.324572	4.23691	0.999341	101.205	0.23171	436.773	27398.3		0.101656	0.0567514	0.0676426	0.604396	0.131407	0.077275	0.0690918	0.962014		480.896	1.49436	480.02	0.502642	479.837	0.31949
z7	z8	0.317626	1.75119	0.998861	41.7513	0.165703	251.965	15842.8		0.0994809	0.0567709	0.0752147	0.604561	0.138203	0.0772696	0.0723205	0.934245		481.65	1.66142	480.124	0.528727	479.805	0.334398
z4	z5	0.322962	3.65939	0.999432	87.3726	0.172517	506.458	31780.2		0.101153	0.0567658	0.066083	0.60436	0.130114	0.0772508	0.0704869	0.955883		481.454	1.45976	479.997	0.497678	479.692	0.325846
z2	z20	0.289887	3.51789	0.999448	83.2328	0.161368	515.794	32661.7		0.090794	0.0567163	0.0477497	0.603696	0.123253	0.0772332	0.0679168	1.04688		479.526	1.05513	479.576	0.47111	479.587	0.313899
					Weighted mean from dates in bold (95% confidence interval): 479.80 ± 0.17 (0.22) [0.56] MSWD = 0.8, pof = 0.53, n = 6h
NL22-04
z4	z11	0.219727	0.303665	0.991051	7.04884	0.227563	30.9754	2016.19		0.0687442	0.0572625	0.228249	0.636285	0.278859	0.0806261	0.0763307	0.739833		500.665	5.02538	500.004	1.10105	499.859	0.367128
z2	z1	0.239632	0.382128	0.995821	8.9191	0.133103	67.009	4316.93		0.074973	0.0571896	0.146099	0.635135	0.199543	0.080583	0.0742412	0.809598		497.862	3.21823	499.29	0.787009	499.602	0.356902
z1	z8	0.207281	0.35189	0.994946	8.13882	0.148356	54.8602	3569.75		0.0648522	0.0571296	0.220327	0.634108	0.26224	0.0805371	0.0838371	0.619877		495.548	4.85521	498.652	1.03326	499.328	0.40282
z3	z5	0.223978	0.135069	0.984864	3.13918	0.172281	18.2213	1192		0.0700764	0.0573129	0.408343	0.636136	0.469211	0.0805363	0.118984	0.605171		502.604	8.98755	499.911	1.85238	499.323	0.571686
					Weighted mean from dates in bold (95% confidence interval): 499.63 ± 0.32 (0.35) [0.64] MSWD = 0.9, pof = 0.42, n = 4h
GH19-02
z1	z6	0.0231578	3.4449	0.999247	75.5357	0.215444	350.604	23960.9		0.00725031	0.0569341	0.0658854	0.615526	0.130578	0.0784455	0.0704713	0.960565		487.987	1.45376	487.039	0.505166	486.837	0.330446
z3	z12	0.0252757	1.50077	0.999058	32.9277	0.11746	280.331	19149.9		0.00791349	0.0569333	0.0735375	0.615209	0.135825	0.0784062	0.0696557	0.945732		487.959	1.62262	486.84	0.525296	486.602	0.32647
z2	z16	0.0243659	0.436815	0.995644	9.58069	0.158603	60.4068	4142.06		0.00762884	0.0568549	0.150019	0.6137	0.20219	0.0783217	0.0728455	0.804052		484.915	3.31191	485.891	0.78077	486.097	0.341079
UN18-05
z4	M_z9	0.367594	0.362905	0.992476	8.77112	0.228346	38.4115	2397.81		0.115078	0.0569227	0.185006	0.61731	0.235088	0.0786885	0.0749945	0.756277		487.548	4.08248	488.16	0.911108	488.29	0.352666
z3	C_z10	0.388246	1.83981	0.99843	44.7181	0.240169	186.194	11488.8		0.121545	0.0570246	0.073673	0.618184	0.136988	0.0786591	0.069233	0.956015		491.496	1.62462	488.708	0.531377	488.114	0.325459
z2	C_z1	0.328185	1.50604	0.998322	36.0163	0.210145	171.388	10749.3		0.102742	0.0570198	0.0841794	0.618036	0.143829	0.0786471	0.0701181	0.918179		491.306	1.85636	488.616	0.557829	488.042	0.329573
z5	M_z12	0.537387	0.275725	0.989727	6.96885	0.237517	29.3404	1756.31		0.168238	0.0569151	0.244997	0.616579	0.297001	0.0786059	0.0783968	0.73735		487.254	5.40655	487.701	1.15022	487.796	0.368306
					Weighted mean from dates in bold (95% confidence interval): 488.07 ± 0.27 (0.31) [0.59] MSWD = 1.3, pof = 0.28, n = 4h
(a) z1, z2, etc. are labels for analyses composed of single zircon grains that were annealed and chemically abraded (Mattinson, 2005).
(b) Model Th/U ratio calculated from radiogenic 208Pb/206Pb ratio and 207Pb/235U date.
(c) Pb* and Pbc are radiogenic and common Pb, respectively. mol % 206Pb* is with respect to radiogenic and blank Pb.
(d) Measured ratio corrected for spike and fractionation only. Pb fractionation correction for analyses done with tracer solution BSU1B is 0.18 ± 0.03 or 0.22 ± 0.03 (1 sigma) %/amu (atomic mass unit) for single-collector Daly analyses,
based on recent analyses of EARTHTIME 202Pb-205Pb ET2535 tracer solution.
(e) Corrected for fractionation and spike. Common Pb in zircon analyses is assigned to procedural blank with composition of 206Pb/204Pb = 18.04 ± 0.61%; 207Pb/204Pb = 15.54 ± 0.52%; 208Pb/204Pb = 37.69 ± 0.63% (1 sigma).
206Pb/238U and 207Pb/206Pb ratios corrected for initial disequilibrium in 230Th/238U using a D(Th/U) of 0.20 ± 0.05 (1 sigma).
(f) Errors are 2 sigma, propagated using algorithms of Schmitz and Schoene (2007) and Crowley et al. (2007).
(g) Calculations based on the decay constants of Jaffey et al. (1971). 206Pb/238U and 207Pb/206Pb dates corrected for initial disequilibrium in 230Th/238U using a D(Th/U) of 0.20 ± 0.05 (1 sigma).
(h) 206Pb/238U date (Ma) ± random (+tracer) [+decay constant]. MSWD = Mean Square Weighted Deviation. pof = probability of fit.
References
Crowley, J.L., Schoene, B. & Bowring, S.A., 2007. U-Pb dating of zircon in the Bishop Tuff at the millennial scale. Geology 35, 1123–1126.
Jaffey, A.H., Flynn, K.F., Glendenin, L.E., Bentley, W.C. & Essling, A.M., 1971. Precision measurement of half-lives and specific activities of 235U and 238U. Physical Review C 4, 1889–1906.
Mattinson, J.M., 2005. Zircon U-Pb chemical abrasion ("CA-TIMS") method: combined annealing and multi-step partial dissolution analysis for improved precision and accuracy of zircon ages. Chemical Geology 220, 47–66.
Schmitz, M.D. & Schoene, B., 2007. Derivation of isotope ratios, errors and error correlations for U-Pb geochronology using 205Pb-235U-(233U)-spiked isotope dilution thermal ionization mass spectrometric data. Geochemistry, Geophysics, Geosystems 8, Q08006.

## Sheet: Details_27Aug2021
Laboratory, sample preparation and imaging details
Laboratory name	Tectonics, Metamorphic Petrology & Orogeny (TeMPO) Laboratory, Johns Hopkins University
Sample type/mineral	Zircon
Sample preparation	Mineral separation used zircon low magnetic susceptibility and high density; annealed for 60–66 h at 900 °C; mounted in 1 inch epoxy round, grains ground to mid section then polished to 0.3 µm SiC paste finish
Imaging type, instrument, conditions	Cathodoluminescence with Deben Centaurus detector on Thermo U3 FIB-SEM; 1.6 nA, 5kV, 10 mm WD
Laser ablation system details
Make, Model and type	Teledyne (Photon Machines) Analyte G2
Ablation cell and volume	HelEx II active two-volume ablation cell
Laser wavelength (nm)	193 nm ArF Excimer
Pulse width	4 ns
Fluence	1.5 J cm-2
Repetition rate	10 Hz
Ablation duration	30 s
Ablation pit depth / ablation rate	30 µm pit depth, measured using an optical microscope, equivalent to 100 nm/pulse
Analytical 'spot' shape and size	Square; 40 µm x 40 µm
Sampling mode / pattern	Static spot ablation
Cell carrier gas flows	0.37 L min-1 He flow into ablation cup; 0.4 L min-1 He flow into ablation cell
Inductively-coupled-plasma mass spectromer (ICP-MS) system details
Make, model, type, analytical mode	Agilent Technologies 8900 triple quadrupole ICP-MS, operating in single quad mode
Sample introduction	1 cm inner diameter PFA tubing with inline Teledyne 'SQUID' smoothing device, 2.5 mm quartz injector; 5 cm sampling depth; Ni cones, high-sensitivity skimmer insert
RF power	1550 W
Make-up gas flow and position	0.80 L min-1 Ar, between cell and torch
Detection system	Single ion-counting SEM
Masses measured (and dwell times)	204,206,207,208 (200 ms); 232,238 (100 ms)
Total integration time	1.0162 s
‘Sensitivity’ as useful yield	0.003%–0.005% U [100 x (#ions detected / #atoms sampled); Schaltegger et al. (2015)]
IC Dead time	41.6 ns
Data processing details
Gas blank	5 s on-peak zero subtracted
Calibration and standardsl strategy	91500 as primary reference material for geochronology, FC1, Plešovice and Temora II to assess accuracy
Common-Pb correction	No common-Pb correction applied
Data processing packages	Iolite v4.6.1 (Paton et al., 2011), using the U-Pb geochronology data reduction scheme (Paton et al., 2010) and a mean–median fit to the standard data, with an exponential fit to downhole fractionation correction; concordia plots made and final ages calculated in IsoplotR (Vermeesch, 2018)
Uncertainty level and propagation	Ages quoted at 2s absolute, propagation is by addition in quadrature. Reproducibility of primary reference material propagated where appropriate. Excess uncertainty = 2.5%.
Discordance criteria	Discordance reported as the relative difference between the measured 207Pb/235U and 206Pb/238U dates; calculated as |1–(206Pb/238U date)/(207Pb/235U date)| and reported as %
Interpreted age transition	The transition from preferred interpretation of 207Pb/206Pb (for older) to 206Pb/238U (for younger) dates set at 850 Ma
Mass discrimination corrections1	206Pb/238U fractionation error = 1.05%
	207Pb/235U fractionation error = 2.30%
	208Pb/232Th fractionation error = 2.03%
Quality control and validation (materials)	91500 (Wiedenbeck et al., 1995; Schoene et al., 2006); 1063.6 ± 0.3 Ma
	FC-1 (Paces & Miller, 1993): 1099.9 ± 1.1 Ma
	Plešovice (Sláma et al., 2008): 337.13 ± 0.37 Ma
	Temora II (Black et al., 2004): 416.78 ± 0.33 Ma
Quality control and validation (results)	91500 (206Pb/238U): 1058 ± 42 Ma (MSWD=1.3, p(χ2)=0.22, n=13/13)
	91500 (207Pb/206Pb): 1067 ± 27 Ma (MSWD=0.83, p(χ2)=0.61, n=13/13)
	FC-1 (206Pb/238U): 1067 ± 48 Ma (MSWD=1.1, p(χ2)=0.36, n=10/10)
	FC-1 (207Pb/206Pb): 1096 ± 26 Ma (MSWD=0.57, p(χ2)=0.82, n=10/10)
	Plešovice (206Pb/238U): 332 ± 16 Ma (MSWD=1.7, p(χ2)=0.074, n=10/10)
	Plešovice (207Pb/206Pb): 328 ± 31 Ma (MSWD=0.49, p(χ2)=0.88, n=10/10)
	Temora II (206Pb/238U): 418 ± 19 Ma (MSWD=1, p(χ2)=0.42, n=11/11)
	Temora II (207Pb/206Pb): 409 ± 31 Ma (MSWD=0.6, p(χ2)=0.82, n=11/11)
1Fractionation error calculated in Iolite from primary reference material
References
Black, L.P., Kamo, S.L., Allen, C.M., Davis, D.W., Aleinikoff, J.N., Valley, J.W., Mundil, R., Campbell, I.H., Korsch, R.J., Williams, I.S. & Foudoulis, C., 2004. Improved 206Pb/238U microprobe geochronology by the monitoring of a trace-element-related matrix effect; SHRIMP, ID–TIMS, ELA–ICP–MS and oxygen isotope documentation for a series of zircon standards. Chemical Geology 205, 115–140.
Paces, J.B. & Miller, J.D., 1993. Precise ages of the Duluth Complex and related mafic intrusions, northeastern Minnesota: geochronological insights to physical, petrogenetic, paleomagnetic and tectonomagmatic processes associated with the 1.1 Ga Midcontinent Rift System. Journal of Geophysical Research 98, 13997–14013.
Paton, C., Woodhead, J.D., Hellstrom, J.C., Hergt, J.M., Greig, A. & Maas, R., 2010. Improved laser ablation U–Pb zircon geochronology through robust downhole fractionation correction. Geochemistry Geophysics Geosystems 11, Q0AA06.
Paton, C., Hellstrom, J., Paul, B., Woodhead, J. & Hergt, J., 2011. Iolite: freeware for the visualization and processing of mass spectrometric data. Journal of Analytical Atomic Spectroscopy 26, 2508–2518.
Schaltegger, U., Schmitt, A.K. & Horstwood, M.S.A., 2015. U–Th–Pb zircon geochronology by ID-TIMS, SIMS, and laser ablation ICP-MS: recipes, interpretations, and opportunities. Chemical Geology 402, 89–100.
Schoene, B., Crowley, J.L., Condon, D.J., Schmitz, M.D. & Bowring, S.A., 2006. Reassessing the uranium decay constants for geochronology using ID–TIMS U–Pb data. Geochimica et Cosmochimica Acta 70,426–445.
Sláma, J., Košler, J., Condon, D.J., Crowley, J.L., Gerdes, A., Hanchar, J.M., Horstwood, M.S.A., Morris, G.A., Nasdala, L., Norberg, N., Schaltegger, U., Schoene, B., Tubrett, M.N. & Whitehouse, M.J., 2008. Plešovice zircon – A new natural reference material for U–Pb and Hf isotopic microanalysis. Chemical Geology 249, 1–35.
Vermeesch, P, 2018. IsoplotR: A free and open toolbox for geochronology. Geoscience Frontiers 9, 1479–93.
Wiedenbeck, M., Allé, P., Corfu, F., Griffin, W.L., Meier, M., Oberli, F., von Quadt, A., Roddick, J.C. & Spiegel, W., 1995. Three natural zircon standards for U-Th-Pb, Lu-Hf, trace element and REE analyses. Geostandards and Geoanalytical Research 1, 1–23.

## Sheet: Data_27Aug2021
	Composition							Corrected isotope ratios												Dates (Ma) 2
Sample ID	U	Th	Pb	Th/U	206Pb	206Pb/204Pb	±1s	207Pb/235U 1	±2s	206Pb/238U	±2s	Rho 206Pb/238U	238U/206Pb	±2s	207Pb/206Pb	±2s	Rho 207Pb/206Pb	208Pb/232Th	±2s	208Pb/232Th	±2s	±2s-sys	207Pb/206Pb	±2s	±2s-sys	206Pb/238U	±2s	±2s-sys	207Pb/235U 1	±2s	±2s-sys	Concordia	±2s	±2s-sys	Discordance 3
	ppm	ppm	ppm		cps				(%)		(%)	v 207Pb/235U		(%)		(%)	v 238U/206Pb		(%)		(Ma)	(Ma)		(Ma)	(Ma)		(Ma)	(Ma)		(Ma)	(Ma)		(Ma)	(Ma)	(%)
UN18-05 coarse grain mount
UN18-05C z1a	797.682	448.341	100.679	0.560734	75248.9	2357.75	338.803	0.583796	13.9976	0.0710127	15.9404	0.126489	14.0303	12.7707	0.0595135	4.31509	0.683267	0.0241117	4.42196	481.292	21.0312	24.2299	584.828	93.6617	94.7959	443.83	54.7743	55.8868	467.389	38.6408	40.3689	494.275	29.1648	31.6746	5.04055
UN18-05C z1b	675.465	346.216	78.5887	0.513186	65263.4	2157.55	356.748	0.590056	13.9957	0.0727207	15.9325	0.0301625	13.768	15.7483	0.0587415	4.37035	0.623131	0.024371	4.4922	486.42	21.589	24.7783	556.492	95.3102	96.3202	451.993	68.7418	69.6644	469.582	50.6275	51.9707	495.183	36.157	38.2176	3.74552
UN18-05C z2a	758.087	369.07	87.4302	0.485314	72894.3	1475.4	249.926	0.614129	13.9518	0.0724142	15.9648	0.365785	13.8333	15.7578	0.0613821	4.32428	0.576209	0.0254299	4.49184	507.314	22.5048	25.8325	651.612	92.8164	94.2351	449.934	68.4828	69.4005	484.515	52.8987	54.2678	536.287	39.6649	41.8695	7.13736
UN18-05C z2b	796.252	380.057	88.141	0.475835	77915.8	3970.46	1031.08	0.604033	13.9761	0.0735822	15.9992	0.381692	13.6225	16.1102	0.0597931	4.17556	0.669213	0.0248967	4.46192	496.87	21.8999	25.1775	595.009	90.4896	91.7041	456.655	71.0219	71.9336	480.333	52.3238	53.6841	518.772	33.9511	36.3439	4.92958
UN18-05C z3	3444.4	2450.36	495.614	0.71544	287924	6210.22	873.874	0.513224	13.9032	0.0630268	15.8943	0.121024	15.8744	15.9678	0.058903	4.17651	0.524866	0.0216724	4.48246	433.102	19.205	22.047	562.422	91.0095	92.0892	393.81	61.0013	61.7907	419.36	48.8765	49.9883	459.123	39.0965	40.7466	6.09264
UN18-05C z7a	1856.87	994.615	221.934	0.53766	158203	8708.97	2179.33	0.516666	13.9158	0.0640066	15.8923	0.183469	15.6312	15.9551	0.0584327	4.21604	0.456093	0.0239025	4.26739	477.149	20.1214	23.3915	544.94	92.1317	93.1335	399.751	61.843	62.6453	421.918	50.146	51.2433	454.325	42.064	43.5705	5.25386
UN18-05C z7b	1924.53	1040.95	233.197	0.542659	166844	7401.93	2017.58	0.519224	13.8864	0.065148	15.892	0.108856	15.3572	15.8359	0.0576965	4.13545	0.683069	0.0239706	4.3331	478.53	20.4911	23.7277	517.402	90.7862	91.7031	406.663	62.41	63.2326	423.686	46.2704	47.4673	451.656	30.8125	32.8163	4.01781
UN18-05C z5	795.434	560.252	131.44	0.663848	75146.9	1082.57	163.04	0.653593	14.1794	0.0714955	15.9494	0.519407	14.0083	15.8144	0.0662619	5.27459	-0.118616	0.0254052	5.35299	506.92	26.7978	29.6433	813.66	110.285	112.146	444.501	67.9247	68.8277	509.638	69.1369	70.301	404.081	91.6468	92.2019	12.781
UN18-05C z6a	837.859	412.149	92.136	0.489694	78984.2	3673.87	1068.54	0.57922	13.965	0.0716824	15.9902	-0.103014	13.9855	17.5146	0.0580042	4.19106	0.861798	0.0241398	4.26711	481.884	20.3187	23.6216	528.776	91.8374	92.784	445.201	75.3453	76.1629	459.017	51.9385	53.1911	483.926	22.1996	25.2821	3.00989
UN18-05C z6b	668.297	343.09	76.472	0.497269	65803.4	4075.62	1693.62	0.58958	13.9177	0.0746285	15.9209	0.344333	13.413	16.1583	0.0571737	4.32	0.460572	0.0241638	4.63618	482.278	22.0936	25.1694	497.106	95.1781	95.986	463.536	72.2687	73.1919	469.217	55.1511	56.3848	477.302	43.2458	44.8618	1.21082
UN18-05C z6c	1089.84	657.858	146.626	0.60032	97841.7	9744.64	4839.75	0.557012	14.1631	0.0693945	16.2174	0.316516	14.5071	16.6516	0.0581743	4.27984	0.869411	0.0241469	4.44271	482.081	21.1653	24.3561	535.186	93.6854	94.636	429.716	69.2234	70.0521	446.709	47.3533	48.6524	476.022	20.9563	24.0996	3.80407
UN18-05C z8a	1236.75	675.728	159.648	0.550523	110926	3223.14	684.291	0.567756	14.1603	0.0683518	16.1323	0.00718542	14.7018	15.9931	0.0601467	4.25168	0.878994	0.0253696	4.33757	506.132	21.6832	25.1052	608.002	91.936	93.1841	424.208	65.6595	66.5105	454.035	45.4777	46.8728	505.933	19.8098	23.5033	6.56925
UN18-05C z8b	2295.27	1677.6	370.411	0.704617	196035	3134.53	473.248	0.549901	14.0615	0.0643965	15.93	0.218231	15.5472	15.8739	0.0618561	4.78181	0.391118	0.0241664	6.11987	482.475	29.1777	31.5726	668.31	102.364	103.719	401.846	61.8415	62.6522	443.92	52.7859	53.9399	486.349	52.1318	53.5309	9.47786
UN18-05C z8c	2792.46	3474.2	693.961	1.26713	228275	2417.77	337.086	0.540417	14.0391	0.0616754	15.9358	0.21732	16.2348	15.8314	0.0634585	4.63228	0.447761	0.0215011	4.52233	429.74	19.2276	22.0255	722.728	98.2725	99.9197	385.325	59.2134	59.9919	437.577	51.0733	52.2318	496.003	50.8652	52.3548	11.9412
UN18-05C z9a	788.909	363.754	79.9132	0.462888	75070.5	10238.4	6063.57	0.562641	13.889	0.0716698	15.9082	0.710183	13.964	15.9769	0.0568805	4.44222	-0.246379	0.0235758	4.37173	470.834	20.3468	23.5063	485.891	98.0547	98.8042	445.865	68.8282	69.725	452.424	64.2741	65.2617	456.203	65.8144	66.7953	1.44966
UN18-05C z9b	867.906	415.812	94.7589	0.480945	83798.7	6364.99	2124.76	0.574013	13.9033	0.0727898	15.9199	0.524906	13.752	15.9341	0.0571192	4.31274	0.239786	0.0244675	4.3729	488.392	21.1013	24.3792	495.178	95.0553	95.858	452.502	69.6293	70.5422	459.59	57.2097	58.3521	468.604	50.7004	52.0362	1.5422
UN18-05C z10a	1761.63	1652.2	346.777	0.921071	152926	10310.4	3591.37	0.526674	13.9175	0.0651104	15.8915	0.306214	15.366	15.9513	0.0581585	4.23539	0.601455	0.0228535	4.85983	456.421	21.9334	24.7239	534.81	92.7063	93.6655	406.439	62.8295	63.6459	426.245	48.1204	49.2862	457.262	35.5001	37.2953	4.64684
UN18-05C z10b	831.724	446.837	101.45	0.539161	80737.4	6484.94	3019.34	0.57915	13.9392	0.0729349	15.8949	0.0895697	13.7181	15.999	0.0574465	4.34648	0.434084	0.0243099	4.39552	485.237	21.0769	24.3186	507.86	95.5746	96.4143	453.583	70.0745	70.986	462.64	54.4201	55.6356	475.168	44.1045	45.6762	1.9578
UN18-05C z13a	595.435	586.937	124.186	0.98784	54830.8	3103.51	864.731	0.559121	13.9619	0.0691944	15.8861	0.319561	14.4574	15.979	0.0584514	4.40553	0.170634	0.0228221	4.41109	455.829	19.8815	22.9158	545.688	96.2715	97.2333	431.145	66.6394	67.5055	449.693	57.5281	58.6163	469.929	55.4692	56.6996	4.12453
UN18-05C z13b	415.866	338.089	74.886	0.81509	38823.8	2858.42	1241.22	0.555377	13.8883	0.0700233	15.9034	0.466362	14.291	15.8938	0.0577623	4.44937	0.149669	0.0236768	4.3893	472.808	20.5106	23.6728	519.683	97.6423	98.5028	436	67.0063	67.8871	449.585	57.5779	58.6647	463.982	55.0134	56.223	3.02168
UN18-05C z14a	1422.86	922.565	202.771	0.64361	122156	22236.7	20585.7	0.520331	14.0227	0.0652271	16.1948	0.602796	15.4113	14.5207	0.0578051	4.24822	0.880191	0.0237274	4.46533	473.794	20.9088	24.0308	521.582	93.2007	94.1084	405.28	57.0389	57.9318	423.128	37.9561	39.4026	450.707	18.0378	21.2679	4.21821
UN18-05C z14b	671.367	329.695	73.2398	0.47754	66323.5	4019.87	1436.73	0.598419	13.9054	0.0747554	15.8876	0.506158	13.3825	15.9595	0.0579607	4.33823	0.01531	0.0239301	4.37514	477.741	20.656	23.8603	527.264	95.0831	95.9925	464.555	71.5301	72.4668	475.26	62.5239	63.6428	486.839	60.2592	61.4761	2.25232
UN18-05C z14c	739.171	365.587	82.237	0.492045	71671.5	71671.5	853.375	0.574988	13.9744	0.0727892	15.8964	0.270957	13.7462	15.9633	0.0572015	4.52225	0.105692	0.0239803	4.49129	478.727	21.2469	24.3858	498.262	99.6088	100.385	452.686	69.7834	70.6951	460.263	59.6733	60.7726	468.185	56.343	57.5459	1.64626
UN18-05C z14d	1527.25	1274.05	256.802	0.844317	134511	19450.4	15083.8	0.534871	14.0162	0.0670664	16.1088	0.429856	14.9729	14.9653	0.0578001	4.24044	0.828321	0.0215853	4.97964	431.52	21.2618	23.8421	521.202	93.0312	93.9393	416.771	60.3964	61.2886	433.149	41.2436	42.6414	458.555	22.254	25.0332	3.78115
UN18-05C z15a	803.368	887.527	188.762	1.10865	74420.2	7411.96	3750.75	0.553352	13.8868	0.0696521	15.9073	0.190411	14.368	15.6934	0.057525	4.17789	0.542868	0.0227463	4.49749	454.446	20.2083	23.183	510.538	91.838	92.7207	433.739	65.8273	66.7144	446.13	50.0957	51.3222	464.614	37.9389	39.6771	2.77745
UN18-05C z15b	803.524	828.425	178.754	1.03286	73816.9	5366.81	2260.76	0.545003	13.9908	0.0691241	15.938	0.331147	14.4852	15.9411	0.0570729	4.58445	0.331908	0.0230732	4.41196	460.766	20.0989	23.1659	493.248	101.061	101.811	430.344	66.3614	67.2279	440.391	53.7906	54.9057	452.203	47.8174	49.1356	2.28138
91500
91500_1	91.7707	33.2975	16.4837	0.363651	20178.7	3132.33	2120.3	1.73777	14.149	0.165258	15.9429	0.280136	6.05927	15.6827	0.0761148	4.99782	0.224721	0.0530918	4.92003	1045.02	50.108	56.5098	1097.07	100.028	103.72	984.705	143.215	145.315	1020.17	98.8105	102.049	1058.4	73.3581	77.9842	3.47618
91500_2	89.104	31.9856	15.8158	0.360069	19642	990.41	318.753	1.73291	14.078	0.165655	15.9238	0.341864	6.04318	16.0245	0.0757735	4.85479	0.119516	0.0530445	5.15587	1044.07	52.4646	58.5989	1088.1	97.2963	101.027	987.136	146.672	148.734	1019	104.062	107.134	1056.73	76.8524	81.2663	3.12681
91500_3	84.8193	30.2633	15.2119	0.357965	18626	1371.35	523.49	1.72787	14.1429	0.165015	15.9505	-0.5175	6.06922	15.3748	0.0767382	4.79573	0.792441	0.0538338	5.05789	1059.22	52.1948	58.5279	1113.54	95.7512	99.716	983.207	140.204	142.343	1024.42	77.0212	81.1676	1063.93	36.5675	45.2177	4.02322
91500_4	84.0432	29.9506	14.7361	0.357398	18332.2	8211.17	13176.3	1.73401	14.1362	0.164017	15.9909	0.0489984	6.11029	15.892	0.0764741	4.59106	0.655219	0.0527573	5.39367	1038.69	54.6111	60.4705	1106.5	91.7541	95.8334	977.075	144.082	146.138	1017.81	85.7572	89.4526	1060.97	46.1421	53.2225	4.00217
91500_5	84.3965	30.3906	15.382	0.36173	18638.6	1782.36	864.719	1.76648	13.9943	0.167054	15.9249	0.217266	5.99261	15.7912	0.076576	4.54504	0.399431	0.0544917	5.05604	1071.86	52.7808	59.1935	1109.38	90.7961	94.9375	994.855	145.576	147.685	1031.28	94.4498	97.9055	1072.32	60.4577	66.1347	3.53246
91500_6	82.3134	29.4984	15.0811	0.359329	18416.7	5817.85	10575.1	1.75616	14.0218	0.168205	15.8976	0.409827	5.9487	15.9662	0.075633	4.81497	-0.00251539	0.0548797	4.52314	1079.33	47.5371	54.6614	1084.39	96.548	100.282	1001.66	148.119	150.221	1027.97	107.878	110.897	1060.84	81.3486	85.5626	2.55942
91500_7	81.8559	29.5228	14.6408	0.36203	18514.6	18514.6	727.604	1.77675	14.0332	0.17055	15.924	0.190896	5.86938	15.7795	0.0753875	4.6507	0.334217	0.0533612	5.03564	1050.2	51.537	57.8394	1078.02	93.3484	97.161	1014.18	148.084	150.239	1034.6	96.585	99.9883	1057.19	65.2554	70.4045	1.97372
91500_8	83.9595	31.1178	15.3779	0.37196	19416.7	6133.72	8987.36	1.83842	14.0012	0.173902	15.9418	0.0677125	5.7586	16.2581	0.0758382	4.86483	0.401377	0.05286	5.16028	1040.61	52.3361	58.4453	1089.95	97.4698	101.207	1032.21	155.07	157.203	1050.9	98.0927	101.55	1070.67	64.7756	70.0881	1.77853
91500_9	79.7859	31.0459	15.4318	0.39022	20042.5	20042.5	744.741	1.92027	14.15	0.188885	15.9677	0.527015	5.3039	15.5352	0.0737306	5.3516	0.0103675	0.0532288	4.79394	1047.71	48.947	55.5146	1033.18	108.144	111.186	1113.46	158.862	161.282	1086.61	109.269	112.596	1059.51	88.0232	91.9221	2.47102
91500_10	76.1789	29.8494	14.9421	0.393055	19846	19846	833.381	1.99227	14.2083	0.195837	15.9391	-0.393527	5.11331	16.1579	0.0735732	4.60935	0.746859	0.0536885	4.93924	1056.53	50.841	57.2929	1028.79	93.1929	96.6768	1151.47	170.384	172.799	1109.71	88.287	92.5433	1071.41	42.856	50.5379	3.76257
91500_11	71.87	29.0356	14.5934	0.405193	19000.8	19000.8	763.985	1.97781	14.1171	0.198846	15.9351	0.342144	5.03554	16.134	0.072078	5.08054	0.134824	0.0538517	5.40343	1059.6	55.7746	61.7457	987.285	103.387	106.293	1167.73	172.323	174.779	1106.25	109.487	112.926	1043.46	82.6351	86.6549	5.55766
91500_12	71.4597	28.8888	15.5178	0.405695	19689.6	19689.6	852.577	2.0619	14.125	0.207062	15.971	0.462055	4.83843	15.9822	0.0721433	5.22067	0.199448	0.0575918	5.22333	1131.17	57.4572	64.0394	988.978	106.208	109.048	1211.1	176.463	179.041	1133.91	107.861	111.524	1061.19	81.6169	85.8205	6.80772
91500_13	68.1953	27.661	14.1839	0.407318	18711.9	18711.9	814.936	2.08967	14.2199	0.206652	15.8994	0.0716731	4.84195	15.8222	0.0731555	5.15963	0.225349	0.0549602	5.42906	1080.87	57.138	63.2054	1017.48	104.513	107.564	1210.3	174.591	177.193	1143.02	106.306	110.08	1079.9	79.414	83.8776	5.88599
FC1
FC1_1	1095.95	779.4	409.379	0.719941	240806	14781.9	4640.49	1.78442	13.9968	0.166855	16.0025	0.0435551	6.00845	16.0855	0.0774299	4.14139	0.894321	0.0563102	4.26459	1106.7	45.9312	53.6206	1131.39	82.4565	87.1728	992.424	147.96	150.026	1036.73	81.335	85.3648	1085	23.9344	36.1748	4.27382
FC1_2	954.88	691.264	360.004	0.724919	213254	12015	4205.26	1.83056	14.0674	0.170976	16.0939	0.273893	5.87446	16.7452	0.0775501	4.20542	0.859436	0.0558834	4.26918	1098.48	45.6418	53.2666	1134.47	83.6928	88.3679	1013.37	157.024	159.054	1052.46	87.1849	91.0687	1095.38	28.4331	39.476	3.71386
FC1_3	1138.26	760.713	400.886	0.678958	253686	148595	396386	1.79812	14.0498	0.170152	16.078	0.100746	5.90002	16.003	0.0765254	4.11713	0.937192	0.0566355	4.3214	1113.01	46.7924	54.4406	1108.07	82.2618	86.8009	1009.31	149.51	151.624	1040.97	79.6293	83.774	1074.6	18.5937	32.6719	3.04199
FC1_4	1360.04	839.934	441.485	0.62922	295315	295315	27949.1	1.76183	14.0978	0.166534	16.0879	-0.117954	6.02815	15.9233	0.076534	4.12386	0.941404	0.0565102	4.25183	1110.53	45.9452	53.6819	1108.07	82.4017	86.9334	989.417	146.05	148.13	1027.04	78.313	82.4147	1067.43	17.8046	32.0801	3.66292
FC1_5	1317.67	783.503	418.589	0.614825	285808	29041.8	14741.6	1.79327	14.2251	0.169365	16.2092	-0.251508	5.93924	15.6683	0.0765941	4.06451	0.979818	0.057562	4.26008	1130.59	46.8404	54.7076	1109.64	81.2039	85.8116	1003.13	145.553	147.697	1037.17	76.1097	80.4054	1072.99	10.3573	28.7548	3.28189
FC1_6	809.424	648.405	341.854	0.796676	193413	14287.8	6360.8	1.91185	13.9832	0.180274	15.9681	0.0718923	5.52197	12.5427	0.076702	4.09309	0.90725	0.0565605	4.31656	1111.48	46.6866	54.3301	1112.5	81.7285	86.3313	1072.95	123.977	126.846	1086.08	59.9996	65.8573	1097.14	21.1887	34.6595	1.20865
FC1_7	919.08	738.87	384.215	0.805306	222660	222660	4454.73	1.90704	13.9145	0.181864	15.9254	0.300136	5.50466	15.798	0.0759237	4.1751	0.657866	0.0556645	4.31694	1094.27	45.9829	53.5052	1092.06	83.6194	87.9635	1076.06	156.565	158.86	1081.36	89.3213	93.3228	1086.97	44.6011	52.2273	0.490288
FC1_8	1145.86	767.392	413.118	0.679061	282844	48152.8	48508.2	1.94717	14.1338	0.188675	16.2218	0.401823	5.33447	15.8972	0.0747791	4.08768	0.968386	0.0577439	4.28705	1134.03	47.2766	55.1257	1061.69	82.2495	86.4261	1107.6	161.779	164.132	1092.22	80.1657	84.6885	1077.29	13.7591	30.2433	1.40811
FC1_9	990.451	741.872	400.37	0.758831	264445	244352	1.05162e+06	2.09035	14.1064	0.203008	16.0983	0.195403	4.94813	16.8915	0.0745558	4.16746	0.895489	0.057877	4.33585	1136.71	47.9266	55.7182	1055.76	83.9137	87.9668	1186.57	183.06	185.448	1141.14	91.081	95.4443	1097.55	26.6065	38.2203	3.98127
FC1_10	782.03	679.888	369.468	0.873112	221289	221289	11135.1	2.1874	13.933	0.213391	15.9141	0.213543	4.69022	15.7862	0.0741476	4.18697	0.588413	0.0583697	4.29254	1146.06	47.8308	55.7557	1044.65	84.4576	88.4033	1245.89	178.839	181.531	1174.3	95.6653	100.069	1105.6	52.2343	59.0964	6.09637
Plesovice
Plesovice_1	1238.73	147.876	23.1253	0.12031	77529.9	4219.57	1501.4	0.35216	14.1334	0.0473964	16.0771	0.213308	21.1843	16.6917	0.0538193	4.45709	0.696891	0.0167198	5.08496	334.985	16.8935	18.8554	362.511	100.525	100.932	297.338	48.5044	49.0707	304.823	36.7518	37.5335	317.236	26.2674	27.4386	2.45554
Plesovice_2	1159.6	138.621	21.5127	0.120486	72315.4	8856.15	6319.12	0.350499	14.1046	0.0471788	16.0105	-0.187569	21.253	16.1294	0.0537673	4.33429	0.822523	0.0166267	4.77999	333.197	15.7962	17.858	360.414	97.7866	98.2008	296.398	46.7236	47.3076	303.727	33.6111	34.4581	316.737	19.4129	20.9658	2.41298
Plesovice_3	1041.52	126.663	19.9167	0.122581	67925.7	7548.23	5575.25	0.363448	14.1622	0.0493175	15.9864	-0.158608	20.3237	16.5906	0.0533205	4.46304	0.731854	0.0168447	4.76536	337.369	15.9422	18.0358	341.42	101.036	101.396	309.631	50.1566	50.7504	313.387	36.8528	37.6764	319.572	24.7964	26.0517	1.19861
Plesovice_4	1037.87	125.602	20.0461	0.122111	67921	67921	2854.87	0.362791	14.2636	0.0496836	16.0525	-0.200893	20.1978	17.0188	0.0527933	4.58438	0.802368	0.017116	4.89683	342.931	16.6516	18.7291	318.759	104.195	104.499	311.515	51.7561	52.3388	312.37	36.6193	37.4427	313.809	21.6937	23.0687	0.273852
Plesovice_5	1140.03	139.87	21.9973	0.123777	74928.9	74928.9	3066.28	0.369565	14.0539	0.0498613	16.0441	0.169113	20.1204	16.4328	0.0536293	4.21696	0.847989	0.0168591	4.64476	337.767	15.5588	17.7026	354.529	95.2458	95.6573	312.685	50.1572	50.7627	317.686	35.5987	36.4739	326.933	18.4382	20.1685	1.57427
Plesovice_6	1055.5	130.438	20.4667	0.124542	71268.9	71268.9	2604.25	0.381487	14.0813	0.0510747	15.9959	0.165406	19.6281	16.6221	0.054083	4.45273	0.644406	0.0168122	4.96083	336.773	16.5688	18.5852	373.37	100.242	100.676	320.336	51.9449	52.5586	326.833	39.5917	40.426	337.089	29.5068	30.6866	1.98796
Plesovice_7	1025.86	133.43	20.888	0.131438	74972.3	39138.6	106687	0.401108	14.1519	0.055579	16.0849	0.190295	18.0692	16.9469	0.0522554	4.34931	0.790954	0.0167967	4.87285	336.575	16.2654	18.313	295.776	99.2599	99.535	347.239	57.2898	57.9438	340.631	39.8387	40.7387	329.548	22.7938	24.2371	1.94003
Plesovice_8	944.307	125.998	20.0547	0.134562	71811.8	71811.8	3138.63	0.416127	14.0194	0.0577074	16.0696	0.561426	17.396	17.293	0.0522139	4.29364	0.792399	0.0170799	4.69025	342.137	15.9111	18.0645	293.591	98.043	98.3174	360.31	60.599	61.2648	351.485	41.9961	42.9055	336.398	23.3039	24.775	2.51065
Plesovice_9	876.766	121.239	19.2214	0.139746	70262.2	70262.2	3062.34	0.441925	13.9115	0.0606398	15.8837	-0.020119	16.4965	15.9296	0.0526575	4.26525	0.617664	0.0170069	4.75012	340.746	16.0497	18.1703	313.152	97.0408	97.3561	379.389	58.6926	59.454	370.212	42.5392	43.5344	356.654	30.6451	31.9159	2.47892
Plesovice_10	886.297	123.33	19.9941	0.141053	72815.1	72815.1	3232.97	0.447819	13.9063	0.0621753	15.9789	0.251767	16.0081	13.2547	0.0517516	4.19259	0.780145	0.0173912	4.78858	348.293	16.5368	18.6891	273.349	96.0856	96.3283	390.619	50.2391	51.1794	374.144	32.3051	33.632	353.805	20.5562	22.3785	4.40352
Temora II
Temora2_1	363.185	268.235	51.5666	0.740497	29962.7	2984.17	1167.32	0.478092	14.0935	0.0621968	15.8787	0.0831345	16.082	15.8206	0.0556289	4.75076	0.14117	0.0206657	4.49034	413.319	18.3695	21.0762	436.63	105.773	106.335	388.877	59.7053	60.4916	395.828	52.0001	52.9333	401.35	50.693	51.6764	1.75613
Temora2_2	384.219	321.372	61.6837	0.836716	31678.1	5766.52	4881.22	0.483509	14.209	0.0620519	15.8831	0.365333	16.1206	15.6743	0.0563793	5.22912	-0.128331	0.0205667	4.55206	411.339	18.5348	21.1965	466.368	115.816	116.402	387.974	59.0173	59.8091	399.447	56.6296	57.5033	398.371	59.6017	60.4281	2.87202
Temora2_3	400.248	325.685	62.3229	0.815908	33047	1906.68	641.122	0.477831	13.9802	0.0620164	15.9049	-0.0849806	16.1368	16.18	0.0557659	4.32507	0.615852	0.0205411	4.34448	410.745	17.6626	20.4307	442.223	96.1951	96.8283	387.597	60.8651	61.6316	395.539	45.6652	46.7235	407.717	33.4288	34.9482	2.00781
Temora2_4	253.501	137.355	27.2515	0.538268	21350	2487.7	1833.85	0.489332	14.1091	0.0634166	15.8943	0.14605	15.7772	15.9042	0.0558552	4.80209	0.229893	0.021241	4.60232	424.597	19.3361	22.0581	445.809	106.738	107.318	396.164	61.109	61.9063	403.514	51.6798	52.6551	410.241	49.0495	50.1102	1.82142
Temora2_5	339.804	260.404	50.6948	0.769007	29137.3	9204.46	15246.5	0.484795	14.0963	0.0643641	15.9162	-0.0591572	15.5513	16.0385	0.0545176	4.64296	0.544799	0.0208297	4.54643	416.485	18.7396	21.4379	391.582	104.185	104.644	401.743	62.4688	63.2711	400.242	46.5052	47.5694	398.286	36.7148	38.041	0.375146
Temora2_6	302.159	243.361	48.295	0.808394	25859.4	3979.05	3110.91	0.486047	14.0702	0.0642561	15.9275	0.0840092	15.5809	16.2258	0.0547607	4.62399	0.487061	0.0212388	4.50942	424.597	18.9453	21.7164	401.43	103.58	104.065	401.004	63.0845	63.8761	401.067	48.1948	49.2267	401.149	39.3219	40.5806	0.0156894
Temora2_7	361.282	279.021	54.554	0.774959	31563.5	31563.5	1395.09	0.499379	14.0423	0.0657044	15.8953	-0.0354993	15.228	15.7123	0.0550131	4.5823	0.428101	0.0209554	4.42511	419.058	18.3523	21.132	411.624	102.456	102.971	410.006	62.4142	63.2503	410.25	48.4653	49.5386	410.546	41.0409	42.3048	0.0595201
Temora2_8	335.815	301.047	59.6365	0.898348	31674.9	31674.9	2133.92	0.53669	14.0306	0.0709933	15.8932	0.242149	14.0931	15.8751	0.0547419	4.69047	0.196431	0.0212449	4.45083	424.597	18.7016	21.5041	400.611	105.073	105.549	441.917	67.8037	68.6979	435.327	55.3873	56.4464	428.379	49.9542	51.0893	1.51389
Temora2_9	323.155	295.698	57.905	0.915822	31276.1	31276.1	1884.8	0.540401	14.1958	0.0729741	15.891	0.201996	13.71	15.8217	0.0536057	5.06902	0.0316236	0.021022	4.46234	420.245	18.5576	21.3252	353.686	114.506	114.847	453.841	69.3373	70.2595	437.704	58.5306	59.5447	424.661	54.1537	55.1845	3.68667
Temora2_10	312.163	287.814	57.0542	0.924151	30756.5	30756.5	1796.08	0.563685	13.9976	0.0743841	15.9049	0.18116	13.4531	15.8164	0.0552303	4.28799	0.285752	0.0213251	4.39245	426.378	18.5303	21.3774	420.542	95.7327	96.3083	462.205	70.5432	71.4833	455.292	55.6167	56.7695	446.273	47.0179	48.3235	1.51838
Temora2_11	208.813	95.4125	19.2405	0.458281	21548.2	21548.2	968.319	0.567739	14.0673	0.0777535	15.8873	0.131563	12.8661	15.8007	0.0528285	4.79925	0.165321	0.021678	4.66944	433.3	20.0153	22.7587	320.481	109.048	109.342	482.52	73.4594	74.4432	455.358	57.7439	58.8554	426.784	50.5102	51.6248	5.96482
1 Calculated assuming U isotope composition of Hiess et al. (2012)
2 Dates calculated in IsoplotR using Iolite output (isotope ratios)
3 Discordance calculated as [1 –(206Pb/238U date) / (207Pb/235U date)] and given as an absolute value
References
Hiess, J., Condon, D.J., McLean, N. & Noble, S.R., 2012. 238U/235U systematics in terrestrial uranium-bearing minerals. Science 335, 1610–1614.

## Sheet: Details_15Dec2021
Laboratory, sample preparation and imaging details
Laboratory name	Tectonics, Metamorphic Petrology & Orogeny (TeMPO) Laboratory, Johns Hopkins University
Sample type/mineral	Zircon
Sample preparation	Mineral separation used zircon low magnetic susceptibility and high density; annealed for 60–66 h at 900 °C; mounted in 1 inch epoxy round, grains ground to mid section then polished to 0.3 µm SiC paste finish
Imaging type, instrument, conditions	Cathodoluminescence with Deben Centaurus detector on Thermo U3 FIB-SEM; 1.6 nA, 5kV, 10 mm WD
Laser ablation system details
Make, Model and type	Teledyne (Photon Machines) Analyte G2
Ablation cell and volume	HelEx II active two-volume ablation cell
Laser wavelength (nm)	193 nm ArF Excimer
Pulse width	4 ns
Fluence	2.0 J cm-2
Repetition rate	10 Hz
Ablation duration	20 s
Ablation pit depth / ablation rate	20 µm pit depth, measured using an optical microscope, equivalent to 100 nm/pulse
Analytical 'spot' shape and size	Square; 30 µm x 30 µm
Sampling mode / pattern	Static spot ablation
Cell carrier gas flows	0.325 L min-1 He flow into ablation cup; 0.35 L min-1 He flow into ablation cell
Inductively-coupled-plasma mass spectromer (ICP-MS) system details
Make, model, type, analytical mode	Agilent Technologies 8900 triple quadrupole ICP-MS, operating in single quad mode
Sample introduction	1 cm inner diameter PFA tubing with inline Teledyne 'SQUID' smoothing device, 2.5 mm quartz injector; 5 cm sampling depth; Ni cones, high-sensitivity skimmer insert
RF power	1550 W
Make-up gas flow and position	0.71 L min-1 Ar, between cell and torch
Detection system	Single ion-counting SEM
Masses measured (and dwell times)	204,206,207,208 (200 ms); 232,238 (100 ms)
Total integration time	1.0162 s
‘Sensitivity’ as useful yield	0.003%–0.005% U [100 x (#ions detected / #atoms sampled); Schaltegger et al. (2015)]
IC Dead time	41.6 ns
Data processing details
Gas blank	5 s on-peak zero subtracted
Calibration and standardsl strategy	91500 as primary reference material for geochronology, FC1, Plešovice and Temora II to assess accuracy
Common-Pb correction	No common-Pb correction applied
Data processing packages	Iolite v4.6.1 (Paton et al., 2011), using the U-Pb geochronology data reduction scheme (Paton et al., 2010) and a mean–median fit to the standard data, with an exponential fit to downhole fractionation correction; concordia plots made and final ages calculated in IsoplotR (Vermeesch, 2018)
Uncertainty level and propagation	Ages quoted at 2s absolute, propagation is by addition in quadrature. Reproducibility of primary reference material propagated where appropriate. Excess uncertainty = 2.5%.
Discordance criteria	Discordance reported as the relative difference between the measured 207Pb/235U and 206Pb/238U dates; calculated as |1–(206Pb/238U date)/(207Pb/235U date)| and reported as %
Interpreted age transition	The transition from preferred interpretation of 207Pb/206Pb (for older) to 206Pb/238U (for younger) dates set at 850 Ma
Mass discrimination corrections1	206Pb/238U fractionation error = 1.07%
	207Pb/235U fractionation error = 1.01%
	208Pb/232Th fractionation error = 1.02%
Quality control and validation (materials)	91500 (Wiedenbeck et al., 1995; Schoene et al., 2006); 1063.6 ± 0.3 Ma
	FC-1 (Paces & Miller, 1993): 1099.9 ± 1.1 Ma
	Plešovice (Sláma et al., 2008): 337.13 ± 0.37 Ma
	Temora II (Black et al., 2004): 416.78 ± 0.33 Ma
Quality control and validation (results)	91500 (206Pb/238U): 1060 ± 13 Ma (MSWD=1.2, p(χ2)=0.22, n=21/21)
	91500 (207Pb/206Pb): 1063 ± 15 Ma (MSWD=0.85, p(χ2)=0.65, n=21/21)
	FC-1 (206Pb/238U): 1110 ± 15 Ma (MSWD=1.5, p(χ2)=0.078, n=18/19)
	FC-1 (207Pb/206Pb): 1113 ± 9 Ma (MSWD=0.79, p(χ2)=0.72, n=19/19)
	Plešovice (206Pb/238U): 337.3 ± 4.6 Ma (MSWD=0.67, p(χ2)=0.83, n=18/19)
	Plešovice (207Pb/206Pb): 356 ± 12 Ma (MSWD=1.2, p(χ2)=0.22, n=19/19)
	Temora II (206Pb/238U): 408.5 ± 6.3 Ma (MSWD=0.76, p(χ2)=0.73, n=16/18)
	Temora II (207Pb/206Pb): 442 ± 19 Ma (MSWD=1, p(χ2)=0.43, n=15/18)
1Fractionation error calculated in Iolite from primary reference material
References
Black, L.P., Kamo, S.L., Allen, C.M., Davis, D.W., Aleinikoff, J.N., Valley, J.W., Mundil, R., Campbell, I.H., Korsch, R.J., Williams, I.S. & Foudoulis, C., 2004. Improved 206Pb/238U microprobe geochronology by the monitoring of a trace-element-related matrix effect; SHRIMP, ID–TIMS, ELA–ICP–MS and oxygen isotope documentation for a series of zircon standards. Chemical Geology 205, 115–140.
Paces, J.B. & Miller, J.D., 1993. Precise ages of the Duluth Complex and related mafic intrusions, northeastern Minnesota: geochronological insights to physical, petrogenetic, paleomagnetic and tectonomagmatic processes associated with the 1.1 Ga Midcontinent Rift System. Journal of Geophysical Research 98, 13997–14013.
Paton, C., Woodhead, J.D., Hellstrom, J.C., Hergt, J.M., Greig, A. & Maas, R., 2010. Improved laser ablation U–Pb zircon geochronology through robust downhole fractionation correction. Geochemistry Geophysics Geosystems 11, Q0AA06.
Paton, C., Hellstrom, J., Paul, B., Woodhead, J. & Hergt, J., 2011. Iolite: freeware for the visualization and processing of mass spectrometric data. Journal of Analytical Atomic Spectroscopy 26, 2508–2518.
Schaltegger, U., Schmitt, A.K. & Horstwood, M.S.A., 2015. U–Th–Pb zircon geochronology by ID-TIMS, SIMS, and laser ablation ICP-MS: recipes, interpretations, and opportunities. Chemical Geology 402, 89–100.
Schoene, B., Crowley, J.L., Condon, D.J., Schmitz, M.D. & Bowring, S.A., 2006. Reassessing the uranium decay constants for geochronology using ID–TIMS U–Pb data. Geochimica et Cosmochimica Acta 70,426–445.
Sláma, J., Košler, J., Condon, D.J., Crowley, J.L., Gerdes, A., Hanchar, J.M., Horstwood, M.S.A., Morris, G.A., Nasdala, L., Norberg, N., Schaltegger, U., Schoene, B., Tubrett, M.N. & Whitehouse, M.J., 2008. Plešovice zircon – A new natural reference material for U–Pb and Hf isotopic microanalysis. Chemical Geology 249, 1–35.
Vermeesch, P, 2018. IsoplotR: A free and open toolbox for geochronology. Geoscience Frontiers 9, 1479–93.
Wiedenbeck, M., Allé, P., Corfu, F., Griffin, W.L., Meier, M., Oberli, F., von Quadt, A., Roddick, J.C. & Spiegel, W., 1995. Three natural zircon standards for U-Th-Pb, Lu-Hf, trace element and REE analyses. Geostandards and Geoanalytical Research 1, 1–23.

## Sheet: Data_15Dec2021
	Composition							Corrected isotope ratios												Dates (Ma) 2
Sample ID	U	Th	Pb	Th/U	206Pb	206Pb/204Pb	±1s	207Pb/235U 1	±2s	206Pb/238U	±2s	Rho 206Pb/238U	238U/206Pb	±2s	207Pb/206Pb	±2s	Rho 207Pb/206Pb	208Pb/232Th	±2s	208Pb/232Th	±2s	±2s-sys	207Pb/206Pb	±2s	±2s-sys	206Pb/238U	±2s	±2s-sys	207Pb/235U 1	±2s	±2s-sys	Concordia	±2s	±2s-sys	Discordance 3
	ppm	ppm	ppm		cps				(%)		(%)	v 207Pb/235U		(%)		(%)	v 238U/206Pb		(%)		(Ma)	(Ma)		(Ma)	(Ma)		(Ma)	(Ma)		(Ma)	(Ma)		(Ma)	(Ma)	(%)
UN18-05 medium grain mount
UN18-05M_z7a	2308.89	2192.14	477.722	0.959261	216215	9389.11	2342.74	0.582916	4.96818	0.0735193	6.36323	0.673598	13.6284	6.46777	0.0578616	1.49765	0.927931	0.0237117	2.78028	473.4	13.0075	17.5859	523.478	32.8553	35.3658	456.465	28.5031	30.7027	467.743	19.1474	22.4357	488.433	5.8683	13.5477	2.41104
UN18-05M_z7b	1174.28	539.906	121.689	0.464071	113194	10542.8	6098.82	0.60349	5.61074	0.0759704	6.96954	0.54097	13.2224	6.79456	0.0579678	2.48412	0.826762	0.0246789	3.21875	492.533	15.6629	19.9235	527.643	54.4424	56.0177	469.982	30.7989	32.964	479.913	18.9039	22.3898	490.455	11.7944	17.0132	2.0692
UN18-05M_z7c	1119.47	745.063	175.662	0.671897	108732	13543.5	8642.03	0.620722	6.91554	0.0764326	6.84168	-0.247803	13.1399	6.8797	0.0591603	3.0227	0.82437	0.025675	4.21347	512.239	21.3093	24.8612	572.011	65.7593	67.2962	472.827	31.3661	33.5196	490.162	18.3115	22.0334	504.07	13.0176	18.118	3.53648
UN18-05M_z6a	572.507	213.795	48.2666	0.378533	56301.7	6068.09	2257.07	0.620872	6.10683	0.0771884	6.7881	0.258263	13.0095	7.07163	0.0587152	3.15072	0.689091	0.0244987	4.29752	488.984	20.7642	24.0955	555.749	68.7323	70.1225	477.395	32.5416	34.6611	491.137	21.0531	24.3719	500.577	17.8259	21.7802	2.79806
UN18-05M_z3a	576.455	207.38	52.3641	0.362104	57691.4	4130.9	1190.12	0.645231	5.52073	0.078754	6.39038	0.423148	12.7245	6.58028	0.0598329	3.40427	0.355963	0.0274551	4.2982	547.267	23.2058	26.9388	596.458	73.7432	75.2357	487.693	30.9064	33.2243	507.256	24.9138	27.9556	510.492	25.2017	28.2489	3.85667
UN18-05M_z3b	1570.46	1316.34	302.693	0.837415	143485	1641.65	172.633	0.655177	6.0425	0.0735253	6.36487	0.480538	13.6281	6.6913	0.066136	3.34743	0.615742	0.0249984	3.44704	498.841	16.9845	21.0713	809.869	70.0188	72.8873	456.473	29.4863	31.6176	520.017	21.6846	25.2831	544.874	21.4101	25.3761	12.2198
UN18-05M_z1a	747.844	324.835	78.0444	0.418419	71830.9	2997.22	753.839	0.657394	6.8675	0.0780214	7.88097	0.266912	12.9642	9.00661	0.0615417	2.84998	0.870537	0.0272012	4.1906	542.155	22.4195	26.1981	657.197	61.1198	63.2896	479.003	41.5799	43.2699	511.067	26.8044	29.6938	554.535	13.2505	19.1773	6.27403
UN18-05M_z1b	911.504	474.837	107.18	0.524616	88545.7	10616	4809.77	0.613286	5.13726	0.0765392	6.34279	0.628442	13.0902	6.67147	0.0585065	2.65412	0.330787	0.024572	2.87002	490.364	13.904	18.5366	547.929	57.9681	59.5646	474.556	30.5205	32.7453	487.345	24.4284	27.2981	494.517	23.6351	26.6732	2.62407
UN18-05M_z2a	567.908	232.002	56.0837	0.398599	56475.3	4320.99	1436.33	0.639278	5.24167	0.0782013	6.07721	0.375113	12.7944	6.06577	0.0595911	2.75308	0.209025	0.02657	3.47002	529.761	18.1438	22.4633	587.744	59.7275	61.5083	485.124	28.3476	30.833	503.473	24.2742	27.3435	506.808	24.7989	27.8481	3.6445
UN18-05M_z2b	683.813	451.502	97.8705	0.661447	67433.8	2850.92	523.611	0.633121	6.03991	0.0787707	6.65542	-0.120777	12.7403	7.10296	0.0586277	2.73419	0.826161	0.0236976	4.97299	473.202	23.2589	26.0946	552.403	59.6702	61.2474	487.11	33.3245	35.4798	498.727	20.0313	23.5947	510.097	12.8726	18.1198	2.32935
UN18-05M_z4a	994.371	608.306	149.073	0.619284	97471.3	3963.73	999.765	0.635504	5.04784	0.0769646	6.2042	0.430975	13.008	6.14721	0.0602676	2.44773	0.308547	0.0266408	2.7466	531.138	14.4002	19.5879	612.31	52.8921	55.0627	477.447	28.2882	30.7033	501.409	23.2395	26.4047	513.326	23.1236	26.446	4.77897
UN18-05M_z4b	489.37	186.447	45.6488	0.38466	49042	3434.72	1155.5	0.639765	4.88806	0.0787132	6.44729	0.705412	12.7349	6.66843	0.059376	2.41869	0.496527	0.0266702	3.25838	531.728	17.0977	21.6574	580.08	52.5489	54.5133	487.31	31.2961	33.5837	503.925	23.263	26.4553	518.461	20.4475	24.2095	3.29705
UN18-05M_z5a	2097.93	1161.46	279.57	0.548875	196042	1350	102.338	0.694142	5.63002	0.0736117	6.25502	-0.0409339	13.604	6.28252	0.0687588	2.53512	0.680596	0.0266535	3.96605	531.335	20.798	24.6781	890.62	52.359	56.8966	457.255	27.7341	29.9976	536.751	20.518	24.5163	603.933	17.8523	23.3809	14.8105
UN18-05M_z5b	2717.22	1400.18	326.843	0.509337	252504	2150.72	520.997	0.651541	6.36665	0.0727482	6.28809	0.283425	13.768	6.43386	0.0654094	4.80536	0.211686	0.025558	3.55967	509.875	17.9244	21.9947	786.607	100.895	102.794	451.996	28.0853	30.2733	511.402	28.803	31.5131	474.092	28.2482	30.6339	11.6164
UN18-05M_z5c	1920	1254.03	302.924	0.641705	188518	1268.17	147.789	0.751604	7.10392	0.0792576	6.66191	-0.599552	12.6598	6.67433	0.0690356	3.39138	0.872493	0.0268019	3.11969	534.286	16.4512	21.191	899.008	69.9474	73.4695	490.093	31.4964	33.7956	569.146	17.7244	22.729	623.19	12.688	20.0926	13.8897
UN18-05M_z8a	502.404	161.645	36.9313	0.325151	48112.1	6235.52	3701.94	0.602242	6.48812	0.0753257	6.50416	-0.381637	13.3111	6.67633	0.0582568	3.19911	0.768072	0.0249173	2.85299	497.264	14.0138	18.7331	538.569	69.983	71.2664	466.962	30.072	32.2585	479.265	17.9175	21.5545	487.149	14.6152	19.0243	2.56708
UN18-05M_z8b	694.425	285.143	62.8626	0.414562	67256.4	5422.46	2003.61	0.607655	5.52026	0.0762287	6.49769	0.354904	13.1535	6.78197	0.0581745	2.5468	0.641423	0.0240214	3.24796	479.516	15.3913	19.509	535.186	55.7516	57.3346	472.354	30.8895	33.0698	483.235	21.1736	24.3776	493.18	17.1762	21.1433	2.2517
UN18-05M_z10a	453.995	156.927	35.9479	0.34581	44297.8	44297.8	4225.11	0.61785	5.42883	0.0768749	6.22152	0.0460488	13.0245	6.27295	0.0586326	2.65052	0.592954	0.0251617	3.89902	501.994	19.3316	23.048	552.403	57.8587	59.484	476.864	28.834	31.2014	490.091	20.0716	23.5157	499.278	17.7576	21.7056	2.69896
UN18-05M_z10b	480.471	168.981	38.6369	0.351838	46375.6	6540.24	5308.49	0.608262	5.44911	0.0765702	6.34633	0.258365	13.0835	6.24162	0.0579678	2.70341	0.507175	0.0251887	3.49243	502.585	17.3338	21.4086	527.643	59.2423	60.6931	474.791	28.5714	30.9389	483.963	20.786	24.0509	489.388	19.2827	22.8366	1.89528
UN18-05M_z9a	1122.16	692.363	165.859	0.598901	109580	2746.14	352.347	0.662148	5.38443	0.0774962	6.4539	0.125608	12.9345	6.50142	0.0623241	1.74863	0.829591	0.0267327	3.85945	532.909	20.2961	24.2781	684.148	37.3419	41.0725	480.063	30.0752	32.3814	517.073	20.8412	24.5246	577.204	10.187	17.6636	7.15764
UN18-05M_z9b	413.274	165.493	36.8652	0.388319	40830.3	3996.77	1485.71	0.641918	4.93538	0.0782883	6.19224	0.666252	12.7878	6.31487	0.0598672	2.59914	0.24202	0.0251959	3.48032	502.782	17.2809	21.3687	597.905	56.2903	58.2411	485.368	29.5255	31.9217	505.544	24.7696	27.8077	513.279	24.9794	28.0826	3.99103
UN18-05M_z9c	852.049	390.693	97.7856	0.46271	84658.5	3198.79	686.106	0.672966	7.01433	0.0781463	6.30462	-0.261018	12.8174	6.2829	0.0627779	4.6806	0.639063	0.027462	4.66673	547.267	25.1981	28.6729	699.829	99.6844	101.208	484.286	29.3129	31.7148	523.769	19.9617	23.8732	523.238	20.2572	24.1136	7.53825
UN18-05M_z11a	1224.85	738.461	165.827	0.609919	118921	12008.2	5605.72	0.600244	5.22535	0.0766208	6.26812	0.232278	13.0704	6.27804	0.0571546	2.18702	0.604572	0.0245189	2.752	489.378	13.3059	18.0756	496.335	48.1903	49.7621	475.249	28.7628	31.1202	478.885	20.0562	23.3577	482.551	16.0514	20.0794	0.759306
UN18-05M_z11b	911.746	415.492	94.7093	0.459478	87966.4	8114.37	2739.05	0.604301	5.31468	0.0760357	6.15148	-0.0534504	13.164	6.23732	0.0579682	2.36158	0.596273	0.0249513	2.98755	497.855	14.6941	19.2569	527.643	51.7685	53.4227	471.991	28.3862	30.7411	481.607	19.8941	23.2539	489.972	16.745	20.747	1.9965
UN18-05M_z11c	1420.76	870.663	192.873	0.617969	135036	7901.1	2436.94	0.601847	5.03659	0.0751829	6.1626	0.280488	13.314	6.21366	0.0584097	2.15144	0.59368	0.0243025	2.78341	485.039	13.3379	18.0261	544.192	47.0115	48.9405	466.863	27.9853	30.3216	480.164	20.0161	23.3397	493.74	16.2857	20.4349	2.77011
UN18-05M_z12a	1736.98	1534.41	330.968	0.890749	158035	5455.91	1208.56	0.596583	4.96195	0.0713992	6.07739	0.505018	14.0138	6.03288	0.0609676	2.23016	0.100614	0.0234236	3.07304	467.676	14.2066	18.3991	637.208	47.9824	50.5577	444.332	25.9036	28.1849	476.983	23.6662	26.5007	481.504	25.9257	28.584	6.84525
UN18-05M_z12b	1005.34	594.634	132.719	0.598803	95383.1	5029.21	1290.01	0.601465	5.42691	0.0745725	6.09427	0.1983	13.4187	6.17271	0.0588654	3.30654	0.216967	0.0243173	2.93472	485.434	14.0777	18.5865	561.312	72.0672	73.4207	463.346	27.5986	29.931	480.167	24.2532	27.0614	478.95	24.7826	27.5235	3.50307
91500
91500_1	90.9148	29.967	14.8675	0.332558	19652.3	19652.3	1294.53	1.77629	5.70269	0.170882	6.61048	0.436788	5.79481	4.28526	0.0759339	3.42665	0.530176	0.0544421	3.50736	1070.91	36.5786	45.3295	1092.32	68.6353	73.8684	1026.25	40.6529	48.0718	1047.58	24.9142	36.1469	1048.31	25.0164	36.2308	2.03605
91500_2	86.6501	30.1252	15.141	0.35032	19341.3	3814.88	4218.78	1.78387	5.83083	0.176174	6.04601	0.262104	5.67857	6.12743	0.0738247	3.90002	0.00317148	0.0548754	3.80338	1079.33	39.9698	48.2254	1035.64	78.7754	82.9211	1045.64	59.1402	64.6599	1042.41	47.2612	53.97	1042.02	46.9842	53.7228	0.309839
91500_3	81.8207	29.6815	14.8341	0.365214	18181	18181	1504.12	1.76949	6.32493	0.174986	6.41034	0.307584	5.72704	6.43171	0.073815	4.18836	0.24102	0.0549903	4.28383	1081.44	45.1107	52.592	1035.37	84.5961	88.4675	1037.46	61.6368	66.8715	1036.79	44.0247	51.0882	1036.68	43.568	50.6938	0.0649769
91500_4	84.8679	30.7203	15.2937	0.365062	18869.5	3066.56	2327.82	1.85988	5.71256	0.177769	6.16041	0.223505	5.63069	6.17849	0.0772581	3.01778	0.630899	0.0547759	3.88082	1077.42	40.7191	48.8218	1127.01	60.1339	66.4073	1053.84	60.0631	65.5872	1077.94	32.367	42.1171	1090.69	26.1891	37.8071	2.2362
91500_5	85.1774	31.3621	15.2889	0.371792	18718.1	2244.16	1150.47	1.79632	6.40965	0.172821	6.10669	-0.37331	5.79047	6.07093	0.075785	4.13015	0.596865	0.0532892	3.90823	1048.86	39.9436	47.7814	1088.63	82.7605	87.1205	1026.96	57.634	63.0938	1046.86	31.9911	41.3325	1050.94	30.9254	40.5793	1.9011
91500_6	80.9533	26.5667	13.1555	0.331462	18014.2	18014.2	1585.6	1.82083	6.11994	0.174888	6.55531	0.30221	5.73429	6.58008	0.0760212	3.87191	0.396114	0.0541839	3.39737	1065.92	35.2707	44.2057	1094.7	77.5203	82.2093	1036.25	62.9872	68.1067	1055.23	40.5077	48.3406	1061.13	38.8402	47.0353	1.79819
91500_7	84.686	31.201	15.0445	0.372604	18620.8	7747.97	9953.44	1.76084	5.27126	0.173752	6.29953	0.201503	5.764	6.30981	0.0738682	2.16288	0.640263	0.0528481	3.816	1040.42	38.6974	46.6265	1037.01	43.681	50.7952	1031.32	60.1373	65.4313	1033.14	33.6986	42.4583	1034.71	21.411	33.5794	0.176793
91500_8	77.7453	28.0924	13.6769	0.364298	16981.9	16981.9	1332.17	1.78886	5.46457	0.172456	6.17477	0.313634	5.80452	6.14364	0.0756963	3.1265	0.186114	0.0533053	3.84627	1049.24	39.3239	47.2699	1086.25	62.6837	68.3133	1024.66	58.2066	63.5941	1044.5	41.455	48.9937	1053.48	39.4191	47.4078	1.89969
91500_9	82.4719	30.39	15.4432	0.371528	18209.5	18209.5	1368.62	1.83508	6.05093	0.174849	6.36823	0.300171	5.7292	6.12078	0.0765713	4.23776	0.223118	0.0559476	3.50041	1099.81	37.4645	46.4713	1109.11	84.6664	89.0911	1037.1	58.6377	64.1141	1060.55	43.5794	51.0111	1062.18	44.0439	51.4297	2.2107
91500_10	77.9337	27.2501	13.1174	0.352592	17604.5	3590.32	2656.73	1.81201	5.39586	0.177601	6.37732	0.330517	5.64207	6.55555	0.0744704	2.68356	0.574959	0.0525698	3.34302	1035.05	33.7301	42.5123	1053.33	54.0693	60.1409	1051.88	63.6288	68.8488	1052.35	35.8572	44.4735	1052.68	26.9322	37.6553	0.0447408
91500_11	79.9571	29.1179	13.8888	0.368042	18170.3	18170.3	1387.05	1.8489	5.59523	0.178411	6.1873	0.0674628	5.61096	6.02231	0.0756031	3.06376	0.498866	0.0519197	3.97317	1022.57	39.6155	47.1478	1083.6	61.4451	67.1518	1057.26	58.7211	64.3956	1065.89	34.4469	43.5507	1070.05	30.2522	40.3835	0.809749
91500_12	80.6658	27.2817	13.3007	0.340656	18121.5	18121.5	1356.19	1.84393	6.24431	0.176885	6.3971	0.291629	5.66518	6.42534	0.0761223	4.43195	0.314057	0.053541	3.70834	1053.65	38.0682	46.2931	1097.33	88.6972	92.8427	1047.92	62.1412	67.4378	1064.07	43.2539	50.7794	1065.97	43.249	50.8002	1.5176
91500_13	91.0194	34.9158	17.2177	0.387793	20876.6	5714.43	6565.17	1.83518	5.97268	0.180238	6.3863	-0.0891212	5.56002	6.69846	0.0742412	2.93835	0.723693	0.0536446	3.91671	1055.57	40.2851	48.159	1047.09	59.2417	64.7675	1066.18	65.82	71.0123	1059.94	32.9022	42.246	1056.08	23.1106	35.088	0.589537
91500_14	83.8664	30.8023	15.3823	0.371329	19217.8	17960.9	81280.3	1.81949	6.45191	0.180325	6.44888	0.0038368	5.55779	6.55923	0.0735137	3.76849	0.599846	0.0545877	3.61443	1073.78	37.7931	46.3567	1027.14	76.2071	80.417	1066.58	64.476	69.7722	1053.71	34.427	43.3493	1048.95	30.9169	40.5406	1.22136
91500_15	85.6354	32.4044	15.6509	0.382431	19687.5	19687.5	1436.54	1.88189	5.90562	0.183089	6.41962	0.432161	5.47348	6.26323	0.0751744	4.00995	0.238941	0.0532864	3.92514	1048.86	40.1173	47.9267	1072.15	80.5538	84.8962	1081.7	62.3681	67.9786	1078.54	43.7191	51.3653	1077.89	42.998	50.7443	0.29348
91500_16	82.7714	32.207	15.5601	0.392749	19382	13811.6	41648.8	1.83751	5.6573	0.184338	6.2564	0.220931	5.43207	6.35163	0.0726834	3.35065	0.360156	0.052876	2.97443	1041	30.1751	39.8476	1004.13	68.0105	72.4955	1089.29	63.6617	69.2416	1061.28	39.6352	47.6959	1048.89	36.2991	44.7797	2.6391
91500_17	81.3687	31.9409	15.639	0.397248	19241.1	4851.74	5112.55	1.8568	6.51888	0.186132	6.18999	0.199481	5.3784	6.15483	0.0728249	4.94989	0.121587	0.0532948	3.53519	1048.86	36.1312	44.6434	1008.04	100.403	103.518	1099.28	62.2063	68.0066	1069.1	49.0179	55.8312	1070.94	48.0341	54.9918	2.82306
91500_18	77.5708	29.7836	14.5984	0.387835	18586.3	3182.14	2292.11	1.93791	5.57873	0.188613	6.62373	0.505418	5.31887	6.66579	0.0750708	3.45451	0.399968	0.0536492	3.98359	1055.76	40.9815	48.7456	1069.47	69.4327	74.4026	1110.59	68.0055	73.4549	1096.78	41.312	49.5833	1090.38	37.2362	46.1477	1.25909
91500_19	86.5452	37.6159	18.6273	0.437676	20898.7	2947.3	1737.48	1.94133	5.49108	0.189371	6.46653	0.499366	5.29358	6.56311	0.0749015	3.59774	0.32075	0.0539661	3.45761	1061.9	35.7721	44.5467	1064.91	72.3558	77.0983	1115.46	67.2238	72.7783	1098.45	42.909	50.9441	1091.6	39.9923	48.4162	1.54808
91500_20	82.8074	36.3619	18.0916	0.44267	20052.1	2598.83	1256.38	1.94389	7.23305	0.191006	6.72531	0.113448	5.25354	6.29557	0.074263	4.74141	0.549438	0.0544047	3.65429	1070.14	38.0853	46.5428	1047.64	95.5895	99.1126	1123.26	64.9018	70.7165	1097.79	36.3287	45.53	1094.61	35.7321	45.0072	2.32015
91500_21	73.95	31.7302	15.5413	0.433262	17656.6	17656.6	1054.5	1.93137	6.07527	0.190674	6.22365	0.0266517	5.25092	6.0381	0.0747769	2.60072	0.742408	0.0535737	3.97706	1054.23	40.8516	48.6156	1061.69	52.3315	58.6777	1123.77	62.2684	68.3128	1102.81	30.0099	40.7519	1089.94	20.2505	33.9493	1.90075
FC1
FC1_1	821.781	522.792	278.141	0.642616	191731	63312.6	79799.1	1.96145	4.87341	0.184363	6.16057	0.150567	5.42943	6.29152	0.0767997	2.70833	0.460127	0.0585865	2.63626	1150.26	29.4738	41.1781	1115.1	54.0522	60.8178	1089.78	63.0862	68.7178	1098.26	37.5123	46.4869	1103.82	30.3512	41.0208	0.772232
FC1_2	898.85	614.649	314.268	0.683346	203526	67207.5	92873.7	1.90615	5.15651	0.180448	6.40431	0.469653	5.55367	6.50958	0.0770911	1.90105	0.769934	0.0565945	2.99236	1112.06	32.3735	42.6727	1122.62	37.9021	47.1619	1067.31	64.0346	69.3714	1085.64	34.6087	43.9818	1103.25	16.0405	31.9064	1.68895
FC1_3	574.802	352.144	184.299	0.617376	135760	33356.4	35489	1.98502	5.75682	0.186748	6.85222	0.514127	5.37496	6.37115	0.0775641	3.0612	0.657707	0.0575657	3.13094	1130.78	34.4322	44.5505	1134.73	60.9213	67.2024	1099.93	64.4241	70.0473	1111.68	33.3103	43.3817	1117.99	26.058	38.2126	1.05687
FC1_4	632.615	390.451	202.52	0.624174	146344	21590	10982.4	1.93061	5.3142	0.183063	6.54415	0.300724	5.47784	6.53515	0.0769569	1.78142	0.849216	0.056826	2.97533	1116.64	32.3187	42.7061	1119.26	35.5273	45.2233	1080.91	65.033	70.4238	1093.7	34.2141	43.7975	1106.29	12.5337	30.3647	1.16966
FC1_5	720.683	446.697	231.092	0.625559	165076	165076	13782.5	1.92804	5.54097	0.181713	6.53456	-0.253897	5.51856	6.64614	0.0773832	1.6788	0.926673	0.0568969	3.05896	1117.98	33.27	43.4519	1130.1	33.439	43.7764	1073.56	65.7244	70.9932	1092.39	34.3201	43.8599	1111.71	8.41481	29.0388	1.72333
FC1_6	949.597	588.902	298.713	0.623507	216560	44166	37061.7	1.91856	5.18137	0.181413	6.39363	0.272078	5.52367	6.40803	0.0771613	1.75213	0.824559	0.0559509	3.00367	1099.81	32.1552	42.3078	1124.43	34.922	44.8304	1072.65	63.3211	68.7654	1089.87	33.8234	43.4328	1106.98	13.2247	30.672	1.57979
FC1_7	706.507	447.868	230.972	0.641087	165048	112598	376378	1.93361	5.27488	0.185231	6.50296	0.423369	5.41275	6.54599	0.076185	1.99841	0.771119	0.0566079	2.95248	1112.44	31.9514	42.3596	1099.17	39.9749	48.5087	1092.87	65.8036	71.2502	1094.97	34.602	44.1209	1096.88	16.758	32.1372	0.192514
FC1_8	645.988	412.525	212.549	0.645314	149509	11757.7	3023.4	1.92813	5.0914	0.183297	6.40808	0.454186	5.46754	6.56561	0.0767853	2.07103	0.746478	0.0565202	2.98658	1110.72	32.2816	42.5812	1114.84	41.3391	49.857	1082.79	65.4455	70.8229	1093.48	34.8524	44.2946	1103.04	17.9685	32.9135	0.978312
FC1_9	697.851	443.925	228.134	0.640923	161720	19389	7468.16	1.93532	5.28267	0.183381	6.38701	0.157619	5.46436	6.47642	0.0770043	2.0521	0.790357	0.0564587	3.12043	1109.57	33.6851	43.6365	1120.29	40.9269	49.5925	1083.37	64.5802	70.0297	1095.7	33.6087	43.3578	1106.57	16.1663	32.0415	1.12593
FC1_10	753.553	483.873	250.117	0.647809	175902	175902	10105	1.94908	5.23435	0.184837	6.66332	0.461256	5.42668	6.43674	0.0769154	1.96933	0.801007	0.0567981	3.06196	1116.07	33.2472	43.4038	1118.22	39.2835	48.2152	1090.29	64.5677	70.0852	1099.65	33.5844	43.4014	1108.09	15.3454	31.6684	0.851304
FC1_11	1054.18	690.281	358.034	0.661405	250939	92399.2	91239	1.95205	5.31301	0.188344	6.50602	0.201308	5.32326	6.50369	0.0756423	2.08165	0.790251	0.0570283	3.41559	1120.47	37.2331	46.5935	1084.66	41.7456	49.7795	1109.74	66.3067	71.8769	1101.3	33.7649	43.5673	1094.1	16.544	31.9666	0.766678
FC1_12	1052.77	695.968	356.759	0.667986	250261	250261	14809.3	1.97211	5.67109	0.188168	6.57707	0.109381	5.33014	6.59609	0.0764544	2.27448	0.797673	0.0562273	3.05786	1105.17	32.8883	42.9537	1105.98	45.4509	53.2004	1108.43	67.1716	72.6629	1107.6	33.5443	43.4966	1106.94	17.2075	32.5872	0.0745793
FC1_13	978.218	647.898	334.044	0.66928	232770	232770	12844.7	1.98823	5.58757	0.187899	6.81406	0.286936	5.34471	6.98884	0.0772246	1.75295	0.92196	0.0564622	3.27257	1109.57	35.3369	44.924	1125.98	34.934	44.864	1105.65	71.0103	76.2004	1112.52	36.6049	45.9727	1119.45	9.20636	29.4615	0.617817
FC1_14	979.209	653.503	338.525	0.674489	238624	238624	10533.5	2.01053	5.04174	0.192769	6.47405	0.558454	5.19894	6.20429	0.0760668	1.91005	0.725434	0.0568225	3.02507	1116.45	32.8564	43.1113	1096.01	38.2321	47.0369	1134.08	64.5168	70.4716	1121.09	33.9019	43.9871	1109.61	17.7139	32.9136	1.15821
FC1_15	785.373	531.416	285.01	0.684019	197990	49924.3	49018.7	2.1138	5.24183	0.198028	6.15841	0.212857	5.05455	6.10035	0.0771678	1.7275	0.453661	0.0584361	3.53909	1147.4	39.4747	48.7963	1124.69	34.4423	44.4618	1163.71	64.9481	71.1663	1150.16	38.0935	47.7274	1136.42	23.1892	36.6728	1.17873
FC1_16	819.72	555.212	295.681	0.683225	208947	208947	12466.4	2.11285	5.83567	0.201067	7.18242	0.643598	5.00328	7.08446	0.0754267	1.70994	0.554542	0.058107	3.31279	1141.1	36.7567	46.5281	1079.08	34.3153	43.6497	1174.62	76.0691	81.5404	1141.5	43.1751	51.754	1105.56	22.195	35.4477	2.90149
FC1_17	816.115	556.345	299.141	0.687689	212474	88408.6	143480	2.20117	5.93242	0.204632	6.54579	0.132686	4.90024	6.40929	0.0784913	3.20053	0.555017	0.0585372	3.13957	1149.31	35.0808	45.3457	1158.41	63.4865	69.7799	1197.16	70.0227	76.1506	1183.42	37.3388	47.6392	1176.64	31.1881	42.8719	1.16036
FC1_18	996.636	696.46	374.078	0.706051	260373	260373	23552.3	2.13991	5.60006	0.205203	6.56616	0.0482287	4.88802	6.87614	0.0760618	1.83662	0.881901	0.0586112	2.95868	1150.64	33.096	43.8501	1095.75	36.7723	45.8544	1199.89	75.2809	81.0373	1163.28	36.887	46.9725	1130.06	12.077	30.7246	3.14654
FC1_19	656.705	465.111	249.9	0.713732	178270	14372.8	7348.53	2.21262	5.2466	0.213179	6.98181	0.763398	4.71188	6.66105	0.0758585	3.29513	0.526888	0.0586256	3.19647	1151.02	35.7583	45.8987	1090.48	66.0098	71.4178	1240.68	75.1759	81.3233	1187	39.6545	49.5286	1160.32	33.3102	44.1706	4.52257
Plesovice
Plesovice_1	1179.39	186.013	29.6936	0.159946	77497.8	77497.8	5215.66	0.392341	5.07029	0.0521763	7.13219	0.916825	19.2701	6.68077	0.0550118	2.54927	0.889403	0.0173799	3.21478	348.095	11.0954	14.101	411.624	56.997	57.9185	326.138	21.2473	22.758	336.869	13.0877	15.5632	349.138	7.55487	11.5439	3.18552
Plesovice_2	959.589	107.168	17.3392	0.110774	65174.8	65174.8	5485.53	0.395704	5.74633	0.0538462	6.86497	0.396795	18.6564	7.12181	0.0536796	2.97118	0.690567	0.0178353	4.04879	357.227	14.337	16.891	356.633	67.0785	67.6684	336.591	23.357	24.8265	339.138	15.8771	17.999	341.124	13.4918	15.9611	0.75093
Plesovice_3	1131.81	181.63	27.767	0.162359	75696.7	36204.4	75602.8	0.384262	5.58173	0.052699	6.36536	-0.135259	19.0123	6.37258	0.053165	2.0078	0.864135	0.0166999	3.07753	334.588	10.2138	13.2019	335.039	45.51	46.2743	330.449	20.5289	22.1288	331.021	13.4082	15.7564	331.825	7.35366	11.0857	0.172612
Plesovice_4	1124.19	179.371	28.2147	0.161326	74806.7	64862.3	215548	0.385922	5.8494	0.0525547	6.62083	-0.186248	19.0896	6.79159	0.0535432	2.02228	0.908565	0.0171562	3.06258	343.726	10.4393	13.5211	350.734	45.6999	46.5335	329.145	21.7944	23.2961	331.835	14.228	16.4699	336.026	6.35857	10.5358	0.810462
Plesovice_5	1107.13	179.415	27.7574	0.163856	74225	8899.02	4397.75	0.398694	5.39465	0.0529236	6.4069	0.0793838	18.9333	6.0774	0.0549532	2.02303	0.783006	0.0168953	3.08793	338.561	10.3677	13.3839	409.183	45.2546	46.3964	331.794	19.653	21.3318	341.64	13.5358	16.0052	354.219	9.32582	12.8604	2.88211
Plesovice_6	1099.77	178.695	27.9908	0.164335	73295.3	14052.5	11410.3	0.386517	5.7608	0.0526379	6.57558	0.152551	18.8089	3.99748	0.053568	2.39927	0.750137	0.0171071	3.22014	342.733	10.9429	13.8983	352	54.2084	54.9181	333.931	13.0074	15.456	336.21	7.75705	11.4377	336.96	7.28322	11.1359	0.677692
Plesovice_7	1198.9	185.244	28.2401	0.156264	80150.3	80150.3	6612.03	0.391366	5.18495	0.0528521	6.37499	0.34252	18.9549	6.26408	0.0539869	2.06029	0.68427	0.0167068	3.5217	334.786	11.694	14.3806	369.619	46.4036	47.3147	331.424	20.2358	21.8664	336.232	14.5449	16.7991	341.951	11.288	14.1599	1.42988
Plesovice_8	1103.47	179.406	28.0551	0.164118	73794.1	73794.1	4153.16	0.394794	5.12797	0.0526325	6.10456	0.294655	19.0131	6.12688	0.0547189	2.25413	0.336854	0.0170919	3.0586	342.336	10.3838	13.4562	399.793	50.5051	51.4845	330.435	19.7356	21.3948	339.21	16.6446	18.6804	343.792	16.3896	18.5065	2.58672
Plesovice_9	1183.39	189.352	30.5105	0.161784	79856.2	26369.8	32523.5	0.392898	5.24998	0.053396	6.54118	0.643274	18.5523	4.09197	0.0537285	2.35513	0.689588	0.0176933	3.33481	354.25	11.7112	14.6829	358.735	53.1508	53.9022	338.431	13.4913	15.9249	341.024	8.6898	12.1737	341.864	8.29223	11.9082	0.760325
Plesovice_10	960.356	100.56	16.0509	0.105726	65612.8	65612.8	3766.91	0.399152	5.63349	0.0539976	6.56198	0.142539	18.5722	6.50188	0.0539462	2.64496	0.673088	0.017481	4.26504	350.08	14.8023	17.1961	367.95	59.5989	60.3046	338.077	21.4153	23.0228	341.898	14.8361	17.1222	344.965	12.6779	15.3331	1.11736
Plesovice_11	1193.83	193.617	29.827	0.164693	79318.7	33003.9	47339.1	0.387543	5.4724	0.0527847	6.57757	0.317645	19.003	6.81216	0.0535835	2.25122	0.768557	0.0168777	3.18788	338.164	10.6909	13.6297	352.422	50.8604	51.6179	330.607	21.9532	23.4576	333.336	15.0089	17.1672	336.757	10.4515	13.4205	0.818565
Plesovice_12	940.263	112.38	17.2367	0.118997	64153.4	64153.4	3937.79	0.388055	5.17428	0.0537717	6.24499	0.0735917	18.6233	6.47182	0.0526511	2.08109	0.673354	0.0169154	4.53218	338.959	15.2335	17.4318	312.72	47.3523	47.9933	337.175	21.2611	22.8711	334.096	15.0861	17.2439	330.388	11.5318	14.1847	0.921359
Plesovice_13	1224.38	199.189	30.2604	0.165255	83747.1	22923.6	19965	0.397779	6.20616	0.0549358	6.49639	-0.360491	18.2514	6.73628	0.0528506	2.73136	0.875984	0.0168417	4.02192	337.369	13.4563	15.8811	321.341	62.0473	62.5652	343.864	22.5558	24.1384	340.977	13.1464	15.6683	338.167	8.08941	11.7009	0.84677
Plesovice_14	1180.73	190.732	29.0292	0.16281	81503.1	22309.3	23911.6	0.400031	5.44772	0.0548253	6.86985	0.585606	18.3243	7.1685	0.053329	2.88667	0.700013	0.0167179	3.18726	334.985	10.5879	13.4996	341.845	65.3529	65.9093	342.532	23.9118	25.3989	342.444	16.117	18.2497	342.37	13.3045	15.82	0.0257921
Plesovice_15	890.925	96.3668	15.0222	0.109353	62585.6	12763.9	13343	0.401119	5.67776	0.055378	6.20375	0.115907	18.0793	6.37055	0.0528394	3.10996	0.366864	0.0170367	4.35555	341.342	14.744	17.0354	320.911	70.6635	71.1174	347.052	21.526	23.2088	343.676	17.4262	19.4291	342.926	17.217	19.2334	0.982318
Plesovice_16	877.723	94.1167	14.327	0.108325	61179.2	61179.2	4431.6	0.405349	5.51484	0.0552354	6.49395	0.346221	18.1511	6.59324	0.0535719	2.86807	0.582042	0.0167198	4.52189	334.985	15.0231	17.1997	352	64.8061	65.4008	345.714	22.1925	23.8161	346.529	15.995	18.1904	347.026	14.7075	17.0757	0.235327
Plesovice_17	1011.41	174.97	27.605	0.175113	73363.7	73363.7	3954.36	0.412974	5.35234	0.0572017	6.50842	0.434807	17.5302	6.8655	0.0526936	2.20934	0.720181	0.0171997	3.32257	344.52	11.3513	14.2491	314.448	50.2494	50.8606	357.626	23.8824	25.5011	351.921	16.3346	18.5533	344.934	11.7139	14.5457	1.62118
Plesovice_18	1004.33	164.426	25.245	0.16604	72211.6	72211.6	5787.24	0.416353	5.32873	0.0567689	6.27663	0.32304	17.6422	6.38354	0.0535135	2.4811	0.527198	0.0167398	3.20839	335.382	10.6703	13.5704	349.467	56.0865	56.7629	355.416	22.0756	23.7967	354.628	16.4519	18.6887	354.042	14.9195	17.3474	0.222448
Plesovice_19	945.675	137.1	21.938	0.143174	70157.5	40398.2	126847	0.431114	5.45013	0.0585635	6.25271	0.217069	17.0979	6.31827	0.0536601	2.7713	0.502332	0.0175944	3.79897	352.264	13.2665	15.9235	355.792	62.5722	63.2013	366.416	22.5045	24.2974	364.97	16.7939	19.1124	364.202	15.8453	18.275	0.396223
Temora II
Temora2_1	181.521	74.6316	14.8294	0.403261	14990.5	1615.65	816.568	0.582891	7.95154	0.065503	6.36455	0.216578	15.2955	6.28803	0.0650185	6.96975	0.121845	0.0225667	6.83945	450.89	30.4948	32.5115	774.037	146.651	147.923	408.254	24.875	26.8874	468.216	33.0093	35.0233	414.988	25.1838	27.2371	12.8067
Temora2_2	318.006	128.221	24.2258	0.398504	25954.6	25954.6	1439.96	0.492047	5.99331	0.0643191	6.31987	0.00647005	15.5742	6.36193	0.0558017	3.32879	0.56493	0.0207373	3.22972	414.704	13.2584	16.8307	443.419	74.0271	74.8525	401.17	24.7445	26.6997	407.483	17.6421	20.3721	409.638	17.076	19.9115	1.54939
Temora2_3	335.63	94.7339	18.2041	0.283822	27032	27032	1755.53	0.493249	6.45813	0.0636003	6.27501	0.0407577	15.7459	6.48474	0.0565406	4.53728	0.347779	0.0211387	3.39425	422.619	14.1947	17.6952	472.641	100.381	101.074	396.928	24.9643	26.8642	408.226	21.8296	24.0974	405.498	21.6874	23.9397	2.76767
Temora2_4	211.495	107.917	20.5181	0.515844	17146.6	17146.6	1503.75	0.484185	6.45524	0.0650105	6.13039	0.476709	15.3949	6.20709	0.055103	5.07655	0.191378	0.0208193	3.26413	416.287	13.4486	17.0051	415.278	113.452	113.926	405.698	24.4057	26.4293	407.133	24.2426	26.2926	406.416	22.6127	24.7905	0.352374
Temora2_5	292.626	103.621	20.8563	0.339756	23523.9	5498.4	5989.98	0.532366	7.44244	0.0642498	6.51532	-0.434121	15.6064	6.63992	0.0603559	4.51393	0.766298	0.023549	8.27494	470.242	38.4631	40.2196	615.533	97.4781	98.6853	400.369	25.7758	27.651	433.82	15.1971	18.6702	440.005	14.8909	18.5133	7.71083
Temora2_6	291.805	154.923	29.5984	0.536294	23971.8	23971.8	2178.65	0.492744	5.51444	0.0648378	6.41919	0.10779	15.457	6.45504	0.0554497	2.49442	0.623564	0.0208982	3.53275	417.871	14.6117	17.9621	429.41	55.5944	56.6214	404.119	25.285	27.2287	407.907	17.7151	20.4406	411.127	15.0388	18.2156	0.9288
Temora2_7	358.08	135.143	25.9237	0.381733	29143	5587.44	4665.63	0.497194	5.61888	0.0642145	6.39191	0.380534	15.6042	6.26304	0.0565356	3.4548	0.299508	0.0209525	3.37717	418.86	13.9993	17.4823	472.641	76.4414	77.3493	400.424	24.3155	26.2956	411.275	20.9014	23.2935	410.766	21.1523	23.5133	2.63846
Temora2_8	325.512	111.832	21.7093	0.348302	26909.5	5681.12	4008.71	0.503585	5.62979	0.0651466	6.28939	0.464782	15.3726	6.32618	0.0563923	3.70254	0.117021	0.0211707	3.57452	423.213	14.9725	18.3335	466.761	82.0116	82.8376	406.269	24.9075	26.8987	415.45	23.683	25.8604	412.257	23.5633	25.7187	2.20978
Temora2_9	244.51	84.2754	15.8223	0.347171	20163	20163	563.764	0.496289	6.03364	0.0647996	6.66887	0.32056	15.485	6.68326	0.0559384	3.86527	0.450212	0.0204815	3.32592	409.558	13.4847	16.9315	448.989	85.8631	86.5937	403.41	26.1337	28.0121	410.26	20.3462	22.7851	410.924	20.3874	22.8294	1.66967
Temora2_10	408.494	134.829	24.4234	0.333751	33694.9	10085.8	8635.09	0.483507	6.62056	0.0651142	6.41033	-0.0533086	15.3904	6.39469	0.0541461	3.96225	0.549298	0.0197424	4.13088	394.903	16.155	18.9328	376.281	89.1434	89.6384	405.813	25.1518	27.1208	401.43	17.7814	20.418	400.792	17.6052	20.2568	1.09179
Temora2_11	532.775	196.515	35.9979	0.369472	43458.3	43458.3	3598.45	0.489216	5.44138	0.0646164	6.50907	0.381235	15.5149	6.24096	0.0552999	3.16136	0.472999	0.0200873	3.33394	401.836	13.2648	16.6396	423.369	70.5368	71.3265	402.658	24.3611	26.359	405.747	18.4053	21.0155	406.682	18.0368	20.7049	0.761347
Temora2_12	339.542	105.774	19.2379	0.313505	28203.6	3989.2	1919.7	0.494337	6.50624	0.0656861	6.40669	-0.401742	15.255	6.58251	0.0547956	3.44426	0.760628	0.0199295	3.53863	398.667	13.9705	17.1613	403.065	77.125	77.7805	409.304	26.1069	28.0406	408.366	15.3004	18.3937	407.881	13.24	16.7116	0.229733
Temora2_13	373.293	108.827	20.3275	0.294531	31580.6	4931.91	3551.72	0.490822	6.59496	0.0668862	6.33543	-0.0397271	14.9755	6.29699	0.0534709	4.26965	0.455604	0.0205232	3.97136	410.35	16.1306	19.1164	347.776	96.5582	96.9489	416.701	25.4095	27.4621	406.326	19.3484	21.8529	406.454	19.2346	21.7537	2.55332
Temora2_14	203.601	67.4607	12.7888	0.336573	17356.2	2249.43	1501.28	0.530063	7.08018	0.0675215	6.4658	-0.343534	14.8452	6.36148	0.0571913	4.17396	0.706539	0.0208934	4.96601	417.673	20.5287	23.0317	497.877	91.9493	92.7879	420.241	25.8788	27.9301	432.428	15.8916	19.2201	434.797	15.5573	18.9785	2.81829
Temora2_15	180.826	60.0173	11.5173	0.33842	16557.3	16557.3	2363.52	0.525037	6.63328	0.0724732	6.79749	0.0836702	13.8549	6.86931	0.0528494	3.71946	0.648839	0.0209673	4.7587	419.256	19.7468	22.3561	321.341	84.4943	84.8753	449.256	29.8086	31.8543	428.959	18.4682	21.356	420.652	17.0598	20.0407	4.73149
Temora2_16	252.798	153.665	29.2815	0.622201	22639.1	5141.37	5430.35	0.550726	6.87438	0.0706892	7.90399	0.258277	14.279	7.83618	0.0568212	2.20078	0.936891	0.0208	4.12479	415.892	16.9801	19.9105	483.561	48.6053	50.0862	436.355	33.0612	34.8145	443.959	20.9481	23.7068	455.705	7.08821	13.4177	1.7127
Temora2_17	275.213	90.547	17.6392	0.331753	24805.5	24805.5	1833.88	0.535586	5.95067	0.0710218	7.02985	0.379573	14.1532	6.95134	0.0551098	3.5248	0.611009	0.0212151	4.82986	424.202	20.2753	22.8813	415.684	78.7649	79.4475	440.102	29.5706	31.5512	436.205	19.6794	22.4989	434.444	18.2998	21.2802	0.893429
Temora2_18	296.027	100.266	19.1211	0.342427	27455.6	27455.6	2324.73	0.56451	6.17685	0.0731046	6.39091	0.169718	13.7046	6.24395	0.0562887	3.84225	0.494049	0.0208575	4.01782	417.079	16.5864	19.5916	462.828	85.1479	85.9305	454.013	27.3733	29.6333	455.47	20.1174	23.1164	455.636	20.0414	23.0523	0.319857
1 Calculated assuming U isotope composition of Hiess et al. (2012)
2 Dates calculated in IsoplotR using Iolite output (isotope ratios)
3 Discordance calculated as [1 –(206Pb/238U date) / (207Pb/235U date)] and given as an absolute value
References
Hiess, J., Condon, D.J., McLean, N. & Noble, S.R., 2012. 238U/235U systematics in terrestrial uranium-bearing minerals. Science 335, 1610–1614.

## Sheet: Details_3Jun2022
Laboratory, sample preparation and imaging details
Laboratory name	Tectonics, Metamorphic Petrology & Orogeny (TeMPO) Laboratory, Johns Hopkins University
Sample type/mineral	Zircon
Sample preparation	Mineral separation used zircon low magnetic susceptibility and high density; annealed for 60–66 h at 900 °C; mounted in 1 inch epoxy round, grains ground to mid section then polished to 0.3 µm SiC paste finish
Imaging type, instrument, conditions	Cathodoluminescence with Deben Centaurus detector on Thermo U3 FIB-SEM; 1.6 nA, 5kV, 10 mm WD
Laser ablation system details
Make, Model and type	Teledyne (Photon Machines) Analyte G2
Ablation cell and volume	HelEx II active two-volume ablation cell
Laser wavelength (nm)	193 nm ArF Excimer
Pulse width	4 ns
Fluence	1.33 J cm-2
Repetition rate	10 Hz
Ablation duration	25 s
Ablation pit depth / ablation rate	25 µm pit depth, measured using an optical microscope, equivalent to 100 nm/pulse
Analytical 'spot' shape and size	Square; 40 µm x 40 µm
Sampling mode / pattern	Static spot ablation
Cell carrier gas flows	0.325 L min-1 He flow into ablation cup; 0.35 L min-1 He flow into ablation cell
Inductively-coupled-plasma mass spectromer (ICP-MS) system details
Make, model, type, analytical mode	Agilent Technologies 8900 triple quadrupole ICP-MS, operating in single quad mode
Sample introduction	1 cm inner diameter PFA tubing with inline Teledyne 'SQUID' smoothing device, 2.5 mm quartz injector; 5 cm sampling depth; Ni cones, high-sensitivity skimmer insert
RF power	1550 W
Make-up gas flow and position	0.80 L min-1 Ar, between cell and torch
Detection system	Single ion-counting SEM
Masses measured (and dwell times)	204,206,207,208 (200 ms); 232,238 (100 ms)
Total integration time	1.0162 s
‘Sensitivity’ as useful yield	0.003%–0.005% U [100 x (#ions detected / #atoms sampled); Schaltegger et al. (2015)]
IC Dead time	41.6 ns
Data processing details
Gas blank	5 s on-peak zero subtracted
Calibration and standardsl strategy	91500 as primary reference material for geochronology, FC1, Plešovice and Temora II to assess accuracy
Common-Pb correction	No common-Pb correction applied
Data processing packages	Iolite v4.6.1 (Paton et al., 2011), using the U-Pb geochronology data reduction scheme (Paton et al., 2010) and a spline fit to the standard data, with an exponential fit to downhole fractionation correction; concordia plots made and final ages calculated in IsoplotR (Vermeesch, 2018)
Uncertainty level and propagation	Ages quoted at 2s absolute, propagation is by addition in quadrature. Reproducibility of primary reference material propagated where appropriate. Excess uncertainty = 2.5%.
Discordance criteria	Discordance reported as the relative difference between the measured 207Pb/235U and 206Pb/238U dates; calculated as |1–(206Pb/238U date)/(207Pb/235U date)| and reported as %
Interpreted age transition	The transition from preferred interpretation of 207Pb/206Pb (for older) to 206Pb/238U (for younger) dates set at 850 Ma
Mass discrimination corrections1	206Pb/238U fractionation error = 1.88%
	207Pb/235U fractionation error = 3.25%
	208Pb/232Th fractionation error = 4.31%
Quality control and validation (materials)	91500 (Wiedenbeck et al., 1995; Schoene et al., 2006); 1063.6 ± 0.3 Ma
	FC-1 (Paces & Miller, 1993): 1099.9 ± 1.1 Ma
	Plešovice (Sláma et al., 2008): 337.13 ± 0.37 Ma
	Temora II (Black et al., 2004): 416.78 ± 0.33 Ma
Quality control and validation (results)	91500 (206Pb/238U): 1061 ± 28 Ma (MSWD=0.011, p(χ2)=1, n=15/15)
	91500 (207Pb/206Pb): 1066 ± 33 Ma (MSWD=0.15, p(χ2)=1, n=15/15)
	FC-1 (206Pb/238U): 1135 ± 29 Ma (MSWD=0.24, p(χ2)=0.24, n=15/15)
	FC-1 (207Pb/206Pb): 1076 ± 27 Ma (MSWD=0.29, p(χ2)=0.99, n=14/15)
	Plešovice (206Pb/238U): 339.6 ± 9.2 Ma (MSWD=0.099, p(χ2)=1, n=15/15)
	Plešovice (207Pb/206Pb): 344 ± 34 Ma (MSWD=1.2, p(χ2)=0.24, n=15/15)
	Temora II (206Pb/238U): 417 ± 11 Ma (MSWD=0.091, p(χ2)=1, n=15/15)
	Temora II (207Pb/206Pb): 405 ± 39 Ma (MSWD=0.82, p(χ2)=0.65, n=15/15)
1Fractionation error calculated in Iolite from primary reference material
References
Black, L.P., Kamo, S.L., Allen, C.M., Davis, D.W., Aleinikoff, J.N., Valley, J.W., Mundil, R., Campbell, I.H., Korsch, R.J., Williams, I.S. & Foudoulis, C., 2004. Improved 206Pb/238U microprobe geochronology by the monitoring of a trace-element-related matrix effect; SHRIMP, ID–TIMS, ELA–ICP–MS and oxygen isotope documentation for a series of zircon standards. Chemical Geology 205, 115–140.
Paces, J.B. & Miller, J.D., 1993. Precise ages of the Duluth Complex and related mafic intrusions, northeastern Minnesota: geochronological insights to physical, petrogenetic, paleomagnetic and tectonomagmatic processes associated with the 1.1 Ga Midcontinent Rift System. Journal of Geophysical Research 98, 13997–14013.
Paton, C., Woodhead, J.D., Hellstrom, J.C., Hergt, J.M., Greig, A. & Maas, R., 2010. Improved laser ablation U–Pb zircon geochronology through robust downhole fractionation correction. Geochemistry Geophysics Geosystems 11, Q0AA06.
Paton, C., Hellstrom, J., Paul, B., Woodhead, J. & Hergt, J., 2011. Iolite: freeware for the visualization and processing of mass spectrometric data. Journal of Analytical Atomic Spectroscopy 26, 2508–2518.
Schaltegger, U., Schmitt, A.K. & Horstwood, M.S.A., 2015. U–Th–Pb zircon geochronology by ID-TIMS, SIMS, and laser ablation ICP-MS: recipes, interpretations, and opportunities. Chemical Geology 402, 89–100.
Schoene, B., Crowley, J.L., Condon, D.J., Schmitz, M.D. & Bowring, S.A., 2006. Reassessing the uranium decay constants for geochronology using ID–TIMS U–Pb data. Geochimica et Cosmochimica Acta 70,426–445.
Sláma, J., Košler, J., Condon, D.J., Crowley, J.L., Gerdes, A., Hanchar, J.M., Horstwood, M.S.A., Morris, G.A., Nasdala, L., Norberg, N., Schaltegger, U., Schoene, B., Tubrett, M.N. & Whitehouse, M.J., 2008. Plešovice zircon – A new natural reference material for U–Pb and Hf isotopic microanalysis. Chemical Geology 249, 1–35.
Vermeesch, P, 2018. IsoplotR: A free and open toolbox for geochronology. Geoscience Frontiers 9, 1479–93.
Wiedenbeck, M., Allé, P., Corfu, F., Griffin, W.L., Meier, M., Oberli, F., von Quadt, A., Roddick, J.C. & Spiegel, W., 1995. Three natural zircon standards for U-Th-Pb, Lu-Hf, trace element and REE analyses. Geostandards and Geoanalytical Research 1, 1–23.

## Sheet: Data_3Jun2022
	Composition							Corrected isotope ratios												Dates (Ma) 2
Sample ID	U	Th	Pb	Th/U	206Pb	206Pb/204Pb	±1s	207Pb/235U 1	±2s	206Pb/238U	±2s	Rho 206Pb/238U	238U/206Pb	±2s	207Pb/206Pb	±2s	Rho 207Pb/206Pb	208Pb/232Th	±2s	208Pb/232Th	±2s	±2s-sys	207Pb/206Pb	±2s	±2s-sys	206Pb/238U	±2s	±2s-sys	207Pb/235U 1	±2s	±2s-sys	Concordia	±2s	±2s-sys	Discordance 3
	ppm	ppm	ppm		cps				(%)		(%)	v 207Pb/235U		(%)		(%)	v 238U/206Pb		(%)		(Ma)	(Ma)		(Ma)	(Ma)		(Ma)	(Ma)		(Ma)	(Ma)		(Ma)	(Ma)	(%)
GH19-02
GH19-02_z1a	1673.26	230.495	23.6503	0.0704306	87592.6	858.546	83.2925	0.651193	6.34671	0.077385	11.4903	0.358206	12.9617	11.3887	0.0609648	5.12589	0.828592	0.0220459	40.0243	440.614	174.442	174.79	636.855	110.301	111.445	479.09	52.5853	53.9321	507.351	30.7341	33.2485	529.427	22.0565	25.723	5.57032
GH19-02_z2a	165.406	62.5963	17.7317	0.37581	10848.1	298.835	37.9247	0.813776	7.33253	0.097397	11.4474	0.0837379	10.3092	11.1361	0.0608888	6.71001	0.299528	0.03059	8.06611	608.716	48.3667	50.7043	634.382	144.445	145.313	596.811	63.4772	65.2071	604.7	50.7931	52.9951	605.039	51.0774	53.27	1.3047
GH19-02_z3a	242.68	132.63	36.7645	0.538531	15886.2	695.853	125.884	0.785956	6.75013	0.0975104	11.2196	-0.0471215	10.2682	11.6809	0.05851	6.15374	0.261671	0.0301254	7.64599	599.697	45.179	47.6016	547.929	134.414	135.111	599.085	66.8259	68.4837	588.51	52.2202	54.2532	586.022	51.2129	53.2673	1.79699
GH19-02_z3b	284.135	98.8084	27.8357	0.34605	18836.2	1063.25	172.557	0.787648	6.39838	0.0997308	11.0638	0.207585	10.0334	11.1092	0.057592	5.70331	-0.116406	0.0307362	8.07188	611.656	48.633	50.9803	513.211	125.302	125.957	612.459	64.906	66.6876	591.77	58.5901	60.429	591.647	56.5408	58.4434	3.49627
GH19-02_z4a	218.018	265.111	217.141	1.20645	44869.7	2123.66	406.974	4.21905	5.82568	0.311782	11.1586	-0.167071	3.20925	11.0769	0.0987047	4.94541	0.51176	0.0891525	7.51599	1725.2	124.284	131.555	1598.87	92.2836	100.568	1748.57	169.643	175.185	1681.52	78.4096	88.9678	1646.6	58.2266	71.3084	3.98733
GH19-02_z5a	100.516	38.2085	11.5421	0.380167	6638.37	220.375	31.8835	0.84549	8.32261	0.100626	11.3242	0.315715	9.96215	11.6429	0.0614236	7.98783	-0.0513272	0.0328823	8.48278	653.556	54.554	56.9482	653.01	171.426	172.201	616.635	68.468	70.182	624.481	67.4183	69.2023	620.827	65.7354	67.5428	1.25643
GH19-02_z5b	129.458	48.854	15.4569	0.375731	9411.67	412.336	73.2433	0.862963	7.0195	0.111315	11.3519	-0.201008	9.01437	12.2613	0.0565535	5.94941	0.573547	0.0349369	8.37912	693.807	57.1472	59.7215	473.033	131.612	132.142	678.17	78.9261	80.7265	632.618	47.5625	50.1231	608.509	41.9283	44.6028	7.20055
GH19-02_z6a	394.825	10.3806	2.38105	0.0261754	21415.2	1334.98	233.858	0.648903	6.52932	0.0835194	11.2392	-0.0435763	11.9955	11.5204	0.0567009	5.57304	0.562813	0.0247289	9.99344	493.518	48.7198	50.2578	478.89	123.169	123.75	516.175	57.145	58.5839	509.361	38.3139	40.3747	505.944	35.2396	37.4408	1.33766
GH19-02_z7a	175.104	71.7623	57.1729	0.408197	32882.4	1097.4	207.083	3.93559	6.02243	0.290222	11.1357	0.233087	3.44649	11.1831	0.0988652	5.10241	0.157878	0.0864087	7.59639	1674.32	122.053	129.031	1602.08	95.1738	103.258	1642.28	162.128	167.246	1624.73	93.4864	101.929	1613.68	75.885	85.9419	1.08015
GH19-02_z7b	233.525	126.294	102.462	0.538074	44447	2034.26	337.552	4.03051	5.84171	0.296009	11.1265	0.424995	3.37929	11.1045	0.0994587	5.08116	0.134294	0.0881111	7.66445	1705.9	125.373	132.428	1613.17	94.6457	102.88	1671.05	163.453	168.708	1645.56	94.2797	102.864	1629.44	76.7028	86.8489	1.54857
GH19-02_z8b	577.627	200.361	52.9677	0.346075	29573.3	2338.67	515.607	0.743125	5.78505	0.0875955	11.129	0.0667236	11.4208	11.2625	0.0622981	5.08887	0.14703	0.0277366	7.71137	552.772	42.0464	44.2591	683.463	108.665	110	541.087	58.4499	59.9948	569.263	50.7947	52.7507	573.464	52.9858	54.8911	4.94951
GH19-02_z9a	265.343	79.9438	35.1828	0.30124	23230.7	1041.69	171.484	1.55001	6.12246	0.150193	11.2108	0.191687	6.66383	11.2834	0.0756761	5.38164	0.402867	0.0463985	8.04889	916.277	72.1036	75.6549	1085.72	107.896	111.258	901.321	94.9067	97.545	956.518	64.1894	68.499	985.793	58.7206	63.6826	5.77062
GH19-02_z9b	95.8458	39.978	18.5869	0.417672	8903.3	403.191	82.0985	1.5819	7.65741	0.159547	11.303	0.00342575	6.28064	11.2163	0.0726373	6.72045	0.300917	0.0493395	8.07067	972.957	76.6664	80.4325	1003.01	136.409	138.695	952.438	99.3086	102.123	967.849	69.9248	73.9928	971.567	68.8777	73.0349	1.59236
GH19-02_z9c	375.922	129.958	57.7333	0.345639	33807.9	520.699	41.8972	1.60895	5.71166	0.154187	11.1276	0.328276	6.48803	11.0414	0.0765158	5.06285	-0.249134	0.0467863	7.63676	923.805	68.9622	72.7267	1107.81	101.168	104.89	924.073	95.0515	97.8186	980.093	83.2532	86.784	1001.21	92.3781	95.7091	5.71578
GH19-02_z10a	68.937	49.408	14.0878	0.708835	3666.79	220.184	53.1592	0.844724	8.44263	0.0911233	11.3502	0.313124	11.0014	11.4506	0.0682027	8.60854	-0.0390304	0.0299255	8.91412	595.775	52.3319	54.4102	873.707	178.287	179.62	560.841	61.5075	63.0853	627.039	68.2654	70.0421	567.645	65.1829	66.7098	10.5573
GH19-02_z10b	28.0139	14.7985	4.35503	0.524623	1476.53	88.0183	11.0789	0.810882	12.0094	0.0898191	11.5686	0.140137	11.1844	11.9291	0.0660747	11.5032	0.156248	0.0295896	9.97689	589.104	57.9263	59.7692	807.653	240.726	241.572	552.047	63.1127	64.6041	604.771	69.3675	70.9961	568.392	62.2497	63.8509	8.71803
GH19-02_z11a	58.909	28.4904	8.72361	0.466164	3183.59	238.793	65.9542	0.731126	8.97876	0.0916378	11.3957	-0.138439	10.9456	11.7417	0.0578264	8.30583	0.405054	0.0325607	9.47378	647.296	60.3528	62.4846	522.341	182.209	182.677	563.583	63.3657	64.9132	555.467	48.376	50.3297	555.761	48.1294	50.0947	1.46106
GH19-02_z11b	57.6578	20.4841	6.07894	0.354992	3019.24	368.364	148.78	0.718565	8.17106	0.0928989	11.6623	0.190501	10.8014	11.61	0.0582311	8.20892	0.231269	0.0266786	30.4615	531.925	159.92	160.472	537.442	179.619	180.121	570.78	63.4185	65.004	564.137	54.4218	56.2196	565.303	53.6305	55.4614	1.17739
GH19-02_z12a	401.732	10.7439	2.82732	0.0266075	18698.5	1091.3	185.503	0.615471	6.39946	0.0800944	11.168	0.293235	12.4919	11.1207	0.0557861	5.5664	0.0327406	0.026247	16.5826	523.462	85.6908	86.6843	443.021	123.78	124.274	496.431	53.1359	54.566	487.027	47.4757	49.0122	487.059	46.7722	48.3312	1.93091
GH19-02_z12b	513.668	15.3535	3.67207	0.0298874	23043.3	1304.27	259.575	0.602326	5.8807	0.0770241	11.1996	0.237713	12.9943	11.1653	0.0567585	5.16271	0.387079	0.0257751	11.3084	514.208	57.4129	58.8345	481.227	114.062	114.695	477.933	51.4312	52.8008	478.502	39.4113	41.1868	478.734	38.1275	39.9618	0.118798
GH19-02_z13a	405.303	5.3724	1.55537	0.0132284	21303.4	1428.06	337.737	0.738685	6.11368	0.0903373	11.1856	0.622369	11.0791	11.2573	0.0593709	5.57413	-0.416325	0.0289436	17.0134	576.346	96.6683	97.7362	579.714	121.094	121.958	557.073	60.0765	61.6697	561.546	62.5116	64.0686	557.791	60.8138	62.3921	0.796597
GH19-02_z13b	345.587	3.98258	1.10548	0.0114765	18108.8	472.911	53.3944	0.734058	6.30721	0.0900025	11.1661	-0.0783117	11.1189	11.2956	0.0590655	5.55478	0.263435	0.0287531	18.77	572.616	105.971	106.934	568.698	120.905	121.738	555.164	60.0869	61.669	557.825	48.0613	50.0437	558.534	47.536	49.5444	0.477021
GH19-02_z13c	432.878	5.79815	1.42801	0.013367	22797.1	2020.39	695.607	0.718768	6.39555	0.0905118	11.2	0.241854	11.058	11.2316	0.0574231	5.56771	0.154533	0.0255282	18.0858	509.284	90.9578	91.8445	506.712	122.472	123.126	558.093	60.0482	61.6478	548.087	49.7247	51.578	546.032	48.8698	50.7406	1.82549
GH19-02_z13d	453.384	5.76777	1.56476	0.0126745	23347.1	2453.07	776.926	0.700345	5.86695	0.0885849	11.1591	0.360537	11.2948	11.2917	0.0571795	5.45122	-0.0492273	0.0295455	11.9492	588.319	69.2846	70.8285	497.491	120.088	120.731	546.875	59.2063	60.7644	537.419	53.3225	54.9891	537.175	52.4218	54.1146	1.75952
GH19-02_z14a	181.279	66.7746	42.8556	0.366611	24141.9	1335.26	201.885	2.72807	6.20525	0.229949	11.2611	0.276066	4.35545	11.3718	0.0856097	5.12527	0.584042	0.0703804	8.07276	1374.01	107.236	112.603	1328.52	99.1992	104.612	1332.39	136.886	140.881	1330.91	69.376	76.9422	1330.07	52.269	61.9494	0.111405
GH19-02_z14b	228.703	96.8008	63.8913	0.423383	30471.8	2343.85	400.901	2.79759	5.92984	0.231172	11.1842	0.467064	4.32984	10.72	0.0879284	5.39649	-0.45047	0.0718292	7.52581	1401.36	101.892	107.747	1380.09	103.698	109.287	1339.5	129.658	133.913	1355.22	104.773	110.115	1367.92	98.7214	104.477	1.15931
GH19-02_z15a	100.736	38.661	21.2091	0.369719	11142.5	329.592	45.1417	2.0284	7.098	0.189236	11.1833	0.210485	5.2884	11.0231	0.0767231	6.86822	0.0385127	0.0599571	8.34183	1176.39	95.3317	99.765	1113.02	137.129	139.923	1116.46	113	116.396	1115.29	86.3733	90.7622	1115.06	85.4032	89.8377	0.104542
GH19-02_z15b	223.484	79.0579	44.2878	0.35428	25797.9	1645.5	296.87	2.14588	5.85182	0.199163	11.1424	-0.254268	5.02226	11.1852	0.0775698	4.96548	0.462742	0.0610415	7.71645	1196.96	89.6747	94.5357	1134.99	98.8118	102.805	1170.56	119.728	123.252	1158.14	68.515	74.3816	1150.53	55.7051	62.6928	1.07196
91500
91500_1	76.3492	28.6099	15.4946	0.374905	12773.9	699.303	175.746	1.8922	8.70355	0.182551	12.1822	0.439673	5.53008	10.8393	0.0757505	9.30242	0.150805	0.0554015	12.0271	1089.29	127.54	130.414	1087.57	186.431	188.403	1071.5	107.001	110.303	1076.81	87.4575	91.5069	1075.92	86.8587	90.9282	0.492878
91500_2	83.494	31.1614	15.25	0.374278	12645.6	2181.69	1736.75	1.85783	6.08477	0.179835	11.4227	0.217891	5.57869	11.3505	0.0749322	6.211	0.176722	0.0532217	11.5847	1047.52	118.262	121.127	1065.72	124.888	127.699	1062.9	111.218	114.348	1063.82	78.6918	83.0645	1064.17	75.482	80.0332	0.0870149
91500_3	80.3226	30.1501	15.5685	0.375389	11053.3	692.417	106.229	1.79708	6.53235	0.178188	11.2946	-0.0257156	5.625	11.2323	0.0739687	7.25398	0.348013	0.0525015	13.9871	1033.7	140.947	143.297	1039.74	146.432	148.721	1054.82	109.292	112.429	1049.92	72.2943	76.9118	1048.88	70.7321	75.4363	0.466776
91500_4	78.8591	29.7999	14.7231	0.376428	10118.9	10118.9	404.299	1.8923	6.54559	0.179368	11.3875	0.466166	5.58889	11.0258	0.0755847	6.11875	0.182206	0.0536571	7.81907	1055.96	80.4445	84.6653	1083.07	122.72	125.671	1061.11	107.876	111.09	1068.32	76.6174	81.139	1070.88	73.9502	78.6471	0.674849
91500_5	79.631	29.703	14.864	0.373786	9173.52	1458.43	864.7	1.83005	6.98876	0.179025	11.2059	0.0132681	5.59129	11.0987	0.0740445	5.96967	0.518403	0.0539184	8.51219	1060.94	87.9769	91.8881	1041.65	120.478	123.26	1060.69	108.55	111.742	1054.48	62.2739	67.624	1051.83	55.7469	61.6376	0.588622
91500_6	79.8715	30.0019	15.1619	0.375358	8336.94	1726.25	1374.08	1.8753	6.91614	0.179292	11.3882	0.403383	5.5944	11.6407	0.0766692	7.02592	0.0429004	0.0539684	7.79971	1061.9	80.6889	84.9439	1111.72	140.311	143.037	1060.14	113.798	116.843	1077.15	88.539	92.5436	1080.54	88.7467	92.7669	1.57867
91500_7	80.6378	30.274	14.8076	0.37612	8297.4	1424.37	520.207	1.84255	5.94808	0.178162	11.2818	0.203075	5.62311	11.3535	0.0756667	5.91143	0.390427	0.053098	7.9337	1045.22	80.8187	84.938	1085.45	118.506	121.573	1055.15	110.511	113.616	1065.07	69.6418	74.5585	1069.56	63.678	69.0641	0.931556
91500_8	81.2851	30.2887	15.7823	0.37312	8303.85	1127.7	566.788	1.85618	6.54959	0.180351	11.1878	0.259105	5.54973	11.344	0.0733616	6.10242	0.0284087	0.054582	8.08659	1073.59	84.5544	88.712	1023	123.489	126.11	1068.01	111.651	114.799	1053.32	83.4339	87.4909	1047.59	80.0105	84.1878	1.39414
91500_9	78.6906	29.736	14.7739	0.377111	7433.95	7433.95	293.833	1.83879	6.8269	0.178123	11.2486	-0.300226	5.62238	11.0006	0.0742895	5.94541	0.645468	0.0532515	8.24582	1048.09	84.2221	88.2039	1048.45	119.85	122.683	1055.28	107.087	110.289	1053.05	55.5921	61.5106	1052.1	47.5337	54.3256	0.211014
91500_10	79.877	29.8243	14.9829	0.372723	7440.92	7440.92	373.863	1.86646	7.40793	0.180378	11.492	-0.0298392	5.56506	11.2153	0.0752711	6.25888	0.550404	0.0540906	8.46995	1064.2	87.8046	91.7468	1074.82	125.682	128.522	1065.29	110.123	113.298	1068.42	61.8813	67.4	1069.65	55.7568	61.8379	0.292866
91500_11	80.8829	30.3289	14.9841	0.375535	7537.8	7537.8	324.198	1.87216	7.52341	0.178803	11.2952	-0.0560214	5.60426	11.3206	0.0760276	6.31498	0.464953	0.0535536	8.31474	1053.85	85.381	89.3535	1094.96	126.426	129.356	1058.42	110.504	113.628	1070.43	66.6707	71.8409	1075.04	61.5776	67.1871	1.12128
91500_12	80.0428	29.9172	14.981	0.373724	7641.25	7641.25	204.605	1.82411	6.38158	0.177909	11.3694	0.540013	5.63623	11.2536	0.0741512	6.27399	-0.197985	0.053647	8.15181	1055.76	83.8556	87.9114	1044.65	126.555	129.222	1052.88	109.321	112.445	1050.21	91.1465	94.8526	1049.5	89.9448	93.6935	0.254847
91500_13	79.7089	30.1684	15.029	0.378824	7977.57	7977.57	296.121	1.87035	6.96319	0.17901	11.3397	0.119784	5.59993	11.4087	0.0756731	6.28441	0.283853	0.0541086	8.42676	1064.58	87.3895	91.3524	1085.45	125.984	128.873	1059.18	111.436	114.539	1067.8	75.0204	79.6284	1071.06	71.3384	76.1981	0.807369
91500_14	80.1942	30.0314	15.0819	0.375115	8421.31	2137.05	1534.62	1.88141	7.15447	0.180636	11.2388	0.392922	5.54369	11.2485	0.0754359	6.65698	-0.0327919	0.0536182	7.94251	1055.19	81.6624	85.8175	1079.35	133.584	136.282	1069.08	110.818	113.995	1072.46	87.8009	91.8033	1073.22	87.1208	91.1587	0.31542
91500_15	79.9255	29.9149	14.9557	0.374591	8422.84	8422.84	353.836	1.83213	6.91537	0.178179	11.2746	0.146714	5.62305	11.5077	0.074013	6.4674	0.178169	0.0537889	8.27318	1058.45	85.3111	89.3206	1040.83	130.523	133.092	1055.16	112.011	115.075	1050.5	79.5577	83.7804	1048.91	76.6928	81.0519	0.44336
FC1
FC1_1	695.897	406.746	206.528	0.585301	122812	1927.88	678.077	2.06343	6.01064	0.196942	11.2375	0.312402	5.04831	7.35632	0.0760632	5.76108	0.297481	0.0504542	7.53404	994.316	73.0981	77.2091	1095.75	115.321	118.53	1165.03	78.4018	83.637	1141.06	54.0007	61.0723	1140.07	53.4939	60.6131	2.10115
FC1_2	733.598	423.778	216.062	0.579723	121247	23193.7	16063.5	2.05519	5.75089	0.200812	11.2864	0.0157328	4.98226	11.204	0.0738958	5.00381	0.817213	0.0539862	7.70815	1062.28	79.7652	84.07	1037.83	101.041	104.32	1179.14	120.733	124.28	1130.36	52.3445	59.4855	1103.04	32.7333	42.8008	4.31548
FC1_3	716.535	410.367	213.324	0.572563	101995	6243.38	2307.65	2.00516	5.69385	0.189128	11.0807	0.00588958	5.28928	11.1553	0.0763188	5.17761	0.302999	0.0559976	7.47244	1100.77	80.049	84.6472	1102.58	103.546	107.152	1116.29	114.337	117.694	1111.65	72.8438	77.9652	1108.92	63.8982	69.653	0.417659
FC1_4	773.647	452.891	239.623	0.582598	103414	16026.1	8456.08	2.0272	6.00041	0.195399	11.2005	-0.0703174	5.12127	11.125	0.0753783	5.28218	0.466858	0.0581552	7.70059	1142.05	85.5096	90.1503	1077.75	106.017	109.387	1149.83	117.159	120.634	1125.13	66.9134	72.5851	1111.6	56.6403	63.0904	2.19538
FC1_5	802.326	483.54	262.532	0.599493	102041	6913.1	2016.26	2.03383	5.63734	0.202357	11.254	0.434291	4.94506	11.1313	0.0735717	4.97397	0.550432	0.0584768	7.515	1148.16	83.8781	88.6536	1028.79	100.573	103.81	1187.25	120.697	124.293	1132.42	63.9125	69.9021	1100.33	50.7543	57.7295	4.84115
FC1_6	775.465	458.132	242.104	0.591646	85662.7	7065.63	2065.56	1.97832	6.01899	0.188567	11.1968	0.296753	5.30748	11.4028	0.0760078	5.25723	0.354973	0.0564244	7.62234	1108.8	82.2357	86.782	1094.43	105.253	108.751	1112.77	116.542	119.816	1106.58	72.3047	77.4164	1102.93	62.5162	68.3269	0.559512
FC1_7	769.18	460.456	241.293	0.599846	83706.7	15762.8	6763.24	2.01281	5.80994	0.188189	11.1616	0.219683	5.29222	14.927	0.0764891	5.11796	0.431749	0.0570695	7.60884	1121.23	82.9901	87.5962	1107.03	102.279	105.957	1115.72	152.928	155.451	1112.78	91.459	95.5963	1110.19	64.8026	70.4961	0.264681
FC1_8	790.336	479.748	255.548	0.608091	83674.1	10234.6	3885.35	2.03512	6.17336	0.191227	11.1955	0.266028	5.23204	11.1968	0.0754432	5.00113	0.109734	0.0561691	7.60052	1104.02	81.665	86.2031	1079.35	100.353	103.918	1127.49	115.822	119.202	1111.16	79.3766	84.0971	1100.42	70.6226	75.7917	1.4697
FC1_9	804.375	485.032	256.992	0.602965	78887.5	23878.7	25117.4	1.98035	6.16667	0.189546	11.2328	-0.122608	5.28031	11.2953	0.0753968	4.91426	0.588512	0.0570035	7.58087	1119.89	82.5888	87.2053	1078.28	98.6231	102.241	1118.03	115.937	119.259	1104.61	62.5798	68.402	1096.25	48.0229	55.2929	1.21479
FC1_10	842.936	518.961	269.446	0.615937	79805.1	13441.4	7382.27	1.90087	5.78277	0.184084	11.2067	0.61215	5.43812	11.0911	0.0755014	4.9498	0.130836	0.055834	7.5043	1097.52	80.1607	84.7265	1080.94	99.3061	102.917	1088.18	111.053	114.336	1085.77	76.9484	81.5958	1084.2	68.8868	74.0275	0.221726
FC1_11	838.695	516.217	281.87	0.615876	84739.3	12484.8	5409.09	1.97651	5.56547	0.193183	11.1793	0.322432	5.17999	11.0804	0.0744363	4.88924	0.111364	0.0593104	7.62958	1164	86.3027	91.0766	1052.51	98.5011	101.955	1137.88	115.577	119.026	1108.9	78.2794	83.0434	1089.43	69.1046	74.2781	2.61296
FC1_12	814.215	495.547	262.997	0.608561	84213.5	84213.5	585.133	1.97394	5.82888	0.191617	11.147	-0.0650497	5.22064	11.1894	0.0744105	4.99401	0.217082	0.0570702	7.51689	1121.23	81.9867	86.6461	1051.7	100.629	104.007	1129.75	115.951	119.341	1103.37	75.4893	80.3711	1086.49	66.0278	71.3965	2.39146
FC1_13	828.972	494.623	260.011	0.599966	88438.2	15210.5	6612.53	1.95492	5.60723	0.18911	11.1371	0.645572	5.29047	11.1294	0.0748993	4.90892	-0.0805157	0.0558554	7.51883	1098.09	80.3618	84.9214	1064.91	98.7201	102.247	1116.06	114.049	117.412	1098.85	84.0495	88.425	1086.59	76.0886	80.7924	1.56642
FC1_14	787.273	460.734	242.036	0.586822	86988.6	86988.6	2383.07	2.01697	5.97746	0.189019	11.1769	-0.105705	5.29423	11.1031	0.0771148	5.01759	0.404477	0.0564896	7.46065	1110.14	80.5931	85.238	1123.14	100.041	103.907	1115.33	113.715	117.083	1117.98	68.9123	74.3645	1119.59	58.1233	64.5116	0.237127
FC1_15	716.471	429.525	223.713	0.600265	82141.1	6222.32	1317.46	2.1541	5.76779	0.192695	11.2016	0.358042	5.19349	11.3515	0.0799473	4.98007	0.549107	0.0561913	7.72471	1104.41	83.0253	87.4958	1194.87	98.2466	102.687	1135.17	118.156	121.516	1155.86	66.0425	72.0876	1168.8	51.3137	59.05	1.7902
Plesovice
Plesovice_1	689.109	68.2891	11.0834	0.099188	34279.3	1168.07	398.59	0.432639	9.40595	0.0543645	11.1682	0.232468	18.4084	10.8218	0.0575524	9.25609	-0.0740299	0.0167098	9.50542	334.786	31.5592	32.6502	511.684	203.419	203.821	341.007	35.9447	36.9418	363.786	45.1042	46.012	340.969	36.4898	37.4722	6.26148
Plesovice_2	628.673	54.7197	10.1177	0.0872446	28979.9	4772.41	3091.09	0.393858	6.87652	0.0549434	11.1786	-0.0111255	18.2177	11.0303	0.0518342	6.47922	0.221825	0.0177976	16.3099	356.433	57.6244	58.3093	276.887	148.376	148.538	344.485	36.9993	37.9884	335.901	32.8497	33.9061	337.163	32.3782	33.4574	2.55549
Plesovice_3	606.33	53.5246	8.31517	0.0867136	25265.3	1953.06	379.576	0.385315	6.46803	0.0543906	11.1577	-0.144873	18.3965	11.2506	0.0509494	5.97582	0.434387	0.0173831	9.18581	348.095	31.7021	32.8748	237.531	137.833	137.961	341.222	37.3925	38.3533	328.283	28.5896	29.7442	325.367	28.0146	29.1716	3.94151
Plesovice_4	598.327	52.748	9.29622	0.0877435	22896.2	6113.76	6016.04	0.397149	6.11635	0.0548381	11.2749	0.445725	18.269	11.2099	0.0526246	5.89368	0.119209	0.0181477	13.7429	363.379	49.4927	50.3195	311.423	134.147	134.372	343.541	37.5028	38.4737	339.437	34.7015	35.7241	340.238	34.2837	35.3232	1.20909
Plesovice_5	619.207	54.7988	9.3707	0.0881116	21830.4	2768.63	1143.42	0.395901	6.07305	0.0554299	11.1667	-0.00269431	18.0524	11.2894	0.0522606	5.63691	0.344386	0.0185023	9.17279	370.322	33.6602	34.9102	295.776	128.657	128.869	347.554	38.1965	39.1723	340.901	31.1056	32.252	339.669	30.7199	31.872	1.9518
Plesovice_6	630.123	56.2733	9.40236	0.0893674	19095.1	2958.17	1350.53	0.392048	5.93855	0.0519269	11.1943	0.289255	19.2754	11.1679	0.0551025	5.47944	0.284596	0.0178199	8.93982	356.83	31.6205	32.8548	415.278	122.435	122.874	326.051	35.5078	36.4314	337.259	31.4246	32.536	336.855	31.9425	33.034	3.32339
Plesovice_7	653.17	58.3409	10.0277	0.0894729	20266.9	2272.75	714.535	0.396717	6.34938	0.0536204	11.159	0.209481	18.6581	11.326	0.0532282	5.78633	0.229359	0.0183228	9.23882	366.752	33.5785	34.8078	337.594	131.076	131.348	336.561	37.1409	38.082	336.691	32.8852	33.9454	336.685	32.8776	33.938	0.0388264
Plesovice_8	678.054	62.7993	10.4936	0.0926888	20563.5	6117.08	3774.01	0.405876	6.70504	0.0543568	11.3514	0.257119	18.2851	8.5336	0.0537387	6.35096	0.273529	0.0174245	8.80062	348.889	30.4421	31.667	359.155	143.327	143.608	343.247	28.5265	29.7893	345.303	26.7501	28.1085	344.527	25.7373	27.1403	0.595196
Plesovice_9	718.601	69.6498	11.7105	0.0966718	20578.4	15942.4	24188.4	0.398898	6.68553	0.0552986	11.2236	-0.0457188	18.1077	11.093	0.0528052	6.06991	0.278802	0.0161738	16.9549	324.054	54.505	55.1038	319.62	137.95	138.182	346.522	37.4248	38.4144	343.053	32.201	33.3235	343.161	32.0692	33.1969	1.01117
Plesovice_10	669.014	62.2981	9.67965	0.0927987	18665.8	13236.3	25967.2	0.400953	6.67169	0.0543311	11.2352	0.0601853	18.4312	11.4738	0.0539517	5.87509	0.282151	0.0173625	9.55502	347.698	32.9383	34.0659	367.95	132.379	132.699	340.597	38.0657	39.0064	344.116	33.038	34.1397	344.102	33.186	34.2828	1.02269
Plesovice_11	643.12	59.0323	9.39106	0.0919052	18154	18154	531.272	0.386331	6.35008	0.0540188	11.1956	-0.0341726	18.5287	11.1916	0.051948	5.4347	0.470828	0.017374	8.83075	347.896	30.4597	31.6771	282.181	124.349	124.549	338.851	36.9448	37.9035	331.743	27.9469	29.1515	329.219	27.0637	28.2876	2.14288
Plesovice_12	647.527	59.4903	8.5784	0.0918115	18359.2	18359.2	447.122	0.371586	6.21209	0.0527578	11.3026	0.256508	18.9928	11.5776	0.0508837	5.64375	0.333918	0.0154775	7.8002	310.331	24.0209	25.2427	234.359	130.251	130.382	330.779	37.3316	38.2366	319.061	30.2744	31.3075	316.425	29.6833	30.7194	3.67265
Plesovice_13	587.773	52.1754	8.34559	0.0888941	17669.5	14048.9	36359.8	0.402901	6.26738	0.0536611	11.2677	0.518864	18.6623	11.4689	0.0545171	6.06303	-0.246829	0.016844	8.36737	337.369	27.9933	29.2363	391.582	136.049	136.4	336.487	37.6018	38.5313	343.547	41.489	42.3686	336.071	38.1262	39.0409	2.055
Plesovice_14	579.745	50.3788	7.95408	0.0870142	18194.9	18194.9	529.656	0.410256	6.51299	0.0538288	11.2484	0.325258	18.6054	11.4191	0.0551832	5.8972	0.161513	0.0169639	8.73575	339.753	29.4327	30.6337	418.519	131.701	132.116	337.491	37.5467	38.483	347.969	35.2815	36.3382	345.124	35.5895	36.6204	3.01121
Plesovice_15	591.408	52.0289	7.95439	0.0881446	18907.1	6233.53	5317.81	0.421374	6.24867	0.0539278	11.1653	-0.188664	18.5568	11.1018	0.0561341	5.54215	0.280162	0.0163821	8.63692	328.228	28.12	29.2928	456.517	122.958	123.487	338.352	36.595	37.5599	353.809	32.6566	33.8332	352.534	33.3941	34.5375	4.3688
Temora II
Temora2_1	80.5931	29.6676	4.80537	0.36884	4837.91	2683.19	3757.29	0.477756	8.20732	0.0671323	11.3123	0.0703365	14.9313	11.1873	0.0520926	7.88553	0.231943	0.0167175	9.44631	334.985	31.3818	32.48	288.335	180.227	180.371	417.895	45.2669	46.4568	398.62	39.8922	41.1181	402.814	38.6646	39.9545	4.83549
Temora2_2	152.726	75.8851	14.1547	0.500737	8458.71	778.092	252.618	0.497886	7.63213	0.0665	11.2471	0.196886	15.061	11.491	0.0542158	7.75833	0.0455446	0.0195855	8.77786	391.931	34.0721	35.453	379.187	174.463	174.72	414.41	46.1215	47.2708	409.092	45.6884	46.8191	411.57	43.5041	44.7043	1.3
Temora2_3	149.688	81.7461	15.7846	0.545396	7652.91	919.022	437.19	0.486961	9.28398	0.0660552	11.2188	0.263629	15.1557	11.0209	0.0524004	9.24039	-0.064915	0.0208139	7.97781	416.089	32.8561	34.4635	301.879	210.66	210.795	411.901	43.9757	45.1653	395.667	48.6103	49.6065	407.056	42.4838	43.6856	4.10293
Temora2_4	139.735	44.1263	8.49487	0.314163	6658.17	3951.84	10048.3	0.497165	8.30196	0.0687665	11.2055	0.230106	14.5521	11.2164	0.05243	7.57679	-0.0342464	0.0217291	10.5889	434.288	45.496	46.7736	303.184	172.705	172.872	428.43	46.4908	47.7086	409.362	46.3197	47.4368	418.119	43.3383	44.581	4.65818
Temora2_5	87.8028	34.6906	7.25237	0.392787	3875.46	1263.36	1338.17	0.538408	8.1433	0.0697615	11.558	0.282385	14.4028	10.8012	0.0566531	7.80817	0.0790885	0.0223927	9.41397	447.334	41.6492	43.1245	476.94	172.623	173.034	432.726	45.2045	46.481	439.791	45.7493	47.0519	435.983	43.4112	44.7586	1.60647
Temora2_6	269.017	115.894	22.711	0.432188	10434.3	10434.3	444.433	0.511886	7.98809	0.0665847	11.1683	0.252755	15.0275	11.1186	0.0561406	7.98788	-0.125096	0.0211383	8.9809	422.619	37.5612	39.0189	456.912	177.214	177.582	415.305	44.7217	45.9111	421.714	49.9699	51.07	416.31	44.8163	46.0089	1.5198
Temora2_7	306.863	176.033	34.1254	0.575269	11828.3	2180.44	1000.84	0.507228	6.8593	0.0668893	11.236	0.456962	14.9701	11.7322	0.0545594	6.41945	-0.0111689	0.0209762	7.74904	419.454	32.1683	33.8344	393.228	143.995	144.33	416.847	47.3568	48.4899	413.252	45.6143	46.7696	414.476	44.6308	45.8178	0.869808
Temora2_8	251.676	133.736	25.6623	0.53491	9380.95	1814.15	906.686	0.525827	7.76403	0.0670999	11.1606	0.276009	14.9113	11.1005	0.0562939	7.02953	-0.125839	0.0201061	8.2317	402.232	32.7842	34.2918	462.828	155.802	156.231	418.438	44.9713	46.1719	425.326	48.1825	49.3418	420.032	45.0282	46.2364	1.61942
Temora2_9	258.179	152.34	28.2046	0.588865	8867.16	8867.16	354.563	0.504896	7.01885	0.0660005	11.1761	-0.189368	15.1657	11.2175	0.0556542	6.33806	0.331741	0.0199635	7.99312	399.261	31.5996	33.1386	437.43	141.085	141.508	411.639	44.7302	45.8988	415.566	37.1744	38.5989	415.616	37.3112	38.7309	0.945058
Temora2_10	268.834	155.652	28.7059	0.578905	8935.79	8935.79	370.202	0.480705	7.43673	0.0648416	11.2184	0.0520651	15.4383	11.3333	0.0542179	6.82105	0.231143	0.0199959	7.90074	400.053	31.2973	32.8565	379.187	153.391	153.684	404.594	44.4434	45.5799	400.83	39.0768	40.3412	401.364	38.7487	40.0268	0.93913
Temora2_11	285.154	138.381	26.6836	0.47947	10024	10024	543.996	0.49729	6.28748	0.0673989	11.2239	0.329353	14.8553	11.3955	0.0536346	5.80228	0.167513	0.0212188	7.93696	424.202	33.3179	34.9649	354.529	131.045	131.344	419.965	46.3295	47.5042	410.039	40.1093	41.3985	409.596	39.5916	40.8944	2.42077
Temora2_12	191.591	68.7975	13.1537	0.358638	6820.28	6820.28	333.59	0.482784	6.84996	0.0662499	11.1976	-0.101002	15.1085	11.1339	0.0526468	6.5572	0.36823	0.021552	12.0462	430.729	51.3364	52.4536	312.72	149.202	149.406	413.147	44.5567	45.7382	398.255	35.0497	36.4364	397.049	34.6323	36.0268	3.73921
Temora2_13	221.777	77.8131	14.9868	0.35162	8288.22	1932.99	1437.54	0.524212	7.36304	0.0665175	11.1814	0.436413	15.0436	11.0217	0.057217	7.20616	-0.345305	0.0203788	8.75889	407.578	35.342	36.7816	499.032	158.71	159.2	414.873	44.287	45.4853	427.956	52.7599	53.8338	411.249	44.6124	45.7817	3.0571
Temora2_14	176.836	61.4586	11.7242	0.34901	6803.01	6803.01	314.882	0.513913	7.23461	0.0661431	11.2582	0.0963849	15.1439	11.4367	0.0561316	6.21039	0.352413	0.0205698	8.27501	411.339	33.6941	35.2285	456.517	137.779	138.251	412.212	45.669	46.8173	418.996	37.499	38.9346	419.489	37.6919	39.1237	1.61919
Temora2_15	311.258	101.125	18.8201	0.325125	12345	2903.3	1342.38	0.528716	6.36458	0.0670976	11.2602	0.403683	14.9258	11.2016	0.0566457	5.71089	0.167253	0.0201783	7.91831	403.618	31.6413	33.2113	476.94	126.262	126.823	418.044	45.3432	46.532	427.206	40.7718	42.1475	426.329	41.3037	42.6567	2.14471
1 Calculated assuming U isotope composition of Hiess et al. (2012)
2 Dates calculated in IsoplotR using Iolite output (isotope ratios)
3 Discordance calculated as [1 –(206Pb/238U date) / (207Pb/235U date)] and given as an absolute value
References
Hiess, J., Condon, D.J., McLean, N. & Noble, S.R., 2012. 238U/235U systematics in terrestrial uranium-bearing minerals. Science 335, 1610–1614.

## Sheet: Details_22Nov2023
Laboratory, sample preparation and imaging details
Laboratory name	Tectonics, Metamorphic Petrology & Orogeny (TeMPO) Laboratory, Johns Hopkins University
Sample type/mineral	Zircon
Sample preparation	Mineral separation used zircon low magnetic susceptibility and high density; annealed for 60–66 h at 900 °C; mounted in 1 inch epoxy round, grains ground to mid section then polished to 0.3 µm SiC paste finish
Imaging type, instrument, conditions	Cathodoluminescence with Deben Centaurus detector on Thermo U3 FIB-SEM; 1.6 nA, 5kV, 10 mm WD
Laser ablation system details
Make, Model and type	Teledyne (Photon Machines) Analyte G2
Ablation cell and volume	HelEx II active two-volume ablation cell
Laser wavelength (nm)	193 nm ArF Excimer
Pulse width	4 ns
Fluence	4.0 J cm-2
Repetition rate	8 Hz
Ablation duration	25 s
Ablation pit depth / ablation rate	20 µm pit depth, measured using an optical microscope, equivalent to 100 nm/pulse
Analytical 'spot' shape and size	Square; 25 µm x 25 µm
Sampling mode / pattern	Static spot ablation
Cell carrier gas flows	0.3 L min-1 He flow into ablation cup; 0.5 L min-1 He flow into ablation cell
Inductively-coupled-plasma mass spectromer (ICP-MS) system details
Make, model, type, analytical mode	Agilent Technologies 8900 triple quadrupole ICP-MS, operating in single quad mode
Sample introduction	1 cm inner diameter PFA tubing with inline Teledyne 'SQUID' smoothing device, 2.5 mm quartz injector; 5 cm sampling depth; Ni cones, high-sensitivity skimmer insert
RF power	1550 W
Make-up gas flow and position	0.80 L min-1 Ar, between cell and torch
Detection system	Single ion-counting SEM
Masses measured (and dwell times)	29,47,88,89,91,93,139,140,153,157,172,175 (10 ms); 204,206,207,208 (200 ms); 232,238 (100 ms)
Total integration time	1.1338 s
‘Sensitivity’ as useful yield	0.003%–0.005% U [100 x (#ions detected / #atoms sampled); Schaltegger et al. (2015)]
IC Dead time	41.6 ns
Data processing details
Gas blank	15 s on-peak zero subtracted
Calibration and standardsl strategy	91500 as primary reference material for geochronology, FC1, Plešovice and Temora II to assess accuracy; NIST612 as primary reference material for geochemistry
Common-Pb correction	No common-Pb correction applied
Data processing packages	Iolite v4.6.1 (Paton et al., 2011), using the U-Pb geochronology data reduction scheme (Paton et al., 2010) and a mean–median fit to the standard data, with an exponential fit to downhole fractionation correction; concordia plots made and final ages calculated in IsoplotR (Vermeesch, 2018)
Uncertainty level and propagation	Ages quoted at 2s absolute, propagation is by addition in quadrature. Reproducibility of primary reference material propagated where appropriate. Excess uncertainty = 2.5%.
Discordance criteria	Discordance reported as the relative difference between the measured 207Pb/235U and 206Pb/238U dates; calculated as |1–(206Pb/238U date)/(207Pb/235U date)| and reported as %
Interpreted age transition	The transition from preferred interpretation of 207Pb/206Pb (for older) to 206Pb/238U (for younger) dates set at 850 Ma
Mass discrimination corrections1	206Pb/238U fractionation error = 1.53%
	207Pb/235U fractionation error = 3.16%
	208Pb/232Th fractionation error = 3.85%
Quality control and validation (materials)	91500 (Wiedenbeck et al., 1995; Schoene et al., 2006); 1063.6 ± 0.3 Ma
	FC-1 (Paces & Miller, 1993): 1099.9 ± 1.1 Ma
	Plešovice (Sláma et al., 2008): 337.13 ± 0.37 Ma
	Temora II (Black et al., 2004): 416.78 ± 0.33 Ma
Quality control and validation (results)	91500 (206Pb/238U): 1061 ± 16 Ma (MSWD=0.67, p(χ2)=0.73, n=10/10)
	91500 (207Pb/206Pb): 1066 ± 40 Ma (MSWD=0.54, p(χ2)=0.84, n=10/10)
	FC-1 (206Pb/238U): 1122 ± 17 Ma (MSWD=1.2, p(χ2)=0.3, n=10/10)
	FC-1 (207Pb/206Pb): 1075 ± 32 Ma (MSWD=0.28, p(χ2)=0.98, n=10/10)
	Plešovice (206Pb/238U): 330.5 ± 5.2 Ma (MSWD=0.78, p(χ2)=0.63, n=10/10)
	Plešovice (207Pb/206Pb): 313 ± 42 Ma (MSWD=0.11, p(χ2)=1, n=10/10)
	Temora II (206Pb/238U): 416.7 ± 6.7 Ma (MSWD=0.56, p(χ2)=0.83, n=10/10)
	Temora II (207Pb/206Pb): 385 ± 46 Ma (MSWD=0.3, p(χ2)=0.97, n=10/10)
1Fractionation error calculated in Iolite from primary reference material
References
Black, L.P., Kamo, S.L., Allen, C.M., Davis, D.W., Aleinikoff, J.N., Valley, J.W., Mundil, R., Campbell, I.H., Korsch, R.J., Williams, I.S. & Foudoulis, C., 2004. Improved 206Pb/238U microprobe geochronology by the monitoring of a trace-element-related matrix effect; SHRIMP, ID–TIMS, ELA–ICP–MS and oxygen isotope documentation for a series of zircon standards. Chemical Geology 205, 115–140.
Paces, J.B. & Miller, J.D., 1993. Precise ages of the Duluth Complex and related mafic intrusions, northeastern Minnesota: geochronological insights to physical, petrogenetic, paleomagnetic and tectonomagmatic processes associated with the 1.1 Ga Midcontinent Rift System. Journal of Geophysical Research 98, 13997–14013.
Paton, C., Woodhead, J.D., Hellstrom, J.C., Hergt, J.M., Greig, A. & Maas, R., 2010. Improved laser ablation U–Pb zircon geochronology through robust downhole fractionation correction. Geochemistry Geophysics Geosystems 11, Q0AA06.
Paton, C., Hellstrom, J., Paul, B., Woodhead, J. & Hergt, J., 2011. Iolite: freeware for the visualization and processing of mass spectrometric data. Journal of Analytical Atomic Spectroscopy 26, 2508–2518.
Schaltegger, U., Schmitt, A.K. & Horstwood, M.S.A., 2015. U–Th–Pb zircon geochronology by ID-TIMS, SIMS, and laser ablation ICP-MS: recipes, interpretations, and opportunities. Chemical Geology 402, 89–100.
Schoene, B., Crowley, J.L., Condon, D.J., Schmitz, M.D. & Bowring, S.A., 2006. Reassessing the uranium decay constants for geochronology using ID–TIMS U–Pb data. Geochimica et Cosmochimica Acta 70,426–445.
Sláma, J., Košler, J., Condon, D.J., Crowley, J.L., Gerdes, A., Hanchar, J.M., Horstwood, M.S.A., Morris, G.A., Nasdala, L., Norberg, N., Schaltegger, U., Schoene, B., Tubrett, M.N. & Whitehouse, M.J., 2008. Plešovice zircon – A new natural reference material for U–Pb and Hf isotopic microanalysis. Chemical Geology 249, 1–35.
Vermeesch, P, 2018. IsoplotR: A free and open toolbox for geochronology. Geoscience Frontiers 9, 1479–93.
Wiedenbeck, M., Allé, P., Corfu, F., Griffin, W.L., Meier, M., Oberli, F., von Quadt, A., Roddick, J.C. & Spiegel, W., 1995. Three natural zircon standards for U-Th-Pb, Lu-Hf, trace element and REE analyses. Geostandards and Geoanalytical Research 1, 1–23.

## Sheet: Data_22Nov2023
	Composition							Corrected isotope ratios												Dates (Ma) 2
Sample ID	U	Th	Pb	Th/U	206Pb	206Pb/204Pb	±1s	207Pb/235U 1	±2s	206Pb/238U	±2s	Rho 206Pb/238U	238U/206Pb	±2s	207Pb/206Pb	±2s	Rho 207Pb/206Pb	208Pb/232Th	±2s	208Pb/232Th	±2s	±2s-sys	207Pb/206Pb	±2s	±2s-sys	206Pb/238U	±2s	±2s-sys	207Pb/235U 1	±2s	±2s-sys	Concordia	±2s	±2s-sys	Discordance 3
	ppm	ppm	ppm		cps				(%)		(%)	v 207Pb/235U		(%)		(%)	v 238U/206Pb		(%)		(Ma)	(Ma)		(Ma)	(Ma)		(Ma)	(Ma)		(Ma)	(Ma)		(Ma)	(Ma)	(%)
MD19-22 medium grain mount
MD19-22M_z1a	411.044	392.153	87.3686	0.938554	20314.1	4756	6654.5	0.593377	7.36251	0.0769073	5.3909	-0.242906	13.0159	5.59311	0.0556542	6.44306	0.613438	0.0244687	4.15407	488.392	20.0445	23.4705	437.43	143.422	143.839	470.387	20.1273	23.3109	477.169	25.7242	28.3556	472.605	17.9608	21.4985	1.42129
MD19-22M_z2a	1146.59	166.927	41.7641	0.144853	53054.1	2974.89	679.618	0.565643	5.86811	0.071016	5.24682	0.0356868	14.0851	5.27105	0.0574819	5.3016	0.630054	0.0267963	3.4744	534.286	18.3178	22.6706	509.008	116.576	117.268	453.101	16.621	20.1139	442.159	22.5249	25.091	450.317	15.7721	19.3778	2.47482
MD19-22M_z3a	924.988	1060.31	218.121	1.14915	41924.1	3260.76	1330.4	0.541959	6.579	0.069111	5.29646	-0.0194994	14.4763	5.48633	0.0565902	5.98639	0.472866	0.0219247	3.74178	438.045	16.2152	19.5668	474.597	132.395	132.925	437.6	20.9934	23.6729	430.601	22.8511	25.2598	434.617	18.6483	21.5828	1.62556
MD19-22M_z3b	62.4349	27.5002	6.39508	0.426948	3141.25	890.972	1499.24	0.587672	9.6082	0.0763311	6.26198	0.0395183	13.1707	6.42239	0.0555713	8.51623	0.458437	0.0241083	7.62833	481.292	36.2791	38.2223	434.227	189.673	189.984	465.414	29.7784	31.9708	471.76	29.2144	31.5052	468.661	23.8579	26.5796	1.34509
MD19-22M_z4a	836.795	1291.78	304.12	1.52583	40004.4	1411.92	270.681	0.671703	7.50245	0.0732549	5.48508	0.00774835	13.6691	5.56798	0.0661645	6.80216	0.428368	0.0251382	3.68101	501.6	18.2366	22.132	810.501	142.282	143.718	518.92	27.2012	30.1364	455.152	24.4689	26.9853	479.632	22.0714	25.1182	14.0103
MD19-22M_z4b	515.029	536.102	141.58	1.04261	25184.7	748.12	220.368	0.798542	18.1042	0.0741822	5.34722	-0.0600925	13.4902	5.06023	0.0763512	17.3396	0.235384	0.0270298	7.79649	538.811	41.4505	43.5843	1103.36	346.713	347.808	585.484	75.1118	76.5246	460.976	22.5109	25.2894	468.019	22.0896	24.997	27.0098
MD19-22M_z5a	840.462	959.718	202.472	1.14103	39121.7	5309.37	2936.95	0.57321	6.0423	0.071411	5.43171	0.608895	14.0194	5.386	0.0580399	6.0772	-0.00287786	0.0227084	3.78103	453.656	16.9616	20.404	530.287	133.131	133.79	458.38	29.9964	32.1109	444.163	23.1171	25.6457	446.014	23.0573	25.6119	3.20082
MD19-22M_z5b	568.83	520.953	115.56	0.865554	26436	16948	45890.9	0.560091	6.13178	0.0705258	5.46855	0.7113	14.1966	5.492	0.0574583	6.40629	-0.245998	0.0234959	3.68574	469.255	17.0974	20.7351	508.243	140.868	141.44	450.101	34.2054	36.0087	438.802	23.2971	25.7507	437.443	23.2502	25.6938	2.57483
MD19-22M_z6a	804.174	443.187	101.657	0.532707	39676.6	1404.29	484.934	0.660837	7.40632	0.0811804	7.08761	0.347617	12.436	6.87941	0.0589186	6.38607	0.695306	0.0250594	3.96281	500.023	19.5727	23.224	563.162	139.122	139.833	510.299	20.8467	24.4405	498.579	33.0045	35.2797	508.788	20.5734	24.188	2.35076
MD19-22M_z6b	583.082	288.631	70.7553	0.473343	28070.6	2863.88	1800.16	0.672482	7.67409	0.0765479	6.11814	0.134275	13.1232	6.26529	0.0634594	6.96265	0.479143	0.0269745	5.81968	537.631	30.8774	33.6759	722.728	147.727	148.828	518.55	27.5204	30.4209	473.406	28.596	30.9484	496.643	24.2404	27.2352	9.536
MD19-22M_z7a	508.561	516.614	112.798	1.01828	24447.9	8215.82	12382.9	0.573724	6.00795	0.0729498	5.29941	0.278313	13.7154	5.39116	0.0567895	5.62594	0.347926	0.0231753	3.88466	462.938	17.7806	21.2155	482.394	124.266	124.849	458.434	23.2177	25.8924	453.668	23.6165	26.1987	456.128	20.6366	23.5776	1.0506
MD19-22M_z8a	389.693	456.118	100.222	1.12697	19403.4	1143.83	372.396	0.601837	6.01318	0.0772596	5.52182	0.508956	12.9651	5.71919	0.0562922	5.69457	0.394415	0.0240142	3.7164	479.319	17.6019	21.2936	462.828	126.215	126.744	476.191	23.8741	26.6777	478.969	26.3994	28.9881	477.267	21.9642	24.9958	0.580116
MD19-22M_z8b	339.757	239.839	58.1036	0.543873	16554.3	620.786	146.573	0.623095	6.80209	0.0748413	6.07704	-0.139573	13.4152	5.84966	0.0617992	7.01816	0.686763	0.0269894	8.84493	538.024	46.9601	48.8485	666.232	150.28	151.2	499.137	20.5211	24.0172	463.464	26.161	28.612	486.292	17.8241	21.5754	7.69694
MD19-22 fine grain mount
MD19-22F_z1a	271.028	262.846	54.5511	0.938969	13072.4	13072.4	1693.73	0.555824	7.51637	0.0747116	5.29109	0.34948	13.3897	5.07086	0.0537499	7.39379	-0.0537693	0.0227349	3.9899	454.051	17.9146	21.2081	359.575	166.853	167.095	447.118	33.2296	35.0593	464.317	22.7176	25.5114	462.524	22.4381	25.2423	3.7041
MD19-22F_z1b	385.418	379.556	79.3056	0.978294	17690.4	1686.17	784.308	0.587751	6.98159	0.0705119	5.3085	-0.142986	14.1893	5.44668	0.060124	6.29495	0.512736	0.0225295	3.64202	450.1	16.2114	19.7339	606.924	136.134	136.977	466.985	21.8701	24.7911	439.019	23.1173	25.5904	453.963	18.8849	22.0327	6.37015
MD19-22F_z2a	180.525	94.543	36.4471	0.528456	9102.59	307.804	35.2329	0.977089	7.50688	0.0792656	6.74502	0.337867	12.7292	7.21252	0.0893208	6.92865	0.495044	0.0422519	6.65172	835.997	54.4756	58.3472	1410.17	132.609	137.215	686.947	35.4935	39.43	487.518	33.8679	35.9942	551.001	33.9828	36.6685	40.9069
MD19-22F_z3a	120.515	82.5062	22.1026	0.679554	6511.82	360.655	119.542	0.673415	7.821	0.0842063	6.59809	0.365513	11.9598	6.62542	0.057917	7.46472	0.418925	0.0297317	7.73591	591.851	45.1214	47.4855	525.751	163.665	164.192	519.154	31.0012	33.6084	517.655	32.9538	35.4039	518.488	27.2682	30.1922	0.289398
MD19-22F_z4a	321.46	219.937	48.9069	0.690671	15757.6	2059.33	1689.14	0.588856	7.34742	0.0744791	5.53963	0.606083	13.4503	5.72503	0.0572629	7.79136	-0.239553	0.0236896	4.01978	473.005	18.7939	22.2046	500.571	171.549	172.005	468.767	40.2358	41.9078	462.297	25.5398	28.0331	461.664	25.4412	27.9368	1.39938
91500
91500_1	85.3275	31.562	16.0184	0.370702	9764.91	9764.91	281.823	1.7833	7.93196	0.175291	5.36541	0.218373	5.7093	5.52455	0.0734996	7.7534	0.073346	0.0543225	5.36204	1068.61	55.8096	61.8742	1026.86	156.809	158.897	1036.07	59.6406	65.0223	1040.44	53.0852	59.1152	1038.79	48.8955	55.3642	0.419939
91500_2	78.8358	28.7736	14.6182	0.366053	9030.87	936.535	441.42	1.81557	7.04285	0.175181	5.32086	0.358323	5.71145	5.29509	0.0748852	6.98114	-0.0455692	0.0543831	4.85627	1069.76	50.5959	57.2292	1064.65	140.394	142.894	1048.03	58.5167	64.1147	1040.08	50.859	57.1204	1042.54	48.8033	55.3269	0.764697
91500_3	82.601	30.3577	15.8074	0.36862	9618.37	9618.37	319.266	1.75812	6.32476	0.177441	5.35269	0.531172	5.6398	5.2201	0.0730833	7.48461	-0.272888	0.0555849	4.77493	1092.73	50.792	57.6726	1015.26	151.656	153.765	1040.31	66.5699	71.4699	1052.27	50.6797	57.1005	1051.18	50.2169	56.6775	1.13674
91500_4	84.9454	32.1599	15.9506	0.379775	9666.81	718.595	361.488	1.85763	5.76842	0.173983	5.30468	0.515486	5.75054	5.4323	0.0771155	5.50069	0.239657	0.0533053	5.66382	1049.24	57.9123	63.5759	1123.4	109.666	113.205	1062.81	44.4177	51.7582	1033.55	51.8728	57.9519	1053.46	43.1635	50.5638	2.83164
91500_5	83.5784	31.6695	15.4707	0.38094	9679.23	2641.74	3671.25	1.87071	6.71588	0.176595	5.39736	0.576643	5.66791	5.21339	0.0766215	6.86738	-0.173524	0.0521455	4.55394	1026.98	45.6	52.3311	1110.42	137.162	139.943	1068.07	61.5419	67.085	1047.45	50.3983	56.7954	1051.08	50.2332	56.6908	1.96835
91500_6	81.7812	31.4274	15.8907	0.385209	9537.25	1127.13	531.965	1.80211	6.75415	0.179733	5.27928	0.113542	5.56622	5.3583	0.072424	6.3276	0.296162	0.0545003	5.06605	1072.05	52.8944	59.297	996.854	128.573	130.966	1042.95	45.4751	52.4197	1065.09	52.6024	58.9578	1050.68	41.4618	49.0819	2.07852
91500_7	77.0421	28.4251	14.4859	0.369984	9229.72	1611.12	1168.71	1.87007	6.82674	0.182759	5.31419	0.442882	5.47514	5.50859	0.0739576	6.81408	-0.0370169	0.054437	5.99815	1070.91	62.5601	68.0481	1039.47	137.555	139.988	1067.59	58.9196	64.6827	1081.4	54.8456	61.1468	1075.73	50.9096	57.5763	1.27748
91500_8	76.4887	29.1185	14.5458	0.3815	9192.44	3197.93	3740.68	1.86603	7.26649	0.183426	5.33549	-0.250816	5.45542	5.25339	0.0733564	6.43238	0.583423	0.0534321	4.81426	1051.55	49.3265	55.8945	1023	130.167	132.656	1064.59	35.8453	44.6456	1085	52.4567	59.0548	1069.73	32.7997	42.3206	1.88085
91500_9	75.5744	28.5584	14.3007	0.379395	9000.41	9000.41	281.71	1.94364	6.39336	0.182074	5.26886	-0.058718	5.49383	5.13906	0.0770333	5.8473	0.470116	0.0537379	6.17016	1057.49	63.5688	68.8471	1121.07	116.604	119.925	1092.36	38.0542	46.8391	1078.01	51.0148	57.696	1088.56	36.015	45.1408	1.33089
91500_10	77.1384	29.0725	14.4885	0.377788	9259.88	9259.88	295.589	1.92854	6.07007	0.184791	5.28814	0.271493	5.41405	5.3287	0.0754016	5.70579	0.321257	0.0537224	5.43677	1057.11	55.997	61.92	1078.28	114.518	117.648	1087.84	42.9635	50.8477	1092.63	53.5589	60.1224	1089.12	40.9613	49.1853	0.437663
FC1
FC1_1	499.496	372.917	193.21	0.749657	59897.3	4338.6	1291.78	1.91691	5.67259	0.184502	5.16466	0.470847	5.41932	5.13549	0.0754767	5.21794	0.628743	0.0554398	3.215	1090.06	34.1166	43.6644	1080.41	104.691	108.119	1087.9	29.7826	40.3325	1091.65	51.5667	58.3433	1088.31	29.2955	39.9811	0.343165
FC1_2	878.824	745.597	384.01	0.850634	105610	8334.09	3445.72	1.90337	5.61448	0.183745	5.1948	0.214799	5.44242	5.17531	0.0747648	5.11876	0.700435	0.055166	3.18842	1084.89	33.6739	43.2382	1061.15	103.001	106.363	1078.69	26.4723	37.789	1087.38	51.7821	58.4841	1079.26	26.2357	37.634	0.79997
FC1_3	790.903	674.16	349.153	0.85566	97000.9	7936.44	3978.96	1.982	5.661	0.187415	5.28768	0.350237	5.33766	5.10196	0.0763465	5.21214	0.566094	0.0555402	3.06737	1091.97	32.6017	42.522	1103.36	104.214	107.803	1105.77	32.3699	42.5677	1106.99	51.8955	58.8136	1105.93	31.7496	42.1006	0.110524
FC1_4	712.647	538.917	287.225	0.759531	86756.1	86756.1	3622.32	1.98422	5.5632	0.186405	5.19388	0.535984	5.36449	5.11951	0.0768467	5.19647	0.355525	0.0571581	3.09179	1122.95	33.7743	43.9185	1116.4	103.693	107.384	1106.79	39.4715	48.2039	1101.9	51.8591	58.7216	1105.75	38.4317	47.341	0.443376
FC1_5	459.89	349.7	183.8	0.763498	57764.8	9226.6	6911.49	1.99907	5.85574	0.192447	5.36175	0.236418	5.20044	5.67018	0.0749831	5.2873	0.649422	0.056396	3.18078	1108.42	34.3091	44.102	1067.06	106.287	109.584	1111.12	31.0751	41.6807	1133.78	58.9493	65.4097	1111.73	30.9213	41.5763	1.99797
FC1_6	431.297	300.853	154.21	0.700376	52875.9	5534.04	3113.86	1.97075	5.7148	0.18753	5.2445	0.237322	5.33389	5.31756	0.0758567	5.21786	0.598937	0.0548799	3.57275	1079.33	37.5525	46.2417	1090.48	104.534	108.03	1101.91	31.7281	42.0185	1107.71	54.1248	60.7979	1102.43	31.3894	41.7718	0.523605
FC1_7	357.454	251.247	129.998	0.705253	44542	44542	2632.52	1.97818	5.76468	0.192561	5.32312	0.377466	5.19657	5.4421	0.0742197	5.34588	0.492543	0.0559349	3.54881	1099.43	37.9761	46.8791	1046.55	107.805	110.935	1104.76	36.5929	45.8459	1134.55	56.6142	63.322	1107.95	35.8577	45.31	2.62616
FC1_8	676.156	426.874	229.27	0.634384	85283.7	5920.52	2661.44	2.04072	5.67362	0.193138	5.12367	0.112529	5.17592	5.13108	0.0762526	5.22542	0.478233	0.0575985	3.18806	1131.36	35.0763	45.0592	1100.74	104.514	108.076	1125.71	35.9891	45.6863	1138.7	53.5573	60.653	1127.63	35.1311	45.0434	1.14046
FC1_9	910.11	721.974	376.842	0.795694	115972	53046.5	135243	2.00574	5.76908	0.194766	5.24508	0.125234	5.13573	5.29009	0.0743308	5.25247	0.619255	0.0559053	3.1724	1099.05	33.9305	43.6603	1049.53	105.862	109.065	1113.7	31.1089	41.7489	1146.86	55.5786	62.5383	1116.25	30.6318	41.4376	2.89144
FC1_10	1780.23	1243.6	660.533	0.699441	234651	65862.3	94465.1	2.05494	5.52034	0.201165	5.09273	0.203123	4.96882	5.13966	0.0737243	5.09068	0.561545	0.0568485	3.05524	1117.03	33.1989	43.3821	1032.9	102.875	106.066	1130.54	32.6662	43.1962	1182.06	55.5128	62.8884	1134.6	32.0131	42.7716	4.35813
Plesovice
Plesovice_1	1008.85	117.156	17.7389	0.116539	33723.9	12160.3	19352.1	0.376711	5.76272	0.0510258	5.26703	0.695377	19.6049	5.25509	0.0533468	5.6873	-0.163655	0.0161916	4.57784	324.451	14.7347	16.8198	342.693	128.717	129.002	323.38	23.1275	24.4998	320.704	16.4407	18.2915	320.571	16.4429	18.292	0.834371
Plesovice_2	1071.57	125.196	18.4586	0.117248	35702.7	35702.7	1266.84	0.374367	5.98488	0.0509999	5.16243	0.347926	19.6046	5.12211	0.052999	5.7217	0.080959	0.0157955	4.33843	316.697	13.6312	15.7637	327.776	129.853	130.111	321.567	20.2972	21.8313	320.71	16.0248	17.9187	320.879	15.713	17.6423	0.267133
Plesovice_3	1155.3	140.132	21.1543	0.121606	38846	5745.48	3674.95	0.378449	6.12186	0.0517993	5.22001	0.0363537	19.308	5.23777	0.0527566	5.60522	0.42865	0.0162421	4.4359	325.445	14.3211	16.4709	317.467	127.431	127.678	324.529	16.1215	18.0479	325.514	16.6271	18.5118	324.992	14.111	16.2829	0.302658
Plesovice_4	909.505	100.901	15.0562	0.111126	31646.2	1473.44	454.359	0.387045	6.05488	0.0531737	5.09082	0.259829	18.7977	5.11949	0.0525415	5.73893	-0.00546329	0.0159922	4.0769	320.475	12.9627	15.2388	307.959	130.7	130.926	330.861	21.7733	23.2915	334.127	16.6682	18.6442	333.683	16.4986	18.4876	0.977331
Plesovice_5	921.867	105.688	16.2532	0.115053	31407.3	3903.9	3132.42	0.373082	6.57628	0.0520062	5.21184	0.0869339	19.2306	5.27819	0.0517803	6.14066	0.260301	0.0164495	4.15947	329.619	13.5976	15.8997	274.676	140.692	140.859	320.459	19.1772	20.7833	326.792	16.8182	18.6975	324.467	15.5019	17.4959	1.93799
Plesovice_6	1024.53	122.53	18.2474	0.119807	35030.1	35030.1	1683.89	0.376309	6.28544	0.0523635	5.12142	0.379389	19.0908	5.16626	0.0518883	6.08475	-0.136436	0.0159726	4.15427	320.077	13.1912	15.4285	279.536	139.287	139.462	323.056	23.527	24.8747	329.125	16.5758	18.5057	329.095	16.5343	18.4681	1.84397
Plesovice_7	856.825	101.295	15.8323	0.11866	29900.9	3483.74	1437.27	0.393231	6.39259	0.0533237	5.16141	0.101963	18.7506	5.0531	0.0532293	6.01828	0.225761	0.0167508	3.94277	335.581	13.1227	15.5753	337.594	136.332	136.593	335.277	19.787	21.4891	334.944	16.4925	18.4965	335.047	15.5446	17.6577	0.0996943
Plesovice_8	874.501	104.91	15.5078	0.120276	30469.2	30469.2	1242.84	0.38983	6.12033	0.0532905	5.19385	0.318925	18.7652	5.15779	0.0528166	5.79863	0.113859	0.0158489	4.46125	317.691	14.0613	16.1493	320.051	131.781	132.024	332.854	20.7431	22.35	334.689	16.8228	18.7887	334.245	16.3112	18.327	0.548201
Plesovice_9	835.1	99.3094	14.5343	0.119283	29559	29559	1377.23	0.395537	6.36184	0.0546144	5.16008	0.0845332	18.3077	5.18559	0.0523011	5.9582	0.219237	0.0157559	5.25568	315.901	16.4746	18.2698	297.522	135.941	136.144	337.075	20.0465	21.7457	342.835	17.3149	19.3201	340.863	16.184	18.2904	1.68029
Plesovice_10	854.243	101.107	15.9565	0.118824	29805.7	6084.29	6258.06	0.393626	6.85953	0.053837	5.15928	-0.214752	18.5719	5.14919	0.0527779	6.33228	0.444417	0.0170425	5.87779	341.342	19.8955	21.6484	318.329	143.938	144.158	335.588	17.5293	19.4336	338.084	16.9593	18.9488	336.9	14.3037	16.5992	0.73818
Temora II
Temora2_1	163.891	89.0062	16.3817	0.530116	6980.63	588.334	239.723	0.479994	9.12853	0.0652876	5.6321	-0.0719235	15.3488	5.83015	0.0530265	8.49567	0.412067	0.0198535	4.24849	397.082	16.7033	19.4306	329.06	192.761	192.936	395.434	26.4771	28.2625	406.879	22.9879	25.1379	402.233	19.5759	22.0076	2.81271
Temora2_2	342.45	143.591	27.4649	0.420895	14428.9	14428.9	731.584	0.480409	6.92595	0.064606	5.40328	0.301979	15.4945	5.47935	0.053724	6.7091	0.141129	0.0206076	4.54799	412.131	18.5538	21.2227	358.315	151.429	151.694	396.576	26.3981	28.1985	403.17	21.4131	23.6667	401.36	20.4444	22.774	1.63566
Temora2_3	333.259	211.298	40.6564	0.639566	14314.3	3702.23	4848.07	0.50553	6.95563	0.0662145	5.29402	0.214147	15.1102	5.41209	0.0551754	6.7066	0.161956	0.0206772	4.01206	413.517	16.4216	19.4047	418.519	149.791	150.156	413.926	26.8782	28.8014	413.103	21.6558	23.9924	413.326	20.6992	23.135	0.199324
Temora2_4	326.45	228.835	43.8778	0.702927	14174.6	3057.74	2834.62	0.508366	6.68101	0.0669468	5.31046	0.32438	14.9464	5.50774	0.0548937	6.52021	0.0626063	0.020663	4.10603	413.121	16.7905	19.7126	406.739	145.915	146.269	415.844	28.2101	30.0647	417.487	22.2664	24.5912	417.14	21.7319	24.1045	0.393525
Temora2_5	222.984	147.301	28.3554	0.657165	9627.39	9627.39	692.975	0.494568	7.1014	0.0661029	5.36178	0.376564	15.1388	5.32726	0.0540763	7.10544	-0.0299994	0.0207049	3.83031	413.912	15.6915	18.7963	373.37	159.942	160.214	406.493	30.1721	31.8375	412.346	21.2779	23.6436	411.73	21.0907	23.4684	1.41962
Temora2_6	296.947	211.347	40.8246	0.710973	12905.2	12905.2	973.823	0.516017	7.41987	0.0665204	5.18276	0.290868	15.0323	5.11327	0.0560275	7.33039	-0.0735983	0.020784	3.78427	415.496	15.5618	18.7101	452.559	162.739	163.132	420.927	31.8415	33.5353	415.176	20.5588	23.0304	415.356	20.5754	23.0472	1.38524
Temora2_7	517.602	458.938	90.751	0.890992	22909.9	2206.14	783.523	0.519021	6.41613	0.0680507	5.2098	0.0211247	14.6965	5.30864	0.0550786	5.9656	0.362843	0.0212019	3.39798	423.806	14.2509	17.758	414.467	133.337	133.739	422.824	22.0885	24.4875	424.358	21.8037	24.2477	423.61	18.9401	21.6998	0.361523
Temora2_8	382.317	188.922	37.1612	0.494198	17034.4	1539.01	877.194	0.508827	6.66157	0.0688673	5.31036	-0.0937043	14.5273	5.13932	0.0533024	5.97757	0.510481	0.0214057	4.26737	427.96	18.069	20.999	340.571	135.354	135.622	415.518	18.9189	21.5832	429.138	21.3354	23.8809	420.968	16.4755	19.5499	3.17383
Temora2_9	314.78	121.543	22.7823	0.388875	13952	13952	1184.94	0.517272	6.90397	0.0678275	5.374	0.0892263	14.7565	5.46718	0.0550544	6.4536	0.319276	0.020048	4.77538	401.043	18.961	21.4486	413.249	144.274	144.643	421.227	24.1375	26.3346	422.686	22.3669	24.7375	422.063	19.9612	22.5784	0.345119
Temora2_10	355.778	130.948	25.5127	0.367565	15827.2	2266.27	1310.01	0.499743	7.12183	0.0678129	5.3227	-0.181642	14.7561	5.45367	0.0531531	6.38058	0.540892	0.0208247	3.89215	416.287	16.0361	19.1172	334.186	144.643	144.884	409.266	19.2954	21.8403	422.697	22.3143	24.69	414.446	16.817	19.7526	3.17739
NIST612
NIST612_1	55.4549	72.9678	359.985	1.31844	8951.2	17.364	1.42877	30.4157	6.132	0.245508	6.0375	0.492464	4.09067	6.04144	0.895492	5.40932	0.78338	0.525894	3.45073
NIST612_2	57.1104	75.4215	376.337	1.32486	9159.4	17.2281	1.35606	30.7675	6.13913	0.243818	5.87233	0.379214	4.11472	5.6477	0.911613	5.34617	0.76915	0.530969	3.61152
NIST612_3	57.2351	76.8359	377.268	1.3417	9324.75	16.2812	1.35676	31.0966	6.33919	0.250559	6.08777	0.323536	4.00865	5.91294	0.897182	5.40128	0.822948	0.528106	3.20802
NIST612_4	55.7711	75.629	375.33	1.3561	9218.51	16.6618	1.45138	31.3506	6.21735	0.251612	5.99525	0.306014	3.98889	5.79993	0.899874	5.26373	0.864541	0.529868	3.65822
NIST612_5	55.2068	74.1015	370.751	1.34671	9112.84	16.6006	1.29082	31.094	6.22229	0.252248	5.61099	-0.090362	3.9717	5.52649	0.889489	5.29586	0.840091	0.534319	3.58108
NIST612_6	55.4424	75.5193	376.593	1.36472	9309.33	17.5992	1.49712	31.6411	6.12435	0.255309	5.82568	0.27734	3.92895	5.73721	0.894979	5.27107	0.847397	0.531418	3.38055
NIST612_7	55.2548	74.9107	369.804	1.35882	9196.36	16.9503	1.41254	31.3332	5.95931	0.253286	5.9014	0.566859	3.96178	5.77687	0.89441	5.49147	0.690966	0.526353	3.52422
NIST612_8	54.8374	75.6873	373.314	1.38168	9307.17	16.934	1.39803	31.5155	5.94074	0.258308	5.65456	0.339874	3.87992	5.5566	0.881155	5.27928	0.766438	0.526279	3.38844
NIST612_9	53.9545	73.5664	365.48	1.36924	9054.84	17.5555	1.33603	31.3988	6.00871	0.258321	5.73376	0.313792	3.88099	5.50894	0.878398	5.30141	0.802132	0.532945	3.51383
NIST612_10	54.0907	73.8009	365.186	1.36843	9056.94	17.1247	1.28253	31.2589	6.26165	0.257277	5.77637	0.0982768	3.89791	5.68878	0.877686	5.36085	0.803245	0.530896	3.82151
1 Calculated assuming U isotope composition of Hiess et al. (2012)
2 Dates calculated in IsoplotR using Iolite output (isotope ratios)
3 Discordance calculated as [1 –(206Pb/238U date) / (207Pb/235U date)] and given as an absolute value
References
Hiess, J., Condon, D.J., McLean, N. & Noble, S.R., 2012. 238U/235U systematics in terrestrial uranium-bearing minerals. Science 335, 1610–1614.

## Sheet: Details_17Jan2024
Laboratory, sample preparation and imaging details
Laboratory name	Tectonics, Metamorphic Petrology & Orogeny (TeMPO) Laboratory, Johns Hopkins University
Sample type/mineral	Zircon
Sample preparation	Mineral separation used zircon low magnetic susceptibility and high density; annealed for 60–66 h at 900 °C; mounted in 1 inch epoxy round, grains ground to mid section then polished to 0.3 µm SiC paste finish
Imaging type, instrument, conditions	Cathodoluminescence with Deben Centaurus detector on Thermo U3 FIB-SEM; 1.6 nA, 5kV, 10 mm WD
Laser ablation system details
Make, Model and type	Teledyne (Photon Machines) Analyte G2
Ablation cell and volume	HelEx II active two-volume ablation cell
Laser wavelength (nm)	193 nm ArF Excimer
Pulse width	4 ns
Fluence	4.0 J cm-2
Repetition rate	8 Hz
Ablation duration	25 s
Ablation pit depth / ablation rate	20 µm pit depth, measured using an optical microscope, equivalent to 100 nm/pulse
Analytical 'spot' shape and size	Square; 30 µm x 30 µm
Sampling mode / pattern	Static spot ablation
Cell carrier gas flows	0.3 L min-1 He flow into ablation cup; 0.5 L min-1 He flow into ablation cell
Inductively-coupled-plasma mass spectromer (ICP-MS) system details
Make, model, type, analytical mode	Agilent Technologies 8900 triple quadrupole ICP-MS, operating in single quad mode
Sample introduction	1 cm inner diameter PFA tubing with inline Teledyne 'SQUID' smoothing device, 2.5 mm quartz injector; 5 cm sampling depth; Ni cones, high-sensitivity skimmer insert
RF power	1550 W
Make-up gas flow and position	0.80 L min-1 Ar, between cell and torch
Detection system	Single ion-counting SEM
Masses measured (and dwell times)	29,47,88,89,91,93,139,140,153,157,172,175 (10 ms); 204,206,207,208 (200 ms); 232,238 (100 ms)
Total integration time	1.1338 s
‘Sensitivity’ as useful yield	0.003%–0.005% U [100 x (#ions detected / #atoms sampled); Schaltegger et al. (2015)]
IC Dead time	41.6 ns
Data processing details
Gas blank	15 s on-peak zero subtracted
Calibration and standardsl strategy	91500 as primary reference material for geochronology, FC1, Plešovice and Temora II, to assess accuracy; NIST610 as primary reference material for geochemistry, NIST610 to assess accuracy
Common-Pb correction	No common-Pb correction applied
Data processing packages	Iolite v4.6.1 (Paton et al., 2011), using the U-Pb geochronology data reduction scheme (Paton et al., 2010) and a mean–median fit to the standard data, with an exponential fit to downhole fractionation correction; concordia plots made and final ages calculated in IsoplotR (Vermeesch, 2018)
Uncertainty level and propagation	Ages quoted at 2s absolute, propagation is by addition in quadrature. Reproducibility of primary reference material propagated where appropriate. Excess uncertainty = 2.5%.
Discordance criteria	Discordance reported as the relative difference between the measured 207Pb/235U and 206Pb/238U dates; calculated as |1–(206Pb/238U date)/(207Pb/235U date)| and reported as %
Interpreted age transition	The transition from preferred interpretation of 207Pb/206Pb (for older) to 206Pb/238U (for younger) dates set at 850 Ma
Mass discrimination corrections1	206Pb/238U fractionation error = 0.54%
	207Pb/235U fractionation error = 1.19%
	208Pb/232Th fractionation error = 0.77%
Quality control and validation (materials)	91500 (Wiedenbeck et al., 1995; Schoene et al., 2006); 1063.6 ± 0.3 Ma
	FC-1 (Paces & Miller, 1993): 1099.9 ± 1.1 Ma
	Plešovice (Sláma et al., 2008): 337.13 ± 0.37 Ma
	Temora II (Black et al., 2004): 416.78 ± 0.33 Ma
Quality control and validation (results)	91500 (206Pb/238U): 1060 ± 15 Ma (MSWD=1.1, p(χ2)=0.3, n=28/28)
	91500 (207Pb/206Pb): 1063 ± 11 Ma (MSWD=0.54, p(χ2)=0.97, n=27/28)
	FC-1 (206Pb/238U): 1123 ± 22 Ma (MSWD=0.89, p(χ2)=0.57, n=15/15)
	FC-1 (207Pb/206Pb): 1077.7 ± 7.3 Ma (MSWD=1.7, p(χ2)=0.054, n=15/15)
	Plešovice (206Pb/238U): 339.0 ± 5.1 Ma (MSWD=0.91, p(χ2)=0.6, n=28/28)
	Plešovice (207Pb/206Pb): 319.9 ± 8.7 Ma (MSWD=1.2, p(χ2)=0.25, n=28/28)
	Temora II (206Pb/238U): 420.9 ± 6.3 Ma (MSWD=1.2, p(χ2)=0.18, n=28/28)
	Temora II (207Pb/206Pb): 396 ± 14 Ma (MSWD=0.91, p(χ2)=0.59, n=27/28)
1Fractionation error calculated in Iolite from primary reference material
References
Black, L.P., Kamo, S.L., Allen, C.M., Davis, D.W., Aleinikoff, J.N., Valley, J.W., Mundil, R., Campbell, I.H., Korsch, R.J., Williams, I.S. & Foudoulis, C., 2004. Improved 206Pb/238U microprobe geochronology by the monitoring of a trace-element-related matrix effect; SHRIMP, ID–TIMS, ELA–ICP–MS and oxygen isotope documentation for a series of zircon standards. Chemical Geology 205, 115–140.
Paces, J.B. & Miller, J.D., 1993. Precise ages of the Duluth Complex and related mafic intrusions, northeastern Minnesota: geochronological insights to physical, petrogenetic, paleomagnetic and tectonomagmatic processes associated with the 1.1 Ga Midcontinent Rift System. Journal of Geophysical Research 98, 13997–14013.
Paton, C., Woodhead, J.D., Hellstrom, J.C., Hergt, J.M., Greig, A. & Maas, R., 2010. Improved laser ablation U–Pb zircon geochronology through robust downhole fractionation correction. Geochemistry Geophysics Geosystems 11, Q0AA06.
Paton, C., Hellstrom, J., Paul, B., Woodhead, J. & Hergt, J., 2011. Iolite: freeware for the visualization and processing of mass spectrometric data. Journal of Analytical Atomic Spectroscopy 26, 2508–2518.
Schaltegger, U., Schmitt, A.K. & Horstwood, M.S.A., 2015. U–Th–Pb zircon geochronology by ID-TIMS, SIMS, and laser ablation ICP-MS: recipes, interpretations, and opportunities. Chemical Geology 402, 89–100.
Schoene, B., Crowley, J.L., Condon, D.J., Schmitz, M.D. & Bowring, S.A., 2006. Reassessing the uranium decay constants for geochronology using ID–TIMS U–Pb data. Geochimica et Cosmochimica Acta 70,426–445.
Sláma, J., Košler, J., Condon, D.J., Crowley, J.L., Gerdes, A., Hanchar, J.M., Horstwood, M.S.A., Morris, G.A., Nasdala, L., Norberg, N., Schaltegger, U., Schoene, B., Tubrett, M.N. & Whitehouse, M.J., 2008. Plešovice zircon – A new natural reference material for U–Pb and Hf isotopic microanalysis. Chemical Geology 249, 1–35.
Vermeesch, P, 2018. IsoplotR: A free and open toolbox for geochronology. Geoscience Frontiers 9, 1479–93.
Wiedenbeck, M., Allé, P., Corfu, F., Griffin, W.L., Meier, M., Oberli, F., von Quadt, A., Roddick, J.C. & Spiegel, W., 1995. Three natural zircon standards for U-Th-Pb, Lu-Hf, trace element and REE analyses. Geostandards and Geoanalytical Research 1, 1–23.

[truncated: 1 more sheets: Data_17Jan2024]
